# Supplementary material for: Identification of Necroptosis-related Subtypes, Construction of a Prognosis Model, and Characterization of Immune Infiltration in Colon Cancer.
Source: Research Square preprint supplement (doi:10.21203/rs.3.rs-1251517/v1), 2022-01-19
Supplement: Supplementary file 1 [file b7224d33cb526b3eb8c2340b.xlsx]

## Sheet: S1
Table S1: Clinical information of 1147 colon cancer patients
Id	futime	fustat	Age	Gender	Stage	T_stage	N_stage	M_stage	Dataset
GSM972189	5760	0	63	MALE	Stage III	T4	unknow	M0	GSE39582
GSM972102	1380	0	22	MALE	Stage III	T3	N1	M0	GSE39582
GSM972286	1110	0	24	MALE	Stage II	T3	N0	M0	GSE39582
GSM971973	1380	0	24.9	MALE	Stage II	T3	N0	M0	GSE39582
GSM971969	1890	0	30.2	MALE	Stage I	T1	N0	M0	GSE39582
GSM972055	2790	0	31	FEMALE	Stage II	T4	N0	M0	GSE39582
GSM971970	2580	0	31.7	FEMALE	Stage I	T2	N0	M0	GSE39582
GSM972263	2280	0	32	MALE	Stage III	T2	N1	M0	GSE39582
GSM972051	840	1	34	FEMALE	Stage IV	T3	N0	M1	GSE39582
GSM971957	300	1	34.5	MALE	Stage IV	T4	N2	M1	GSE39582
GSM971971	1950	0	34.7	FEMALE	Stage IV	T4	N2	M1	GSE39582
GSM971964	1050	0	35.4	FEMALE	Stage III	T2	N2	M0	GSE39582
GSM971958	270	1	36.4	FEMALE	Stage IV	T3	N2	M1	GSE39582
GSM971959	1560	0	36.9	MALE	Stage II	T4	N0	M0	GSE39582
GSM972252	480	0	37	FEMALE	Stage IV	T3	N1	M1	GSE39582
GSM971965	990	0	37.5	FEMALE	Stage II	T3	N0	M0	GSE39582
GSM971960	2220	0	38.2	FEMALE	Stage I	T2	N0	M0	GSE39582
GSM971961	960	1	39.2	FEMALE	Stage IV	T3	N1	M1	GSE39582
GSM971972	2250	0	40.2	MALE	Stage I	T2	N0	M0	GSE39582
GSM971966	1890	0	40.5	FEMALE	Stage III	T3	N1	M0	GSE39582
GSM971974	1680	0	40.7	FEMALE	Stage IV	T4	N1	M1	GSE39582
GSM971977	1470	0	40.8	FEMALE	Stage III	T4	N1	M0	GSE39582
GSM971975	1380	0	41.9	FEMALE	Stage II	T3	N0	M0	GSE39582
GSM972503	4380	0	42	FEMALE	Stage II	T3	N0	M0	GSE39582
GSM972407	3960	0	42	FEMALE	Stage II	T4	N0	M0	GSE39582
GSM972166	360	1	42	FEMALE	Stage III	T3	unknow	M0	GSE39582
GSM972075	1320	1	42	MALE	Stage II	T4	N0	M0	GSE39582
GSM972155	720	1	42	MALE	Stage III	T3	N2	M0	GSE39582
GSM971967	930	1	42.6	MALE	Stage II	T3	N0	M0	GSE39582
GSM972494	1710	0	43	FEMALE	Stage I	T2	N0	M0	GSE39582
GSM972430	1590	0	43	FEMALE	Stage II	T3	N0	M0	GSE39582
GSM972194	2490	0	43	MALE	Stage III	T3	N2	M0	GSE39582
GSM972062	690	1	43	FEMALE	Stage II	T4	N0	M0	GSE39582
GSM972079	5040	0	44	MALE	Stage II	T3	N0	M0	GSE39582
GSM972068	660	1	44	MALE	Stage II	T4	N0	M0	GSE39582
GSM972438	900	1	44	MALE	Stage IV	T4	N1	M1	GSE39582
GSM971968	3360	0	44.9	FEMALE	Stage II	T4	N0	M0	GSE39582
GSM972033	1500	0	45	FEMALE	Stage II	T4	N0	M0	GSE39582
GSM972158	3600	0	45	FEMALE	Stage III	T3	N2	M0	GSE39582
GSM972216	2820	0	45	FEMALE	Stage IV	T3	N2	M1	GSE39582
GSM971976	1080	0	45.2	FEMALE	Stage II	T4	N0	M0	GSE39582
GSM972264	2190	0	46	MALE	Stage II	T3	N0	M0	GSE39582
GSM972353	3990	0	46	FEMALE	Stage II	T4	N0	M0	GSE39582
GSM972375	3510	0	46	FEMALE	Stage III	T3	N1	M0	GSE39582
GSM972028	2340	0	46	FEMALE	Stage III	T3	N2	M0	GSE39582
GSM972291	960	0	46	MALE	Stage III	T4	N2	M0	GSE39582
GSM972322	2580	1	46	MALE	Stage II	T3	N0	M0	GSE39582
GSM972036	1500	0	47	FEMALE	Stage II	T4	N0	M0	GSE39582
GSM972371	2430	0	47	MALE	Stage III	T3	N1	M0	GSE39582
GSM1681368	2430	0	47	MALE	Stage III	T3	N1	M0	GSE39582
GSM972167	1350	1	47	MALE	Stage II	T3	N0	M0	GSE39582
GSM972272	450	1	47	FEMALE	Stage IV	T3	N1	M1	GSE39582
GSM972065	1380	0	48	MALE	Stage II	T3	N0	M0	GSE39582
GSM972076	4590	0	48	MALE	Stage II	T3	N0	M0	GSE39582
GSM972445	1050	0	48	MALE	Stage II	T4	N0	M0	GSE39582
GSM972411	3750	0	48	FEMALE	Stage III	T1	N1	M0	GSE39582
GSM972437	210	1	48	FEMALE	Stage IV	T3	N2	M1	GSE39582
GSM972124	2250	0	49	FEMALE	Stage II	T3	N0	M0	GSE39582
GSM972333	2400	0	49	MALE	Stage II	T3	N0	M0	GSE39582
GSM972426	2430	0	49	MALE	Stage II	T3	N0	M0	GSE39582
GSM972443	1440	0	49	MALE	Stage II	T3	N0	M0	GSE39582
GSM972474	3570	0	49	FEMALE	Stage III	T3	N1	M0	GSE39582
GSM972191	3660	0	49	MALE	Stage III	T3	N1	M0	GSE39582
GSM972020	2340	0	49	FEMALE	Stage III	T3	N2	M0	GSE39582
GSM972025	1590	0	49	MALE	Stage III	T3	N2	M0	GSE39582
GSM972441	2040	0	49	FEMALE	Stage IV	T4	N2	M1	GSE39582
GSM972416	240	1	49	MALE	Stage II	T4	N0	M0	GSE39582
GSM972154	1320	1	49	FEMALE	Stage III	T4	N2	M0	GSE39582
GSM972095	2010	0	50	MALE	Stage II	T3	N0	M0	GSE39582
GSM972440	1560	0	50	MALE	Stage II	T3	N0	M0	GSE39582
GSM972470	2550	0	50	MALE	Stage II	T3	N0	M0	GSE39582
GSM1681363	2550	0	50	MALE	Stage II	T3	N0	M0	GSE39582
GSM972169	4920	0	50	MALE	Stage II	T4	N0	M0	GSE39582
GSM972362	2940	0	50	MALE	Stage III	T3	N1	M0	GSE39582
GSM972048	900	0	50	FEMALE	Stage IV	T4	N0	M1	GSE39582
GSM972498	1770	1	50	FEMALE	Stage III	T3	N1	M0	GSE39582
GSM972366	720	1	50	MALE	Stage III	T3	N2	M0	GSE39582
GSM972210	1380	1	50	MALE	Stage IV	T3	unknow	M1	GSE39582
GSM972186	1410	1	50	FEMALE	Stage III	unknow	unknow	unknow	GSE39582
GSM972244	420	0	51	FEMALE	Stage I	T1	N0	M0	GSE39582
GSM972225	1110	0	51	MALE	Stage II	T3	N0	M0	GSE39582
GSM972193	2190	0	51	FEMALE	Stage III	T3	N1	M0	GSE39582
GSM972453	3000	0	51	FEMALE	Stage III	T3	N1	M0	GSE39582
GSM972449	1230	1	51	FEMALE	Stage III	T4	N1	M0	GSE39582
GSM972414	1590	0	52	FEMALE	Stage II	T3	N0	M0	GSE39582
GSM972198	1710	0	52	FEMALE	Stage III	T3	N1	M0	GSE39582
GSM972250	360	0	52	MALE	Stage III	T3	N1	M0	GSE39582
GSM972321	270	0	52	MALE	Stage III	T3	N2	M0	GSE39582
GSM972423	1200	0	52	FEMALE	Stage II	unknow	unknow	unknow	GSE39582
GSM972358	2430	0	53	FEMALE	Stage II	T3	N0	M0	GSE39582
GSM972522	2970	0	53	FEMALE	Stage II	T3	N0	M0	GSE39582
GSM972123	2130	0	53	MALE	Stage II	T3	N0	M0	GSE39582
GSM972238	570	0	53	FEMALE	Stage III	T2	N1	M0	GSE39582
GSM972105	960	0	53	MALE	Stage III	T2	N3	M0	GSE39582
GSM972182	1740	1	53	MALE	Stage II	T4	N0	M0	GSE39582
GSM972288	1050	1	53	MALE	Stage IV	T4	N1	M1	GSE39582
GSM972195	3600	0	54	FEMALE	Stage II	T3	N0	M0	GSE39582
GSM972046	1740	0	54	MALE	Stage II	T3	N0	M0	GSE39582
GSM972063	2100	0	54	MALE	Stage II	T3	N0	M0	GSE39582
GSM972360	4230	0	54	FEMALE	Stage III	T3	N1	M0	GSE39582
GSM1681355	4230	0	54	FEMALE	Stage III	T3	N1	M0	GSE39582
GSM972136	3900	0	54	MALE	Stage III	T3	N1	M0	GSE39582
GSM972399	2700	0	54	FEMALE	Stage III	T4	N1	M0	GSE39582
GSM972467	2160	0	54	MALE	Stage III	T3	N2	M0	GSE39582
GSM972231	420	0	54	MALE	Stage IV	T3	N1	M1	GSE39582
GSM972019	750	1	54	MALE	Stage III	T3	N3	M0	GSE39582
GSM972212	540	1	54	FEMALE	Stage IV	T3	N1	M1	GSE39582
GSM972442	180	1	54	FEMALE	Stage IV	T3	N2	M1	GSE39582
GSM972209	390	1	54	MALE	Stage IV	T3	N2	M1	GSE39582
GSM972299	1230	1	54	FEMALE	Stage IV	T4	N2	M1	GSE39582
GSM972237	750	0	55	FEMALE	Stage I	T1	N0	M0	GSE39582
GSM972053	870	0	55	MALE	Stage II	T2	N0	M0	GSE39582
GSM972311	3180	0	55	MALE	Stage II	T3	N0	M0	GSE39582
GSM972093	2220	0	55	FEMALE	Stage II	T4	N0	M0	GSE39582
GSM972150	3270	0	55	FEMALE	Stage III	T3	N1	M0	GSE39582
GSM972230	810	0	55	MALE	Stage III	T3	N1	M0	GSE39582
GSM972325	2130	0	55	MALE	Stage III	T3	N1	M0	GSE39582
GSM972085	2910	0	56	MALE	Stage II	T3	N0	M0	GSE39582
GSM972461	2880	0	56	MALE	Stage II	T3	N0	M0	GSE39582
GSM972101	1050	0	56	MALE	Stage III	T3	N1	M0	GSE39582
GSM972253	480	0	56	FEMALE	Stage IV	T3	N2	M1	GSE39582
GSM972359	900	1	56	FEMALE	Stage II	T3	N0	M0	GSE39582
GSM972043	810	1	56	MALE	Stage IV	T3	N0	M1	GSE39582
GSM972266	600	1	56	MALE	Stage IV	T4	N2	M1	GSE39582
GSM972143	4620	0	57	MALE	Stage II	T4	N0	M0	GSE39582
GSM972226	600	0	57	MALE	Stage II	T4	N0	M0	GSE39582
GSM972235	210	0	57	FEMALE	Stage III	T2	N1	M0	GSE39582
GSM972202	1590	0	57	FEMALE	Stage III	T3	N1	M0	GSE39582
GSM972157	3540	0	57	MALE	Stage III	T3	N1	M0	GSE39582
GSM972251	210	1	57	MALE	Stage IV	T4	N1	M1	GSE39582
GSM972248	420	0	58	MALE	Stage II	T3	N0	M0	GSE39582
GSM972044	1260	0	58	MALE	Stage II	T4	N0	M0	GSE39582
GSM972451	2910	0	58	MALE	Stage II	T4	N0	M0	GSE39582
GSM972472	2400	0	58	MALE	Stage II	T4	N0	M0	GSE39582
GSM972188	660	0	58	FEMALE	Stage III	T3	N2	M0	GSE39582
GSM972141	2520	0	58	MALE	Stage III	T3	N2	M0	GSE39582
GSM972029	1080	0	58	MALE	Stage III	T4	N2	M0	GSE39582
GSM972185	1170	0	58	FEMALE	Stage III	unknow	unknow	unknow	GSE39582
GSM972077	930	1	58	FEMALE	Stage II	T3	N0	M0	GSE39582
GSM972382	1140	1	58	MALE	Stage II	T3	N0	M0	GSE39582
GSM972519	420	1	58	MALE	Stage II	T3	N0	M0	GSE39582
GSM972021	1110	1	58	FEMALE	Stage III	T3	N2	M0	GSE39582
GSM972369	3060	1	58	MALE	Stage III	T3	N2	M0	GSE39582
GSM972239	420	0	59	MALE	Stage II	T3	N0	M0	GSE39582
GSM972417	4380	0	59	MALE	Stage II	T3	N0	M0	GSE39582
GSM972023	480	0	59	FEMALE	Stage III	T3	N1	M0	GSE39582
GSM972377	2460	0	59	FEMALE	Stage III	T3	N1	M0	GSE39582
GSM972148	3810	0	59	MALE	Stage III	T3	N1	M0	GSE39582
GSM972431	1620	0	59	MALE	Stage III	T3	N1	M0	GSE39582
GSM972365	1410	0	59	FEMALE	Stage III	T3	N2	M0	GSE39582
GSM972276	1290	0	59	MALE	Stage III	T3	N2	M0	GSE39582
GSM972173	780	1	59	FEMALE	Stage II	T4	N0	M0	GSE39582
GSM972372	1500	1	59	MALE	Stage III	T4	N2	M0	GSE39582
GSM972115	2250	1	59	FEMALE	Stage III	T3	N3	M0	GSE39582
GSM972315	2520	0	60	FEMALE	Stage I	T1	N0	M0	GSE39582
GSM972304	900	0	60	FEMALE	Stage II	T3	N0	M0	GSE39582
GSM972327	2490	0	60	MALE	Stage II	T3	N0	M0	GSE39582
GSM972348	1860	0	60	MALE	Stage II	T3	N0	M0	GSE39582
GSM972146	1980	0	60	MALE	Stage III	T3	N2	M0	GSE39582
GSM972219	1590	0	60	MALE	Stage IV	T3	N2	M1	GSE39582
GSM972064	660	1	60	MALE	Stage IV	T4	N0	M1	GSE39582
GSM971962	2190	0	60.9	MALE	Stage III	T4	N2	M0	GSE39582
GSM972126	1890	0	61	MALE	Stage II	T3	N0	M0	GSE39582
GSM972200	1620	0	61	MALE	Stage II	T3	N0	M0	GSE39582
GSM972329	2340	0	61	MALE	Stage II	T3	N0	M0	GSE39582
GSM972080	4950	0	61	MALE	Stage II	T4	N0	M0	GSE39582
GSM972476	1920	0	61	MALE	Stage III	T4	N1	M0	GSE39582
GSM972038	30	1	61	MALE	Stage II	T3	N0	M0	GSE39582
GSM972241	510	1	61	MALE	Stage II	T3	N0	M0	GSE39582
GSM972384	3180	1	61	MALE	Stage II	T3	N0	M0	GSE39582
GSM972227	600	1	61	MALE	Stage IV	T3	N2	M1	GSE39582
GSM971999	30	0	61.5	MALE	Stage III	T3	N1	M0	GSE39582
GSM971995	750	0	61.8	FEMALE	Stage II	T4	N0	M0	GSE39582
GSM972454	2250	0	62	MALE	Stage I	T2	N0	M0	GSE39582
GSM972292	750	0	62	FEMALE	Stage II	T3	N0	M0	GSE39582
GSM972187	1470	0	62	MALE	Stage II	T3	N0	M0	GSE39582
GSM972387	3690	0	62	MALE	Stage II	T3	N0	M0	GSE39582
GSM1681357	3690	0	62	MALE	Stage II	T3	N0	M0	GSE39582
GSM972024	1290	0	62	MALE	Stage III	T2	N2	M0	GSE39582
GSM972428	1650	0	62	MALE	Stage III	T3	N2	M0	GSE39582
GSM972512	690	1	62	MALE	Stage III	T4	N2	M0	GSE39582
GSM972183	960	1	62	FEMALE	Stage III	unknow	unknow	unknow	GSE39582
GSM972004	2670	0	62.9	FEMALE	Stage IV	T3	N1	M1	GSE39582
GSM972144	3630	0	63	FEMALE	Stage II	T3	N0	M0	GSE39582
GSM972427	1590	0	63	MALE	Stage II	T3	N0	M0	GSE39582
GSM972096	450	0	63	FEMALE	Stage III	T2	N1	M0	GSE39582
GSM972379	2850	0	63	FEMALE	Stage III	T2	N1	M0	GSE39582
GSM971996	2280	0	63	FEMALE	Stage III	T3	N1	M0	GSE39582
GSM972113	810	0	63	FEMALE	Stage III	T3	N1	M0	GSE39582
GSM972336	1500	0	63	MALE	Stage III	T3	N1	M0	GSE39582
GSM972145	4050	0	63	FEMALE	Stage III	T3	N2	M0	GSE39582
GSM972111	660	0	63	MALE	Stage III	T3	N2	M0	GSE39582
GSM972256	570	0	63	FEMALE	Stage IV	T4	N1	M1	GSE39582
GSM972078	4350	1	63	MALE	Stage II	T3	N0	M0	GSE39582
GSM972381	1440	1	63	MALE	Stage II	T3	N0	M0	GSE39582
GSM972284	810	1	63	FEMALE	Stage IV	T4	N2	M1	GSE39582
GSM972208	750	1	63	MALE	Stage IV	T4	N2	M1	GSE39582
GSM972281	1680	0	64	MALE	Stage I	T1	N0	M0	GSE39582
GSM972032	1800	0	64	FEMALE	Stage II	T3	N0	M0	GSE39582
GSM972125	2040	0	64	FEMALE	Stage II	T3	N0	M0	GSE39582
GSM972128	2790	0	64	MALE	Stage II	T3	N0	M0	GSE39582
GSM972149	3960	0	64	MALE	Stage II	T3	N0	M0	GSE39582
GSM972418	2100	0	64	MALE	Stage II	T3	N0	M0	GSE39582
GSM972140	5160	0	64	MALE	Stage II	T4	N0	M0	GSE39582
GSM972108	3090	0	64	MALE	Stage III	T4	N1	M0	GSE39582
GSM972395	4410	0	64	MALE	Stage III	T4	N1	M0	GSE39582
GSM972118	900	0	64	MALE	Stage III	T3	N2	M0	GSE39582
GSM972429	1860	0	64	MALE	Stage III	T4	N2	M0	GSE39582
GSM972133	1590	1	64	MALE	Stage III	T3	unknow	M0	GSE39582
GSM972070	2040	1	64	FEMALE	Stage II	T4	N0	M0	GSE39582
GSM972320	1740	1	64	MALE	Stage III	T2	N1	M0	GSE39582
GSM972097	360	1	64	MALE	Stage III	T4	N1	M0	GSE39582
GSM972112	960	1	64	FEMALE	Stage III	T3	N2	M0	GSE39582
GSM972380	450	1	64	FEMALE	Stage III	T3	N2	M0	GSE39582
GSM1681358	unknow	unknow	64	MALE	unknow	unknow	unknow	unknow	GSE39582
GSM972003	810	1	64.6	MALE	Stage IV	T3	N2	M1	GSE39582
GSM972496	4260	0	65	FEMALE	Stage I	T2	N0	M0	GSE39582
GSM1681354	4260	0	65	FEMALE	Stage I	T2	N0	M0	GSE39582
GSM972083	3810	0	65	FEMALE	Stage II	T3	N0	M0	GSE39582
GSM972283	1530	0	65	MALE	Stage II	T3	N0	M0	GSE39582
GSM972488	1470	0	65	MALE	Stage II	T3	N0	M0	GSE39582
GSM972374	2700	0	65	MALE	Stage III	T1	N1	M0	GSE39582
GSM972207	2460	0	65	MALE	Stage III	T3	N1	M0	GSE39582
GSM972211	1710	0	65	MALE	Stage III	T3	N1	M0	GSE39582
GSM972398	1920	1	65	MALE	Stage II	T3	N0	M0	GSE39582
GSM972458	510	1	65	MALE	Stage II	T3	N0	M0	GSE39582
GSM972039	1560	1	65	MALE	Stage IV	T4	N0	M1	GSE39582
GSM972439	60	1	65	MALE	Stage IV	T3	N1	M1	GSE39582
GSM972014	870	1	65.8	MALE	Stage IV	T3	N0	M1	GSE39582
GSM972127	2550	0	66	FEMALE	Stage II	T3	N0	M0	GSE39582
GSM972406	3180	0	66	FEMALE	Stage II	T3	N0	M0	GSE39582
GSM972060	2460	0	66	MALE	Stage II	T3	N0	M0	GSE39582
GSM972243	60	0	66	MALE	Stage II	T3	N0	M0	GSE39582
GSM972373	2370	0	66	MALE	Stage III	T3	N1	M0	GSE39582
GSM972203	1620	0	66	FEMALE	Stage III	T3	N2	M0	GSE39582
GSM972103	1740	0	66	MALE	Stage III	T3	N2	M0	GSE39582
GSM972352	4170	0	66	MALE	Stage III	T3	N2	M0	GSE39582
GSM972421	840	0	66	MALE	Stage III	unknow	unknow	unknow	GSE39582
GSM972408	960	1	66	MALE	Stage II	T3	N0	M0	GSE39582
GSM972413	600	1	66	MALE	Stage III	T3	N1	M0	GSE39582
GSM972098	450	1	66	MALE	Stage III	T4	N2	M0	GSE39582
GSM972180	720	1	66	FEMALE	Stage II	unknow	unknow	unknow	GSE39582
GSM972005	1320	0	66.1	MALE	Stage IV	T4	N1	M1	GSE39582
GSM971986	2040	0	66.3	MALE	Stage II	T3	N0	M0	GSE39582
GSM971979	1590	0	66.4	FEMALE	Stage II	T3	N0	M0	GSE39582
GSM971985	210	0	66.6	MALE	unknow	unknow	N0	M0	GSE39582
GSM971987	2040	0	66.7	MALE	Stage II	T3	N0	M0	GSE39582
GSM972094	1830	0	67	FEMALE	Stage II	T3	N0	M0	GSE39582
GSM972091	2100	0	67	MALE	Stage II	T3	N0	M0	GSE39582
GSM972233	450	0	67	MALE	Stage II	T3	N0	M0	GSE39582
GSM972473	3510	0	67	MALE	Stage II	T3	N0	M0	GSE39582
GSM972490	2220	0	67	MALE	Stage II	T3	N0	M0	GSE39582
GSM972268	1440	0	67	MALE	Stage III	T2	N1	M0	GSE39582
GSM972279	1560	0	67	FEMALE	Stage III	T3	N1	M0	GSE39582
GSM972323	2400	0	67	FEMALE	Stage III	T3	N1	M0	GSE39582
GSM972159	2790	0	67	MALE	Stage III	T3	N1	M0	GSE39582
GSM972339	2280	0	67	MALE	Stage III	T3	N1	M0	GSE39582
GSM1681367	2280	0	67	MALE	Stage III	T3	N1	M0	GSE39582
GSM972170	2190	0	67	FEMALE	Stage III	T2	N2	M0	GSE39582
GSM972240	420	0	67	FEMALE	Stage IV	T3	N1	M1	GSE39582
GSM972165	2610	1	67	MALE	Stage II	T4	N0	M0	GSE39582
GSM972156	3360	1	67	MALE	Stage III	T3	N1	M0	GSE39582
GSM972481	1950	1	67	MALE	Stage III	T3	N2	M0	GSE39582
GSM1681369	1950	1	67	MALE	Stage III	T3	N2	M0	GSE39582
GSM972463	60	1	67	MALE	Stage III	T4	N2	M0	GSE39582
GSM972446	unknow	unknow	67	MALE	Stage III	T3	N1	unknow	GSE39582
GSM972008	2160	1	67.3	MALE	Stage IV	T4	N2	M1	GSE39582
GSM971993	1680	0	67.5	MALE	Stage II	T3	N0	M0	GSE39582
GSM972006	690	1	67.5	FEMALE	Stage IV	T3	N0	M1	GSE39582
GSM972400	330	1	67.8	FEMALE	Stage IV	T4	N2	M1	GSE39582
GSM972052	450	0	68	MALE	Stage II	T2	N0	M0	GSE39582
GSM972071	5490	0	68	FEMALE	Stage II	T3	N0	M0	GSE39582
GSM972081	780	0	68	FEMALE	Stage II	T3	N0	M0	GSE39582
GSM972089	2610	0	68	FEMALE	Stage II	T3	N0	M0	GSE39582
GSM972410	2730	0	68	FEMALE	Stage II	T3	N0	M0	GSE39582
GSM972475	2610	0	68	FEMALE	Stage II	T3	N0	M0	GSE39582
GSM972069	6030	0	68	MALE	Stage II	T3	N0	M0	GSE39582
GSM972137	3870	0	68	MALE	Stage II	T3	N0	M0	GSE39582
GSM972190	3240	0	68	MALE	Stage II	T3	N0	M0	GSE39582
GSM972228	30	0	68	MALE	Stage II	T3	N0	M0	GSE39582
GSM972404	1440	0	68	MALE	Stage II	T3	N0	M0	GSE39582
GSM972484	2280	0	68	MALE	Stage II	T3	N0	M0	GSE39582
GSM972506	4230	0	68	MALE	Stage II	T3	N0	M0	GSE39582
GSM971984	2430	0	68	FEMALE	Stage II	T4	N0	M0	GSE39582
GSM972363	4200	0	68	FEMALE	Stage III	T3	N1	M0	GSE39582
GSM972295	1830	0	68	MALE	Stage III	T4	N1	M0	GSE39582
GSM972018	3510	0	68	FEMALE	Stage III	T2	N2	M0	GSE39582
GSM972030	1560	0	68	FEMALE	Stage III	T3	N3	M0	GSE39582
GSM972391	1560	1	68	MALE	Stage II	T3	N0	M0	GSE39582
GSM972354	2850	1	68	FEMALE	Stage III	T3	N2	M0	GSE39582
GSM972009	300	1	68.1	MALE	Stage IV	T3	N2	M1	GSE39582
GSM972508	4020	0	69	FEMALE	Stage I	T1	N0	M0	GSE39582
GSM1681356	4020	0	69	FEMALE	Stage I	T1	N0	M0	GSE39582
GSM972242	510	0	69	MALE	Stage I	T2	N0	M0	GSE39582
GSM972469	2580	0	69	MALE	Stage I	T2	N0	M0	GSE39582
GSM972492	2040	0	69	MALE	Stage I	T2	N0	M0	GSE39582
GSM1681362	2580	0	69	MALE	Stage I	T2	N0	M0	GSE39582
GSM1681371	2040	0	69	MALE	Stage I	T2	N0	M0	GSE39582
GSM972196	2190	0	69	FEMALE	Stage II	T3	N0	M0	GSE39582
GSM972222	1710	0	69	FEMALE	Stage II	T3	N0	M0	GSE39582
GSM972338	2220	0	69	MALE	Stage II	T3	N0	M0	GSE39582
GSM972485	2250	0	69	MALE	Stage II	T3	N0	M0	GSE39582
GSM972502	3930	0	69	MALE	Stage II	T3	N0	M0	GSE39582
GSM972505	4320	0	69	MALE	Stage II	T3	N0	M0	GSE39582
GSM1681353	3930	0	69	MALE	Stage II	T3	N0	M0	GSE39582
GSM972139	3060	0	69	FEMALE	Stage III	T3	N1	M0	GSE39582
GSM972066	1470	0	69	MALE	Stage IV	T4	N0	M1	GSE39582
GSM972232	630	0	69	MALE	Stage IV	T4	N2	M1	GSE39582
GSM972178	2010	0	69	FEMALE	Stage III	unknow	unknow	unknow	GSE39582
GSM972401	0	1	69	MALE	Stage II	T3	N0	M0	GSE39582
GSM972495	810	1	69	FEMALE	Stage III	T3	N1	M0	GSE39582
GSM972415	1260	1	69	MALE	Stage III	T3	N1	M0	GSE39582
GSM972181	1020	1	69	MALE	Stage III	unknow	unknow	unknow	GSE39582
GSM972290	1170	0	70	FEMALE	Stage I	T2	N0	M0	GSE39582
GSM972269	2370	0	70	MALE	Stage I	T2	N0	M0	GSE39582
GSM972344	2250	0	70	FEMALE	Stage II	T3	N0	M0	GSE39582
GSM972383	2760	0	70	FEMALE	Stage II	T3	N0	M0	GSE39582
GSM972403	1680	0	70	FEMALE	Stage II	T3	N0	M0	GSE39582
GSM972460	2880	0	70	FEMALE	Stage II	T3	N0	M0	GSE39582
GSM972306	1680	0	70	MALE	Stage II	T3	N0	M0	GSE39582
GSM972385	1890	0	70	MALE	Stage II	T3	N0	M0	GSE39582
GSM972424	3120	0	70	MALE	Stage II	T3	N0	M0	GSE39582
GSM972072	5160	0	70	FEMALE	Stage II	T4	N0	M0	GSE39582
GSM972152	1680	0	70	FEMALE	Stage III	T3	N1	M0	GSE39582
GSM972368	2760	0	70	FEMALE	Stage III	T3	N1	M0	GSE39582
GSM972171	3900	0	70	FEMALE	Stage III	T4	N1	M0	GSE39582
GSM972027	2820	0	70	FEMALE	Stage III	T3	N2	M0	GSE39582
GSM972260	390	0	70	MALE	Stage IV	T3	N2	M1	GSE39582
GSM972164	2070	1	70	MALE	Stage III	T3	unknow	M0	GSE39582
GSM972057	780	1	70	MALE	Stage II	T3	N0	M0	GSE39582
GSM972074	2250	1	70	FEMALE	Stage II	T4	N0	M0	GSE39582
GSM972405	2370	1	70	FEMALE	Stage II	T4	N0	M0	GSE39582
GSM972184	1170	1	70	FEMALE	Stage II	unknow	unknow	unknow	GSE39582
GSM972434	1260	1	70	MALE	Stage II	unknow	unknow	unknow	GSE39582
GSM972307	2460	0	71	FEMALE	Stage II	T3	N0	M0	GSE39582
GSM972326	2550	0	71	FEMALE	Stage II	T3	N0	M0	GSE39582
GSM1681364	2550	0	71	FEMALE	Stage II	T3	N0	M0	GSE39582
GSM972447	930	0	71	MALE	Stage II	T3	N0	M0	GSE39582
GSM972163	1230	0	71	MALE	Stage II	T4	N0	M0	GSE39582
GSM972351	720	0	71	MALE	Stage II	T4	N0	M0	GSE39582
GSM972364	3090	0	71	FEMALE	Stage III	T3	N1	M0	GSE39582
GSM972100	750	0	71	FEMALE	Stage III	T4	N2	M0	GSE39582
GSM972236	360	0	71	MALE	Stage IV	T1	N0	M1	GSE39582
GSM972432	1650	0	71	MALE	Stage III	unknow	unknow	unknow	GSE39582
GSM972435	1200	0	71	MALE	Stage III	unknow	unknow	unknow	GSE39582
GSM972285	60	1	71	MALE	Stage II	T2	N0	M0	GSE39582
GSM972319	2340	1	71	FEMALE	Stage II	T3	N0	M0	GSE39582
GSM972153	1980	1	71	MALE	Stage II	T3	N0	M0	GSE39582
GSM972312	2910	1	71	MALE	Stage II	T3	N0	M0	GSE39582
GSM972402	930	1	71	MALE	Stage II	T3	N0	M1	GSE39582
GSM972213	30	1	71	FEMALE	Stage IV	T3	N0	M1	GSE39582
GSM972045	330	1	71	MALE	Stage IV	T3	N0	M1	GSE39582
GSM972007	60	1	71	MALE	Stage IV	T4	N2	M1	GSE39582
GSM972177	660	1	71	MALE	Stage II	unknow	unknow	unknow	GSE39582
GSM971989	720	1	71.3	MALE	Stage I	T2	N0	M0	GSE39582
GSM971991	1650	1	71.3	MALE	Stage II	T3	N0	M0	GSE39582
GSM971978	3270	0	71.4	FEMALE	Stage I	T2	N0	M0	GSE39582
GSM972001	2190	0	71.5	MALE	Stage III	T2	N1	M0	GSE39582
GSM972278	1350	0	72	FEMALE	Stage I	T2	N0	M0	GSE39582
GSM972462	2640	0	72	MALE	Stage I	T2	N0	M0	GSE39582
GSM972090	2070	0	72	FEMALE	Stage II	T3	N0	M0	GSE39582
GSM972192	4740	0	72	FEMALE	Stage II	T3	N0	M0	GSE39582
GSM972332	2610	0	72	FEMALE	Stage II	T3	N0	M0	GSE39582
GSM972515	3540	0	72	FEMALE	Stage II	T3	N0	M0	GSE39582
GSM972324	2460	0	72	MALE	Stage II	T3	N0	M0	GSE39582
GSM972396	3210	0	72	MALE	Stage II	T3	N0	M0	GSE39582
GSM972259	870	0	72	FEMALE	Stage II	T4	N0	M0	GSE39582
GSM972409	3120	0	72	FEMALE	Stage II	T4	N0	M0	GSE39582
GSM972425	1770	0	72	FEMALE	Stage III	T3	N1	M0	GSE39582
GSM972367	2850	0	72	MALE	Stage III	T3	N1	M0	GSE39582
GSM971997	2670	0	72	MALE	Stage III	T3	N2	M0	GSE39582
GSM972104	1230	0	72	FEMALE	Stage III	T3	N3	M0	GSE39582
GSM972355	1020	1	72	MALE	Stage II	T3	N0	M0	GSE39582
GSM972361	570	1	72	FEMALE	Stage III	T4	N2	M0	GSE39582
GSM972289	510	1	72	MALE	Stage IV	T4	N1	M1	GSE39582
GSM1681366	unknow	unknow	72	MALE	unknow	unknow	unknow	unknow	GSE39582
GSM972509	420	0	73	FEMALE	Stage I	T2	N0	M0	GSE39582
GSM972084	3870	0	73	FEMALE	Stage II	T3	N0	M0	GSE39582
GSM972347	210	0	73	FEMALE	Stage II	T3	N0	M0	GSE39582
GSM972160	2310	0	73	MALE	Stage II	T3	N0	M0	GSE39582
GSM972088	2370	0	73	FEMALE	Stage II	T4	N0	M0	GSE39582
GSM972162	2310	0	73	FEMALE	Stage III	T3	N1	M0	GSE39582
GSM972466	2250	0	73	FEMALE	Stage III	T3	N1	M0	GSE39582
GSM972114	1380	0	73	MALE	Stage III	T3	N1	M0	GSE39582
GSM972017	1290	0	73	FEMALE	Stage III	T3	N2	M0	GSE39582
GSM972376	2610	0	73	FEMALE	Stage III	T3	N2	M0	GSE39582
GSM972199	1980	0	73	MALE	Stage III	T3	N2	M0	GSE39582
GSM972215	1410	0	73	FEMALE	Stage III	T4	N2	M0	GSE39582
GSM972217	2100	0	73	MALE	Stage IV	T3	N1	M1	GSE39582
GSM972335	1380	1	73	MALE	Stage I	T2	N0	M0	GSE39582
GSM972356	1590	1	73	FEMALE	Stage II	T3	N0	M0	GSE39582
GSM972465	2520	1	73	MALE	Stage II	T3	N0	M0	GSE39582
GSM972468	720	1	73	MALE	Stage II	T3	N0	M0	GSE39582
GSM972370	2130	1	73	FEMALE	Stage III	T3	N1	M0	GSE39582
GSM972444	420	1	73	MALE	Stage III	T4	N2	unknow	GSE39582
GSM972471	unknow	unknow	73	FEMALE	Stage I	T2	N0	M0	GSE39582
GSM972249	420	0	74	FEMALE	Stage I	T1	N0	M0	GSE39582
GSM972294	750	0	74	MALE	Stage II	T3	N0	M0	GSE39582
GSM972491	2100	0	74	MALE	Stage II	T3	N0	M0	GSE39582
GSM972457	2040	0	74	FEMALE	Stage III	T3	N1	M0	GSE39582
GSM972328	2460	0	74	MALE	Stage III	T3	N2	M0	GSE39582
GSM972206	1260	0	74	MALE	Stage II	unknow	unknow	unknow	GSE39582
GSM972134	420	1	74	MALE	Stage III	T3	N2	M0	GSE39582
GSM972301	3150	1	74	MALE	Stage III	T3	N2	M0	GSE39582
GSM972224	750	1	74	MALE	Stage III	T4	N2	M0	GSE39582
GSM972422	1110	1	74	MALE	Stage II	unknow	unknow	unknow	GSE39582
GSM972448	unknow	unknow	74	FEMALE	Stage II	T3	N0	M0	GSE39582
GSM972500	unknow	unknow	74	FEMALE	Stage II	T3	N0	M0	GSE39582
GSM972016	480	1	74.5	FEMALE	Stage II	T3	N0	M0	GSE39582
GSM972010	1380	1	74.5	MALE	Stage IV	T3	N1	M1	GSE39582
GSM971998	690	1	74.8	MALE	Stage III	T3	N1	M0	GSE39582
GSM972050	570	0	75	FEMALE	Stage II	T3	N0	M0	GSE39582
GSM972058	1800	0	75	FEMALE	Stage II	T3	N0	M0	GSE39582
GSM972221	1950	0	75	FEMALE	Stage II	T3	N0	M0	GSE39582
GSM972340	2520	0	75	MALE	Stage II	T3	N0	M0	GSE39582
GSM972477	2430	0	75	MALE	Stage II	T3	N0	M0	GSE39582
GSM972270	1950	0	75	FEMALE	Stage II	T4	N0	M0	GSE39582
GSM972300	1230	0	75	MALE	unknow	Tis	N0	M0	GSE39582
GSM972151	2310	0	75	FEMALE	Stage III	T3	N1	M0	GSE39582
GSM972174	2910	0	75	MALE	Stage III	T3	N1	M0	GSE39582
GSM972452	2970	0	75	FEMALE	Stage III	T3	N2	M0	GSE39582
GSM972388	2490	1	75	FEMALE	Stage II	T3	N0	M0	GSE39582
GSM972082	3960	1	75	MALE	Stage II	T3	N0	M0	GSE39582
GSM972392	1320	1	75	FEMALE	Stage II	T4	N0	M0	GSE39582
GSM972026	1020	1	75	MALE	Stage III	T3	N2	M0	GSE39582
GSM972511	1410	1	75	MALE	Stage III	T3	N2	M0	GSE39582
GSM972218	210	1	75	FEMALE	Stage IV	T4	N3	M1	GSE39582
GSM971983	2610	0	75.3	MALE	Stage III	T3	N1	M0	GSE39582
GSM972011	600	1	75.3	FEMALE	Stage IV	T4	N1	M1	GSE39582
GSM972464	2580	0	76	FEMALE	Stage I	T2	N0	M0	GSE39582
GSM1681361	2580	0	76	FEMALE	Stage I	T2	N0	M0	GSE39582
GSM972129	330	0	76	MALE	Stage II	T2	N0	M0	GSE39582
GSM972059	1770	0	76	FEMALE	Stage II	T3	N0	M0	GSE39582
GSM972092	1410	0	76	FEMALE	Stage II	T3	N0	M0	GSE39582
GSM972130	1650	0	76	MALE	Stage II	T4	N0	M0	GSE39582
GSM972022	2460	0	76	FEMALE	Stage III	T3	N2	M0	GSE39582
GSM972168	240	1	76	MALE	Stage III	T4	unknow	M0	GSE39582
GSM972393	1410	1	76	MALE	Stage II	T3	N0	M0	GSE39582
GSM972275	120	1	76	MALE	Stage II	T4	N0	M0	GSE39582
GSM972501	3180	1	76	FEMALE	Stage III	T3	N1	M0	GSE39582
GSM972107	1800	1	76	MALE	Stage III	T3	N1	M0	GSE39582
GSM972520	1860	1	76	MALE	Stage III	T3	N1	M0	GSE39582
GSM972110	210	1	76	MALE	Stage III	T4	N2	M0	GSE39582
GSM972205	1050	1	76	MALE	Stage II	unknow	unknow	unknow	GSE39582
GSM972000	270	0	76.4	FEMALE	Stage III	T3	N2	M0	GSE39582
GSM971980	1770	0	76.9	MALE	Stage III	T4	N1	M0	GSE39582
GSM972316	2490	0	77	FEMALE	Stage II	T3	N0	M0	GSE39582
GSM972386	2700	0	77	FEMALE	Stage II	T3	N0	M0	GSE39582
GSM972489	2220	0	77	FEMALE	Stage II	T3	N0	M0	GSE39582
GSM1681370	2220	0	77	FEMALE	Stage II	T3	N0	M0	GSE39582
GSM972034	1500	0	77	MALE	Stage II	T3	N0	M0	GSE39582
GSM972287	1290	0	77	MALE	Stage II	T3	N0	M0	GSE39582
GSM972389	2790	0	77	MALE	Stage II	T4	N0	M0	GSE39582
GSM972296	660	0	77	FEMALE	unknow	Tis	N0	M0	GSE39582
GSM972497	30	0	77	FEMALE	Stage III	T2	N1	M0	GSE39582
GSM972254	420	0	77	FEMALE	Stage IV	T3	N0	M1	GSE39582
GSM972297	1380	1	77	MALE	Stage I	T1	N0	M0	GSE39582
GSM972138	1590	1	77	MALE	Stage II	T3	N0	M0	GSE39582
GSM972258	0	1	77	FEMALE	Stage II	T4	N0	M0	GSE39582
GSM972245	0	1	77	MALE	Stage IV	T4	N1	M1	GSE39582
GSM972179	540	1	77	MALE	Stage II	unknow	unknow	unknow	GSE39582
GSM971988	540	1	77.2	FEMALE	Stage IV	T4	N1	M1	GSE39582
GSM972002	780	0	77.8	MALE	Stage III	T4	N1	M0	GSE39582
GSM972342	840	0	78	MALE	Stage I	T2	N0	M0	GSE39582
GSM972131	2580	0	78	FEMALE	Stage II	T3	N0	M0	GSE39582
GSM972197	1500	0	78	FEMALE	Stage II	T3	N0	M0	GSE39582
GSM972041	1650	0	78	MALE	Stage II	T3	N0	M0	GSE39582
GSM972309	2850	0	78	MALE	Stage II	T3	N0	M0	GSE39582
GSM972480	2070	0	78	MALE	Stage II	T3	N0	M0	GSE39582
GSM972056	2760	0	78	FEMALE	Stage II	T4	N0	M0	GSE39582
GSM972037	990	0	78	MALE	Stage II	T4	N0	M0	GSE39582
GSM972117	960	0	78	FEMALE	Stage III	T3	N1	M0	GSE39582
GSM972265	1800	0	78	FEMALE	Stage III	T3	N1	M0	GSE39582
GSM972099	450	0	78	MALE	Stage III	T3	N1	M0	GSE39582
GSM972201	2010	0	78	MALE	Stage III	T3	N2	M0	GSE39582
GSM972378	2580	0	78	MALE	Stage III	T3	N2	M0	GSE39582
GSM1681365	2580	0	78	MALE	Stage III	T3	N2	M0	GSE39582
GSM972204	1320	0	78	MALE	Stage II	unknow	unknow	unknow	GSE39582
GSM972135	390	1	78	FEMALE	Stage II	T3	N0	M0	GSE39582
GSM972223	990	1	78	MALE	Stage II	T3	N0	M0	GSE39582
GSM972061	1290	1	78	FEMALE	Stage II	T4	N0	M0	GSE39582
GSM972412	240	1	78	MALE	Stage III	T3	N2	M0	GSE39582
GSM971963	600	1	78.2	MALE	Stage II	T3	N0	M0	GSE39582
GSM972282	1530	0	79	FEMALE	Stage I	T2	N0	M0	GSE39582
GSM972330	2580	0	79	FEMALE	Stage II	T3	N0	M0	GSE39582
GSM972049	780	0	79	MALE	Stage II	T3	N0	M0	GSE39582
GSM972147	4200	0	79	MALE	Stage II	T3	N0	M0	GSE39582
GSM972247	180	0	79	MALE	Stage II	T4	N0	M0	GSE39582
GSM972308	2760	0	79	FEMALE	Stage III	T3	N1	M0	GSE39582
GSM972334	2310	0	79	FEMALE	Stage III	T3	N2	M0	GSE39582
GSM972479	90	0	79	MALE	Stage III	T4	N2	M0	GSE39582
GSM972331	2250	1	79	MALE	Stage II	T3	N0	M0	GSE39582
GSM972280	1380	1	79	FEMALE	Stage II	T4	N0	M0	GSE39582
GSM972514	960	1	79	FEMALE	Stage III	T2	N1	M0	GSE39582
GSM972261	210	1	79	FEMALE	Stage III	T4	N1	M0	GSE39582
GSM972349	150	1	79	FEMALE	Stage III	T4	N1	M0	GSE39582
GSM972302	810	1	79	MALE	Stage III	T4	N1	M0	GSE39582
GSM972116	870	1	79	FEMALE	Stage III	T3	N2	M0	GSE39582
GSM972234	300	1	79	MALE	Stage IV	T3	N1	M1	GSE39582
GSM971982	1260	1	79.3	MALE	Stage III	T4	N2	M0	GSE39582
GSM972303	570	0	80	FEMALE	Stage I	T2	N0	M0	GSE39582
GSM972073	4890	0	80	FEMALE	Stage II	T3	N0	M0	GSE39582
GSM972459	360	0	80	MALE	Stage II	T3	N0	M0	GSE39582
GSM972478	2070	0	80	MALE	Stage II	T3	N0	M0	GSE39582
GSM972310	750	0	80	FEMALE	Stage III	T3	N1	M0	GSE39582
GSM972483	840	1	80	FEMALE	Stage II	T3	N0	M0	GSE39582
GSM972450	1410	1	80	MALE	Stage II	T3	N0	M0	GSE39582
GSM972337	1230	1	80	FEMALE	Stage III	T3	N1	M0	GSE39582
GSM972504	900	1	80	MALE	Stage III	T3	N2	M0	GSE39582
GSM971994	1290	0	80.9	MALE	Stage II	T3	N0	M0	GSE39582
GSM972229	0	0	81	FEMALE	Stage II	T3	N0	M0	GSE39582
GSM972255	150	0	81	FEMALE	Stage II	T3	N0	M0	GSE39582
GSM972031	1650	0	81	MALE	Stage II	T3	N0	M0	GSE39582
GSM972040	1890	0	81	MALE	Stage II	T3	N0	M0	GSE39582
GSM972220	30	0	81	MALE	Stage III	T3	N1	M0	GSE39582
GSM972086	1290	1	81	MALE	Stage II	T3	N0	M0	GSE39582
GSM972394	330	1	81	MALE	Stage III	T3	N1	M0	GSE39582
GSM972436	540	1	81	MALE	Stage II	unknow	unknow	unknow	GSE39582
GSM971981	1440	0	81.8	MALE	Stage II	T3	N0	M0	GSE39582
GSM972054	780	0	82	MALE	Stage II	T3	N0	M0	GSE39582
GSM972516	1980	0	82	MALE	Stage II	T3	N0	M0	GSE39582
GSM972305	930	0	82	FEMALE	Stage III	T4	N2	M0	GSE39582
GSM972499	2160	0	82	MALE	Stage III	T4	N2	M0	GSE39582
GSM972456	0	1	82	FEMALE	Stage II	T3	N0	M0	GSE39582
GSM972267	2010	1	82	MALE	Stage II	T3	N0	M0	GSE39582
GSM972346	2160	1	82	FEMALE	Stage III	T3	N1	M0	GSE39582
GSM972518	1050	1	82	FEMALE	Stage III	T4	N1	M0	GSE39582
GSM972298	270	0	83	FEMALE	Stage II	T3	N0	M0	GSE39582
GSM972397	3150	0	83	FEMALE	Stage II	T3	N0	M0	GSE39582
GSM972042	1530	0	83	MALE	Stage II	T3	N0	M0	GSE39582
GSM972507	1260	0	83	FEMALE	Stage III	T3	N1	M0	GSE39582
GSM972313	2730	1	83	FEMALE	Stage I	T2	N0	M0	GSE39582
GSM972067	5490	1	83	FEMALE	Stage II	T3	N0	M0	GSE39582
GSM972175	1290	1	83	FEMALE	Stage III	T3	N1	M0	GSE39582
GSM972345	1260	1	83	MALE	Stage III	T3	N2	M0	GSE39582
GSM972420	180	1	83	MALE	Stage III	T3	N2	M0	GSE39582
GSM971990	360	1	83.1	MALE	Stage I	T2	N0	M0	GSE39582
GSM972487	2010	0	84	MALE	Stage II	T3	N0	M0	GSE39582
GSM972087	960	1	84	FEMALE	Stage II	T3	N0	M0	GSE39582
GSM972318	1080	1	84	FEMALE	Stage II	T3	N0	M0	GSE39582
GSM1681359	1080	1	84	FEMALE	Stage II	T3	N0	M0	GSE39582
GSM972273	480	1	84	MALE	unknow	Tis	N0	M0	GSE39582
GSM972350	270	1	84	FEMALE	Stage III	T3	N1	M0	GSE39582
GSM972317	900	1	85	MALE	Stage II	T3	N0	M0	GSE39582
GSM1681360	900	1	85	MALE	Stage II	T3	N0	M0	GSE39582
GSM972513	1440	1	85	MALE	Stage III	T3	N1	M0	GSE39582
GSM972419	960	1	85	FEMALE	Stage III	T3	N2	M0	GSE39582
GSM972176	1080	1	85	FEMALE	Stage III	T4	N2	M0	GSE39582
GSM972433	480	1	85	MALE	Stage III	unknow	unknow	unknow	GSE39582
GSM971992	600	1	85.6	MALE	Stage II	T4	N0	M0	GSE39582
GSM972314	1380	0	86	FEMALE	Stage III	T3	N1	M0	GSE39582
GSM972343	1560	1	86	MALE	Stage II	T3	N0	M0	GSE39582
GSM972142	1050	1	86	FEMALE	Stage III	T3	N2	M0	GSE39582
GSM972012	3030	0	86.8	FEMALE	Stage IV	T3	N1	M1	GSE39582
GSM972486	990	0	87	MALE	Stage II	T3	N0	M0	GSE39582
GSM972132	1830	1	87	FEMALE	Stage II	T3	N0	M0	GSE39582
GSM972390	240	1	87	MALE	Stage III	T3	N1	M0	GSE39582
GSM972277	1530	0	88	FEMALE	Stage II	T4	N0	M0	GSE39582
GSM972262	150	0	88	FEMALE	Stage II	T4	N0	unknow	GSE39582
GSM972357	1260	1	88	FEMALE	Stage II	T3	N0	M0	GSE39582
GSM972517	1110	1	88	FEMALE	Stage II	T3	N0	M0	GSE39582
GSM972172	150	1	88	FEMALE	Stage II	T4	N0	M0	GSE39582
GSM972257	630	1	88	FEMALE	Stage II	T4	N0	M0	GSE39582
GSM972214	60	1	88	FEMALE	Stage IV	T3	N2	M1	GSE39582
GSM972493	1770	0	89	FEMALE	Stage II	T3	N0	M0	GSE39582
GSM972510	2580	0	89	MALE	Stage II	T3	N0	M0	GSE39582
GSM972341	2070	0	89	FEMALE	Stage III	T3	N1	M0	GSE39582
GSM972455	2220	0	89	FEMALE	Stage III	T3	N1	M0	GSE39582
GSM972013	1290	1	89.4	FEMALE	Stage IV	T2	N1	M1	GSE39582
GSM972482	1260	0	90	FEMALE	Stage II	T3	N0	M0	GSE39582
GSM972521	2280	1	90	FEMALE	Stage II	T3	N0	M0	GSE39582
GSM972274	1710	0	91	FEMALE	Stage III	T4	N2	M0	GSE39582
GSM972161	330	1	91	FEMALE	Stage II	T3	N0	M0	GSE39582
GSM972246	0	0	92	FEMALE	Stage III	T3	N1	M0	GSE39582
GSM972271	420	1	92	MALE	Stage III	T4	N1	M0	GSE39582
GSM972015	2730	0	92.4	FEMALE	Stage II	T3	N0	M0	GSE39582
GSM972047	990	0	93	FEMALE	Stage II	T3	N0	M0	GSE39582
GSM972035	1170	0	94	FEMALE	Stage II	T3	N0	M0	GSE39582
GSM972106	2160	0	96	FEMALE	Stage III	T3	N1	M0	GSE39582
GSM972120	1080	0	96	FEMALE	Stage III	T3	N1	M0	GSE39582
GSM972109	1080	0	96	MALE	Stage III	T3	N1	M0	GSE39582
GSM972121	1050	0	96	MALE	Stage III	T3	N1	M0	GSE39582
GSM972119	1110	0	96	MALE	Stage III	T4	N1	M0	GSE39582
GSM972122	570	1	97	FEMALE	Stage III	T4	N1	M0	GSE39582
GSM972293	1500	0	unknow	MALE	Stage I	T2	N0	M0	GSE39582
GSM437093	4276.5	0	73	MALE	Stage I	unknow	unknow	unknow	GSE17536
GSM437094	3681.6	0	63	MALE	Stage I	unknow	unknow	unknow	GSE17536
GSM437095	868.8	1	51	MALE	Stage I	unknow	unknow	unknow	GSE17536
GSM437096	3576.3	0	56	FEMALE	Stage I	unknow	unknow	unknow	GSE17536
GSM437097	1785.9	0	50	MALE	Stage I	unknow	unknow	unknow	GSE17536
GSM437098	2064.3	1	63	FEMALE	Stage I	unknow	unknow	unknow	GSE17536
GSM437099	2468.7	0	66	MALE	Stage I	unknow	unknow	unknow	GSE17536
GSM437100	3324.6	0	63	MALE	Stage I	unknow	unknow	unknow	GSE17536
GSM437101	1976.4	1	88	MALE	Stage I	unknow	unknow	unknow	GSE17536
GSM437102	2523.9	0	66	MALE	Stage I	unknow	unknow	unknow	GSE17536
GSM437103	494.1	1	80	FEMALE	Stage I	unknow	unknow	unknow	GSE17536
GSM437104	2692.5	0	62	MALE	Stage I	unknow	unknow	unknow	GSE17536
GSM437105	2282.1	0	82	MALE	Stage I	unknow	unknow	unknow	GSE17536
GSM437106	2034.6	0	78	FEMALE	Stage I	unknow	unknow	unknow	GSE17536
GSM437107	1567.2	0	76	MALE	Stage I	unknow	unknow	unknow	GSE17536
GSM437108	1923	0	87	FEMALE	Stage I	unknow	unknow	unknow	GSE17536
GSM437109	1653.9	0	74	FEMALE	Stage I	unknow	unknow	unknow	GSE17536
GSM437110	1733.7	0	55	MALE	Stage I	unknow	unknow	unknow	GSE17536
GSM437111	1503	0	71	MALE	Stage I	unknow	unknow	unknow	GSE17536
GSM437112	1313.7	0	86	FEMALE	Stage I	unknow	unknow	unknow	GSE17536
GSM437113	908.1	0	58	MALE	Stage I	unknow	unknow	unknow	GSE17536
GSM437114	109.2	0	78	MALE	Stage I	unknow	unknow	unknow	GSE17536
GSM437115	1097.7	0	57	MALE	Stage I	unknow	unknow	unknow	GSE17536
GSM437116	600.6	0	81	MALE	Stage I	unknow	unknow	unknow	GSE17536
GSM437117	3557.4	0	74	FEMALE	Stage II	unknow	unknow	unknow	GSE17536
GSM437118	1659.9	0	77	FEMALE	Stage II	unknow	unknow	unknow	GSE17536
GSM437119	4045.8	1	41	MALE	Stage II	unknow	unknow	unknow	GSE17536
GSM437120	3818.7	0	43	FEMALE	Stage II	unknow	unknow	unknow	GSE17536
GSM437121	3618.6	0	51	FEMALE	Stage II	unknow	unknow	unknow	GSE17536
GSM437122	3208.2	0	70	MALE	Stage II	unknow	unknow	unknow	GSE17536
GSM437123	351	1	78	FEMALE	Stage II	unknow	unknow	unknow	GSE17536
GSM437124	863.7	1	80	MALE	Stage II	unknow	unknow	unknow	GSE17536
GSM437125	804.6	1	66	MALE	Stage II	unknow	unknow	unknow	GSE17536
GSM437126	1575	1	76	FEMALE	Stage II	unknow	unknow	unknow	GSE17536
GSM437127	720.9	1	58	FEMALE	Stage II	unknow	unknow	unknow	GSE17536
GSM437128	2669.7	0	74	MALE	Stage II	unknow	unknow	unknow	GSE17536
GSM437129	3073.2	0	49	MALE	Stage II	unknow	unknow	unknow	GSE17536
GSM437130	1011.9	1	54	FEMALE	Stage II	unknow	unknow	unknow	GSE17536
GSM437131	2558.4	0	71	FEMALE	Stage II	unknow	unknow	unknow	GSE17536
GSM437132	795.9	0	79	FEMALE	Stage II	unknow	unknow	unknow	GSE17536
GSM437133	1119.3	1	75	FEMALE	Stage II	unknow	unknow	unknow	GSE17536
GSM437134	2592.9	0	74	FEMALE	Stage II	unknow	unknow	unknow	GSE17536
GSM437135	1677.6	0	74	FEMALE	Stage II	unknow	unknow	unknow	GSE17536
GSM437136	2119.5	0	83	FEMALE	Stage II	unknow	unknow	unknow	GSE17536
GSM437137	2281.2	0	73	MALE	Stage II	unknow	unknow	unknow	GSE17536
GSM437138	2373.9	0	57	FEMALE	Stage II	unknow	unknow	unknow	GSE17536
GSM437139	2519.7	0	65	FEMALE	Stage II	unknow	unknow	unknow	GSE17536
GSM437140	2407.5	0	86	FEMALE	Stage II	unknow	unknow	unknow	GSE17536
GSM437141	1218	0	89	FEMALE	Stage II	unknow	unknow	unknow	GSE17536
GSM437142	2861.1	0	56	FEMALE	Stage II	unknow	unknow	unknow	GSE17536
GSM437143	931.8	1	86	FEMALE	Stage II	unknow	unknow	unknow	GSE17536
GSM437144	1119.3	1	71	MALE	Stage II	unknow	unknow	unknow	GSE17536
GSM437145	660.6	1	78	FEMALE	Stage II	unknow	unknow	unknow	GSE17536
GSM437146	1897.5	0	76	MALE	Stage II	unknow	unknow	unknow	GSE17536
GSM437147	1022.7	0	66	FEMALE	Stage II	unknow	unknow	unknow	GSE17536
GSM437148	1564.2	0	65	FEMALE	Stage II	unknow	unknow	unknow	GSE17536
GSM437149	1981.2	0	74	FEMALE	Stage II	unknow	unknow	unknow	GSE17536
GSM437150	1798.8	0	67	MALE	Stage II	unknow	unknow	unknow	GSE17536
GSM437151	1435.8	0	56	MALE	Stage II	unknow	unknow	unknow	GSE17536
GSM437152	1753.5	0	48	FEMALE	Stage II	unknow	unknow	unknow	GSE17536
GSM437153	1379.7	0	68	MALE	Stage II	unknow	unknow	unknow	GSE17536
GSM437154	1812.6	0	71	MALE	Stage II	unknow	unknow	unknow	GSE17536
GSM437155	1130.1	0	38	FEMALE	Stage II	unknow	unknow	unknow	GSE17536
GSM437156	471.3	0	73	MALE	Stage II	unknow	unknow	unknow	GSE17536
GSM437157	1177.5	0	59	FEMALE	Stage II	unknow	unknow	unknow	GSE17536
GSM437158	1496.1	0	76	FEMALE	Stage II	unknow	unknow	unknow	GSE17536
GSM437159	757.2	0	71	MALE	Stage II	unknow	unknow	unknow	GSE17536
GSM437160	1349.1	0	58	MALE	Stage II	unknow	unknow	unknow	GSE17536
GSM437161	1077	0	60	MALE	Stage II	unknow	unknow	unknow	GSE17536
GSM437162	799.8	0	71	MALE	Stage II	unknow	unknow	unknow	GSE17536
GSM437163	1103.4	0	64	FEMALE	Stage II	unknow	unknow	unknow	GSE17536
GSM437164	1245.6	0	84	FEMALE	Stage II	unknow	unknow	unknow	GSE17536
GSM437165	666.6	0	87	FEMALE	Stage II	unknow	unknow	unknow	GSE17536
GSM437166	996	0	51	MALE	Stage II	unknow	unknow	unknow	GSE17536
GSM437167	1190.4	0	69	MALE	Stage II	unknow	unknow	unknow	GSE17536
GSM437168	768.3	0	78	MALE	Stage II	unknow	unknow	unknow	GSE17536
GSM437169	2519.7	0	65	FEMALE	Stage II	unknow	unknow	unknow	GSE17536
GSM437170	451.5	0	54	MALE	Stage II	unknow	unknow	unknow	GSE17536
GSM437171	251.4	0	40	FEMALE	Stage II	unknow	unknow	unknow	GSE17536
GSM437172	545.4	0	68	MALE	Stage II	unknow	unknow	unknow	GSE17536
GSM437173	814.5	1	52	FEMALE	Stage II	unknow	unknow	unknow	GSE17536
GSM437174	727.8	1	46	MALE	Stage III	unknow	unknow	unknow	GSE17536
GSM437175	3155.1	0	39	MALE	Stage III	unknow	unknow	unknow	GSE17536
GSM437176	352.8	1	38	MALE	Stage III	unknow	unknow	unknow	GSE17536
GSM437177	2113.5	1	26	MALE	Stage III	unknow	unknow	unknow	GSE17536
GSM437178	2852.1	0	71	FEMALE	Stage III	unknow	unknow	unknow	GSE17536
GSM437179	3369.9	0	64	FEMALE	Stage III	unknow	unknow	unknow	GSE17536
GSM437180	825.3	1	53	MALE	Stage III	unknow	unknow	unknow	GSE17536
GSM437181	1377.6	1	53	FEMALE	Stage III	unknow	unknow	unknow	GSE17536
GSM437182	1621.2	1	92	FEMALE	Stage III	unknow	unknow	unknow	GSE17536
GSM437183	3119.4	0	60	MALE	Stage III	unknow	unknow	unknow	GSE17536
GSM437184	183.3	1	74	MALE	Stage III	unknow	unknow	unknow	GSE17536
GSM437185	2985.3	0	48	FEMALE	Stage III	unknow	unknow	unknow	GSE17536
GSM437186	613.2	1	63	MALE	Stage III	unknow	unknow	unknow	GSE17536
GSM437187	2298	1	58	MALE	Stage III	unknow	unknow	unknow	GSE17536
GSM437188	300.6	1	75	MALE	Stage III	unknow	unknow	unknow	GSE17536
GSM437189	1243.5	1	63	MALE	Stage III	unknow	unknow	unknow	GSE17536
GSM437190	2887.8	0	46	MALE	Stage III	unknow	unknow	unknow	GSE17536
GSM437191	2568.3	0	71	FEMALE	Stage III	unknow	unknow	unknow	GSE17536
GSM437192	2366.1	0	63	MALE	Stage III	unknow	unknow	unknow	GSE17536
GSM437193	667.5	1	87	FEMALE	Stage III	unknow	unknow	unknow	GSE17536
GSM437194	2235.9	0	63	MALE	Stage III	unknow	unknow	unknow	GSE17536
GSM437195	1772.1	1	87	MALE	Stage III	unknow	unknow	unknow	GSE17536
GSM437196	1434	1	30	MALE	Stage III	unknow	unknow	unknow	GSE17536
GSM437197	170.4	1	83	FEMALE	Stage III	unknow	unknow	unknow	GSE17536
GSM437198	2381.7	0	55	MALE	Stage III	unknow	unknow	unknow	GSE17536
GSM437199	2222.1	0	66	MALE	Stage III	unknow	unknow	unknow	GSE17536
GSM437200	1522.8	1	69	MALE	Stage III	unknow	unknow	unknow	GSE17536
GSM437201	2034.6	1	64	FEMALE	Stage III	unknow	unknow	unknow	GSE17536
GSM437202	2125.2	0	62	MALE	Stage III	unknow	unknow	unknow	GSE17536
GSM437203	1517.7	0	67	FEMALE	Stage III	unknow	unknow	unknow	GSE17536
GSM437204	1037.4	1	57	MALE	Stage III	unknow	unknow	unknow	GSE17536
GSM437205	1161.6	1	73	FEMALE	Stage III	unknow	unknow	unknow	GSE17536
GSM437206	1647	1	83	FEMALE	Stage III	unknow	unknow	unknow	GSE17536
GSM437207	2037.6	0	65	FEMALE	Stage III	unknow	unknow	unknow	GSE17536
GSM437208	1753.5	0	63	FEMALE	Stage III	unknow	unknow	unknow	GSE17536
GSM437209	1780.2	0	69	MALE	Stage III	unknow	unknow	unknow	GSE17536
GSM437210	1636.2	0	71	FEMALE	Stage III	unknow	unknow	unknow	GSE17536
GSM437211	570.9	1	51	FEMALE	Stage III	unknow	unknow	unknow	GSE17536
GSM437212	787.8	1	78	FEMALE	Stage III	unknow	unknow	unknow	GSE17536
GSM437213	1585.8	0	72	MALE	Stage III	unknow	unknow	unknow	GSE17536
GSM437214	961.5	1	46	MALE	Stage III	unknow	unknow	unknow	GSE17536
GSM437215	1678.5	0	67	MALE	Stage III	unknow	unknow	unknow	GSE17536
GSM437216	1700.1	0	67	MALE	Stage III	unknow	unknow	unknow	GSE17536
GSM437217	1512.9	0	26	MALE	Stage III	unknow	unknow	unknow	GSE17536
GSM437218	127.2	1	78	FEMALE	Stage III	unknow	unknow	unknow	GSE17536
GSM437219	1473.3	0	71	FEMALE	Stage III	unknow	unknow	unknow	GSE17536
GSM437220	1487.1	0	60	FEMALE	Stage III	unknow	unknow	unknow	GSE17536
GSM437221	1514.7	0	46	MALE	Stage III	unknow	unknow	unknow	GSE17536
GSM437222	1891.5	0	41	MALE	Stage III	unknow	unknow	unknow	GSE17536
GSM437223	1477.2	1	75	FEMALE	Stage III	unknow	unknow	unknow	GSE17536
GSM437224	27.6	0	54	MALE	Stage III	unknow	unknow	unknow	GSE17536
GSM437225	940.8	0	78	FEMALE	Stage III	unknow	unknow	unknow	GSE17536
GSM437226	1209	0	61	FEMALE	Stage III	unknow	unknow	unknow	GSE17536
GSM437227	3499.2	0	74	MALE	Stage III	unknow	unknow	unknow	GSE17536
GSM437228	957.6	0	79	FEMALE	Stage III	unknow	unknow	unknow	GSE17536
GSM437229	599.4	0	81	FEMALE	Stage III	unknow	unknow	unknow	GSE17536
GSM437230	738.6	0	62	FEMALE	Stage III	unknow	unknow	unknow	GSE17536
GSM437231	556.2	1	64	MALE	Stage IV	unknow	unknow	unknow	GSE17536
GSM437232	3922.5	0	72	FEMALE	Stage IV	unknow	unknow	unknow	GSE17536
GSM437233	528.6	1	59	FEMALE	Stage IV	unknow	unknow	unknow	GSE17536
GSM437234	159.6	1	46	MALE	Stage IV	unknow	unknow	unknow	GSE17536
GSM437235	70.8	1	69	MALE	Stage IV	unknow	unknow	unknow	GSE17536
GSM437236	171.6	1	73	MALE	Stage IV	unknow	unknow	unknow	GSE17536
GSM437237	458.4	1	66	MALE	Stage IV	unknow	unknow	unknow	GSE17536
GSM437238	2852.1	0	54	MALE	Stage IV	unknow	unknow	unknow	GSE17536
GSM437239	148.8	1	88	MALE	Stage IV	unknow	unknow	unknow	GSE17536
GSM437240	866.7	1	58	MALE	Stage IV	unknow	unknow	unknow	GSE17536
GSM437241	97.5	1	82	FEMALE	Stage IV	unknow	unknow	unknow	GSE17536
GSM437242	27.6	1	58	FEMALE	Stage IV	unknow	unknow	unknow	GSE17536
GSM437243	563.1	1	69	MALE	Stage IV	unknow	unknow	unknow	GSE17536
GSM437244	1731.9	1	51	MALE	Stage IV	unknow	unknow	unknow	GSE17536
GSM437245	431.7	1	70	FEMALE	Stage IV	unknow	unknow	unknow	GSE17536
GSM437246	153.6	1	82	FEMALE	Stage IV	unknow	unknow	unknow	GSE17536
GSM437247	149.7	1	60	MALE	Stage IV	unknow	unknow	unknow	GSE17536
GSM437248	995.1	1	52	MALE	Stage IV	unknow	unknow	unknow	GSE17536
GSM437249	1515.9	1	59	MALE	Stage IV	unknow	unknow	unknow	GSE17536
GSM437250	171.6	1	56	MALE	Stage IV	unknow	unknow	unknow	GSE17536
GSM437251	240.6	1	63	MALE	Stage IV	unknow	unknow	unknow	GSE17536
GSM437252	1020.6	1	65	FEMALE	Stage IV	unknow	unknow	unknow	GSE17536
GSM437253	43.2	1	54	MALE	Stage IV	unknow	unknow	unknow	GSE17536
GSM437254	1108.5	1	76	MALE	Stage IV	unknow	unknow	unknow	GSE17536
GSM437255	1822.5	0	58	FEMALE	Stage IV	unknow	unknow	unknow	GSE17536
GSM437256	1123.2	1	69	FEMALE	Stage IV	unknow	unknow	unknow	GSE17536
GSM437257	692.1	1	42	FEMALE	Stage IV	unknow	unknow	unknow	GSE17536
GSM437258	595.5	1	78	FEMALE	Stage IV	unknow	unknow	unknow	GSE17536
GSM437259	955.5	0	51	MALE	Stage IV	unknow	unknow	unknow	GSE17536
GSM437260	258.3	1	63	MALE	Stage IV	unknow	unknow	unknow	GSE17536
GSM437261	1268.1	0	66	MALE	Stage IV	unknow	unknow	unknow	GSE17536
GSM437262	457.5	1	73	MALE	Stage IV	unknow	unknow	unknow	GSE17536
GSM437263	436.8	1	62	MALE	Stage IV	unknow	unknow	unknow	GSE17536
GSM437264	298.8	1	82	FEMALE	Stage IV	unknow	unknow	unknow	GSE17536
GSM437265	268.2	1	76	MALE	Stage IV	unknow	unknow	unknow	GSE17536
GSM437266	980.1	0	78	FEMALE	Stage IV	unknow	unknow	unknow	GSE17536
GSM437267	62.1	1	66	FEMALE	Stage IV	unknow	unknow	unknow	GSE17536
GSM437268	683.4	1	68	MALE	Stage IV	unknow	unknow	unknow	GSE17536
GSM437269	670.5	0	47	MALE	Stage IV	unknow	unknow	unknow	GSE17536
TCGA-F4-6808	1024	0	54	FEMALE	Stage I	T1	M0	N0	TCGA-COAD
TCGA-AZ-4313	2310	0	51	FEMALE	Stage I	T1	M0	N0	TCGA-COAD
TCGA-AA-3875	549	0	78	FEMALE	Stage I	T1	M0	N0	TCGA-COAD
TCGA-CM-6163	427	0	74	MALE	Stage I	T1	M0	N0	TCGA-COAD
TCGA-AA-A00W	456	0	80	MALE	Stage I	T1	M0	N0	TCGA-COAD
TCGA-CK-5916	643	1	71	FEMALE	Stage I	T1	M0	N0	TCGA-COAD
TCGA-AZ-5407	2683	0	51	FEMALE	Stage I	T1	M0	N0	TCGA-COAD
TCGA-AA-3495	1127	0	79	MALE	Stage I	T2	M0	N0	TCGA-COAD
TCGA-AA-3968	669	0	55	FEMALE	Stage I	T2	M0	N0	TCGA-COAD
TCGA-AA-A03J	1246	0	65	FEMALE	Stage I	T2	M0	N0	TCGA-COAD
TCGA-AA-3530	580	0	80	MALE	Stage I	T2	M0	N0	TCGA-COAD
TCGA-A6-5656	1001	0	74	MALE	Stage I	T2	M0	N0	TCGA-COAD
TCGA-AY-A54L	525	0	74	FEMALE	Stage I	T2	M0	N0	TCGA-COAD
TCGA-A6-6138	685	0	61	MALE	Stage I	T2	M0	N0	TCGA-COAD
TCGA-CM-4744	609	0	69	MALE	Stage I	T2	M0	N0	TCGA-COAD
TCGA-AA-3549	639	0	69	MALE	Stage I	T2	M0	N0	TCGA-COAD
TCGA-CM-4746	1126	0	61	MALE	Stage I	T2	M0	N0	TCGA-COAD
TCGA-AD-6548	650	0	81	FEMALE	Stage I	T2	M0	N0	TCGA-COAD
TCGA-A6-2684	1127	0	75	FEMALE	Stage I	T2	M0	N0	TCGA-COAD
TCGA-AA-A00R	30	0	64	FEMALE	Stage I	T2	M0	N0	TCGA-COAD
TCGA-CM-6170	457	0	73	FEMALE	Stage I	T2	M0	N0	TCGA-COAD
TCGA-QG-A5Z2	952	0	61	MALE	Stage I	T2	M0	N0	TCGA-COAD
TCGA-AA-A00D	578	0	70	MALE	Stage I	T2	M0	N0	TCGA-COAD
TCGA-AA-3514	31	0	81	FEMALE	Stage I	T2	M0	N0	TCGA-COAD
TCGA-AA-3850	0	1	74	MALE	Stage I	T2	M0	N0	TCGA-COAD
TCGA-CM-6161	457	0	36	FEMALE	Stage I	T2	M0	N0	TCGA-COAD
TCGA-CM-6676	337	0	82	MALE	Stage I	T2	M0	N0	TCGA-COAD
TCGA-AA-3558	638	0	70	MALE	Stage I	T2	M0	N0	TCGA-COAD
TCGA-CM-6171	427	0	77	FEMALE	Stage I	T2	M0	N0	TCGA-COAD
TCGA-3L-AA1B	475	0	61	FEMALE	Stage I	T2	M0	N0	TCGA-COAD
TCGA-F4-6569	1087	0	60	MALE	Stage I	T2	M0	N0	TCGA-COAD
TCGA-AA-A02W	1247	0	73	FEMALE	Stage I	T2	M0	N0	TCGA-COAD
TCGA-A6-5659	926	0	82	MALE	Stage I	T2	M0	N0	TCGA-COAD
TCGA-AA-A01V	31	0	59	MALE	Stage I	T2	M0	N0	TCGA-COAD
TCGA-AY-A71X	588	0	54	FEMALE	Stage I	T2	M0	N0	TCGA-COAD
TCGA-AA-3858	945	0	67	MALE	Stage I	T2	M0	N0	TCGA-COAD
TCGA-AA-3544	426	0	68	MALE	Stage I	T2	M0	N0	TCGA-COAD
TCGA-AA-3667	426	0	36	FEMALE	Stage I	T2	M0	N0	TCGA-COAD
TCGA-D5-6530	621	0	53	MALE	Stage I	T2	M0	N0	TCGA-COAD
TCGA-F4-6806	1260	0	59	FEMALE	Stage I	T2	M0	N0	TCGA-COAD
TCGA-AU-6004	824	0	69	FEMALE	Stage I	T2	M0	N0	TCGA-COAD
TCGA-AA-3975	1036	0	80	MALE	Stage I	T2	M0	N0	TCGA-COAD
TCGA-AA-3855	975	0	72	MALE	Stage I	T2	M0	N0	TCGA-COAD
TCGA-AA-3526	580	0	57	MALE	Stage I	T2	M0	N0	TCGA-COAD
TCGA-CM-5864	457	0	60	MALE	Stage I	T2	M0	N0	TCGA-COAD
TCGA-AA-3866	518	0	78	FEMALE	Stage I	T2	M0	N0	TCGA-COAD
TCGA-CM-6166	669	0	48	FEMALE	Stage I	T2	M0	N0	TCGA-COAD
TCGA-D5-6898	229	0	51	FEMALE	Stage I	T2	M0	N0	TCGA-COAD
TCGA-D5-6923	378	0	57	MALE	Stage I	T2	M0	N0	TCGA-COAD
TCGA-AA-3538	791	0	54	FEMALE	Stage I	T2	M0	N0	TCGA-COAD
TCGA-AA-3502	1065	0	73	MALE	Stage I	T2	M0	N0	TCGA-COAD
TCGA-G4-6628	2424	0	78	MALE	Stage I	T2	M0	N0	TCGA-COAD
TCGA-A6-6653	742	0	82	MALE	Stage I	T2	M0	N0	TCGA-COAD
TCGA-AA-A01I	943	0	76	MALE	Stage I	T2	M0	N0	TCGA-COAD
TCGA-AA-A02Y	1216	0	73	MALE	Stage I	T2	M0	N0	TCGA-COAD
TCGA-AA-3553	730	0	61	FEMALE	Stage I	T2	M0	N0	TCGA-COAD
TCGA-AA-3980	242	0	89	FEMALE	Stage I	T2	M0	N0	TCGA-COAD
TCGA-AA-3506	1765	0	77	MALE	Stage I	T2	M0	N0	TCGA-COAD
TCGA-AA-3986	580	0	73	MALE	Stage I	T2	M0	N0	TCGA-COAD
TCGA-G4-6306	1359	0	71	MALE	unknow	T2	M0	N0	TCGA-COAD
TCGA-AA-A02O	28	0	82	MALE	Stage II	T3	M0	N0	TCGA-COAD
TCGA-AA-3697	2587	0	77	MALE	Stage II	T3	M0	N0	TCGA-COAD
TCGA-AA-A01Z	1126	0	68	MALE	Stage II	T3	M0	N0	TCGA-COAD
TCGA-AA-3663	212	0	42	MALE	Stage II	T3	M0	N0	TCGA-COAD
TCGA-AA-3685	1127	0	69	MALE	Stage II	T3	M0	N0	TCGA-COAD
TCGA-AA-A01Q	31	0	48	FEMALE	Stage II	T3	M0	N0	TCGA-COAD
TCGA-AA-3510	1946	0	70	MALE	Stage II	T3	M0	N0	TCGA-COAD
TCGA-AA-3864	1612	0	71	MALE	Stage II	T3	M0	N0	TCGA-COAD
TCGA-AA-3521		0	87	MALE	Stage II	T3	M0	N0	TCGA-COAD
TCGA-AA-3673	1522	0	53	FEMALE	Stage II	T3	M0	N0	TCGA-COAD
TCGA-AA-3660	2375	0	51	FEMALE	Stage II	T3	M0	N0	TCGA-COAD
TCGA-AA-3489	214	1	75	MALE	Stage II	T3	M0	N0	TCGA-COAD
TCGA-AA-3675	1431	0	84	MALE	Stage II	T3	M0	N0	TCGA-COAD
TCGA-AA-3492	1	1	90	FEMALE	Stage II	T3	M0	N0	TCGA-COAD
TCGA-AA-3509	1915	0	54	FEMALE	Stage II	T3	M0	N0	TCGA-COAD
TCGA-AA-3664	1643	0	74	FEMALE	Stage II	T3	M0	N0	TCGA-COAD
TCGA-AZ-6601	3042	1	68	MALE	Stage II	T3	M0	N0	TCGA-COAD
TCGA-AA-3524	1096	0	85	MALE	Stage II	T3	M0	N0	TCGA-COAD
TCGA-AA-3655	1856	0	68	MALE	Stage II	T3	M0	N0	TCGA-COAD
TCGA-AA-3520	731	0	86	FEMALE	Stage II	T3	M0	N0	TCGA-COAD
TCGA-G4-6295	254	0	70	FEMALE	Stage II	T3	M0	N0	TCGA-COAD
TCGA-AA-A029	1581	0	67	MALE	Stage II	T3	M0	N0	TCGA-COAD
TCGA-A6-2680	1068	0	72	FEMALE	Stage II	T3	M0	N0	TCGA-COAD
TCGA-AA-3496	31	0	83	FEMALE	Stage II	T3	M0	N0	TCGA-COAD
TCGA-AA-3518	31	0	81	FEMALE	Stage II	T3	M0	N0	TCGA-COAD
TCGA-D5-6924	435	0	68	MALE	Stage II	T3	M0	N0	TCGA-COAD
TCGA-A6-2670	775	0	45	MALE	Stage II	T3	M0	N0	TCGA-COAD
TCGA-AA-A00K	549	0	79	MALE	Stage II	T3	M0	N0	TCGA-COAD
TCGA-D5-6920	377	0	77	FEMALE	Stage II	T3	M0	N0	TCGA-COAD
TCGA-AA-3814	0	0	85	FEMALE	Stage II	T3	M0	N0	TCGA-COAD
TCGA-AA-3710	821	0	80	FEMALE	Stage II	T3	M0	N0	TCGA-COAD
TCGA-AA-3819	761	0	41	FEMALE	Stage II	T3	M0	N0	TCGA-COAD
TCGA-CA-5254	386	0	42	FEMALE	Stage II	T3	M0	N0	TCGA-COAD
TCGA-CM-6169	396	0	67	MALE	Stage II	T3	M0	N0	TCGA-COAD
TCGA-AA-A00E	913	0	65	MALE	Stage II	T3	M0	N0	TCGA-COAD
TCGA-AA-3862	914	0	82	MALE	Stage II	T3	M0	N0	TCGA-COAD
TCGA-A6-3808	1014	0	73	MALE	Stage II	T3	M0	N0	TCGA-COAD
TCGA-D5-6531	540	0	75	MALE	Stage II	T3	M0	N0	TCGA-COAD
TCGA-D5-6532	555	0	61	MALE	Stage II	T3	M0	N0	TCGA-COAD
TCGA-AA-3554	546	0	62	FEMALE	Stage II	T3	M0	N0	TCGA-COAD
TCGA-CM-6674	394	0	39	MALE	Stage II	T3	M0	N0	TCGA-COAD
TCGA-A6-3810	1111	0	62	MALE	Stage II	T3	M0	N0	TCGA-COAD
TCGA-D5-6529	614	0	69	MALE	Stage II	T3	M0	N0	TCGA-COAD
TCGA-AA-3846	518	0	74	FEMALE	Stage II	T3	M0	N0	TCGA-COAD
TCGA-AA-3970	1096	0	65	MALE	Stage II	T3	M0	N0	TCGA-COAD
TCGA-AA-3861	914	0	72	MALE	Stage II	T3	M0	N0	TCGA-COAD
TCGA-CM-6679	306	0	58	MALE	Stage II	T3	M0	N0	TCGA-COAD
TCGA-CM-6165	488	0	74	MALE	Stage II	T3	M0	N0	TCGA-COAD
TCGA-AA-3939	395	0	83	MALE	Stage II	T3	M0	N0	TCGA-COAD
TCGA-T9-A92H	362	0	82	MALE	Stage II	T3	M0	N0	TCGA-COAD
TCGA-A6-6141	255	0	31	MALE	Stage II	T3	M0	N0	TCGA-COAD
TCGA-G4-6626	1	1	90	MALE	Stage II	T3	M0	N0	TCGA-COAD
TCGA-AA-A004	424	0	76	MALE	Stage II	T3	M0	N0	TCGA-COAD
TCGA-5M-AATE	1200	0	76	MALE	Stage II	T3	M0	N0	TCGA-COAD
TCGA-AU-3779	441	0	80	FEMALE	Stage II	T3	M0	N0	TCGA-COAD
TCGA-AY-A69D	543	0	55	FEMALE	Stage II	T3	M0	N0	TCGA-COAD
TCGA-AA-3956	1035	0	65	MALE	Stage II	T3	M0	N0	TCGA-COAD
TCGA-AA-3984	0	0	61	FEMALE	Stage II	T3	M0	N0	TCGA-COAD
TCGA-A6-2685	1133	0	48	FEMALE	Stage II	T3	M0	N0	TCGA-COAD
TCGA-AA-3517	1186	0	60	MALE	Stage II	T3	M0	N0	TCGA-COAD
TCGA-A6-6140	734	0	62	MALE	Stage II	T3	M0	N0	TCGA-COAD
TCGA-AA-3812	1066	0	82	FEMALE	Stage II	T3	M0	N0	TCGA-COAD
TCGA-AA-3522	1127	0	67	MALE	Stage II	T3	M0	N0	TCGA-COAD
TCGA-CM-5349	915	0	68	FEMALE	Stage II	T3	M0	N0	TCGA-COAD
TCGA-CM-6164	883	0	46	FEMALE	Stage II	T3	M0	N0	TCGA-COAD
TCGA-AA-3534	882	0	78	FEMALE	Stage II	T3	M0	N0	TCGA-COAD
TCGA-AA-A00L	1157	0	66	MALE	Stage II	T3	M0	N0	TCGA-COAD
TCGA-G4-6625	2792	0	77	FEMALE	Stage II	T3	M0	N0	TCGA-COAD
TCGA-D5-6536	543	0	73	MALE	Stage II	T3	M0	N0	TCGA-COAD
TCGA-G4-6586	1089	0	73	FEMALE	Stage II	T3	M0	N0	TCGA-COAD
TCGA-CA-6719	435	0	77	MALE	Stage II	T3	M0	N0	TCGA-COAD
TCGA-F4-6570	188	1	78	FEMALE	Stage II	T3	M0	N0	TCGA-COAD
TCGA-DM-A0XD	743	1	65	MALE	Stage II	T3	M0	N0	TCGA-COAD
TCGA-CM-6168	395	0	84	FEMALE	Stage II	T3	M0	N0	TCGA-COAD
TCGA-AZ-4681	3247	0	79	FEMALE	Stage II	T3	M0	N0	TCGA-COAD
TCGA-D5-6927	287	0	34	MALE	Stage II	T3	M0	N0	TCGA-COAD
TCGA-DM-A28G	1849	1	75	MALE	Stage II	T3	M0	N0	TCGA-COAD
TCGA-AA-3833	485	0	63	FEMALE	Stage II	T3	M0	N0	TCGA-COAD
TCGA-D5-6541	474	0	49	MALE	Stage II	T3	M0	N0	TCGA-COAD
TCGA-DM-A1DB	1348	1	68	MALE	Stage II	T3	M0	N0	TCGA-COAD
TCGA-AM-5821	28	0	68	FEMALE	Stage II	T3	M0	N0	TCGA-COAD
TCGA-CA-6718	306	1	46	MALE	Stage II	T3	M0	N0	TCGA-COAD
TCGA-AA-3856	30	0	59	MALE	Stage II	T3	M0	N0	TCGA-COAD
TCGA-AA-A00Z	669	0	70	MALE	Stage II	T3	M0	N0	TCGA-COAD
TCGA-AZ-4315	1776	0	61	MALE	Stage II	T3	M0	N0	TCGA-COAD
TCGA-AA-3532	882	0	63	MALE	Stage II	T3	M0	N0	TCGA-COAD
TCGA-AA-3561	424	0	72	MALE	Stage II	T3	M0	N0	TCGA-COAD
TCGA-A6-2686	1126	1	81	FEMALE	Stage II	T3	M0	N0	TCGA-COAD
TCGA-AA-3815	1005	0	65	FEMALE	Stage II	T3	M0	N0	TCGA-COAD
TCGA-CA-6716	371	0	65	MALE	Stage II	T3	M0	N0	TCGA-COAD
TCGA-F4-6703	1456	0	64	MALE	Stage II	T3	M0	N0	TCGA-COAD
TCGA-CA-5797	383	0	56	MALE	Stage II	T3	M0	N0	TCGA-COAD
TCGA-DM-A28M	2895	0	63	MALE	Stage II	T3	M0	N0	TCGA-COAD
TCGA-AA-3818	30	1	78	FEMALE	Stage II	T3	M0	N0	TCGA-COAD
TCGA-DM-A1D0	3974	0	79	FEMALE	Stage II	T3	M0	N0	TCGA-COAD
TCGA-A6-5665	671	0	84	FEMALE	Stage II	T3	M0	N0	TCGA-COAD
TCGA-CA-5255	376	0	45	MALE	Stage II	T3	M0	N0	TCGA-COAD
TCGA-D5-5540	1706	0	73	MALE	Stage II	T3	M0	N0	TCGA-COAD
TCGA-CM-4743	701	0	69	MALE	Stage II	T3	M0	N0	TCGA-COAD
TCGA-DM-A1D9	4270	0	67	FEMALE	Stage II	T3	M0	N0	TCGA-COAD
TCGA-A6-4105	442	1	79	MALE	Stage II	T3	M0	N0	TCGA-COAD
TCGA-AA-A02R	670	1	84	FEMALE	Stage II	T3	M0	N0	TCGA-COAD
TCGA-CM-4752	396	0	58	MALE	Stage II	T3	M0	N0	TCGA-COAD
TCGA-G4-6588	796	0	58	FEMALE	Stage II	T3	M0	N0	TCGA-COAD
TCGA-CA-5256	379	0	54	FEMALE	Stage II	T3	M0	N0	TCGA-COAD
TCGA-D5-6932	346	0	69	MALE	Stage II	T3	M0	N0	TCGA-COAD
TCGA-AA-3841	1124	0	66	MALE	Stage II	T3	M0	N0	TCGA-COAD
TCGA-CM-5860	974	0	44	MALE	Stage II	T3	M0	N0	TCGA-COAD
TCGA-F4-6854	16	0	77	FEMALE	Stage II	T3	M0	N0	TCGA-COAD
TCGA-AA-A00A	1157	0	80	MALE	Stage II	T3	M0	N0	TCGA-COAD
TCGA-CM-5861	457	0	63	FEMALE	Stage II	T3	M0	N0	TCGA-COAD
TCGA-A6-6650	627	0	69	FEMALE	Stage II	T3	M0	N0	TCGA-COAD
TCGA-AA-3979	730	0	84	MALE	Stage II	T3	M0	N0	TCGA-COAD
TCGA-AA-A017	457	0	57	FEMALE	Stage II	T3	M0	N0	TCGA-COAD
TCGA-CM-6677	337	0	75	FEMALE	Stage II	T3	M0	N0	TCGA-COAD
TCGA-DM-A0X9	3641	0	71	FEMALE	Stage II	T3	M0	N0	TCGA-COAD
TCGA-F4-6855	1442	0	70	FEMALE	Stage II	T3	M0	N0	TCGA-COAD
TCGA-A6-5661	1020	0	80	FEMALE	Stage II	T3	M0	N0	TCGA-COAD
TCGA-DM-A1D4	2821	1	80	MALE	Stage II	T3	M0	N0	TCGA-COAD
TCGA-DM-A28E	3648	0	72	FEMALE	Stage II	T3	M0	N0	TCGA-COAD
TCGA-AA-3845	0	1	86	FEMALE	Stage II	T3	M0	N0	TCGA-COAD
TCGA-AA-3851	1006	0	74	MALE	Stage II	T3	M0	N0	TCGA-COAD
TCGA-AA-3527	0	0	90	FEMALE	Stage II	T3	M0	N0	TCGA-COAD
TCGA-AD-6889	2532	1	76	MALE	Stage II	T3	M0	N0	TCGA-COAD
TCGA-AA-3531	1035	0	75	FEMALE	Stage II	T3	M0	N0	TCGA-COAD
TCGA-AA-3831	547	0	66	MALE	Stage II	T3	M0	N0	TCGA-COAD
TCGA-F4-6805	1047	0	58	FEMALE	Stage II	T3	M0	N0	TCGA-COAD
TCGA-A6-2681	1387	0	73	FEMALE	Stage II	T3	M0	N0	TCGA-COAD
TCGA-G4-6627	2175	0	84	MALE	Stage II	T3	M0	N0	TCGA-COAD
TCGA-DM-A28C	2475	1	74	MALE	Stage II	T3	M0	N0	TCGA-COAD
TCGA-D5-6539	380	0	45	FEMALE	unknow	T3	M0	N0	TCGA-COAD
TCGA-AA-3511	212	0	64	MALE	Stage II	T4	M0	N0	TCGA-COAD
TCGA-AA-A022	0	0	88	FEMALE	Stage II	T4	M0	N0	TCGA-COAD
TCGA-G4-6304	1631	0	66	FEMALE	Stage II	T4	M0	N0	TCGA-COAD
TCGA-AA-A010	1064	0	46	FEMALE	Stage II	T4	M0	N0	TCGA-COAD
TCGA-A6-2676	1305	1	75	FEMALE	Stage II	T4	M0	N0	TCGA-COAD
TCGA-SS-A7HO	1829	0	44	FEMALE	Stage II	T4	M0	N0	TCGA-COAD
TCGA-A6-5666	995	0	78	MALE	Stage II	T4	M0	N0	TCGA-COAD
TCGA-D5-6533	775	0	68	FEMALE	unknow	T4	M0	N0	TCGA-COAD
TCGA-AA-A02J	153	1	70	FEMALE	Stage IV	T3	M1	N0	TCGA-COAD
TCGA-AA-3494	31	0	55	MALE	Stage IV	T3	M1	N0	TCGA-COAD
TCGA-AA-3713	579	0	68	MALE	Stage IV	T3	M1	N0	TCGA-COAD
TCGA-A6-6652	751	0	59	MALE	Stage IV	T3	M1	N0	TCGA-COAD
TCGA-A6-2683	504	1	57	FEMALE	Stage IV	T4	M1	N0	TCGA-COAD
TCGA-A6-6648	766	0	56	MALE	Stage IV	T3	M1	N0	TCGA-COAD
TCGA-5M-AAT4	49	1	74	MALE	Stage IV	T3	M1	N0	TCGA-COAD
TCGA-AD-6890	746	0	65	MALE	unknow	T1	unknow	N0	TCGA-COAD
TCGA-CK-5912	1493	1	81	MALE	Stage I	T2	unknow	N0	TCGA-COAD
TCGA-QL-A97D	666	0	84	FEMALE	Stage I	T2	unknow	N0	TCGA-COAD
TCGA-AZ-6599	206	1	72	MALE	Stage I	T2	unknow	N0	TCGA-COAD
TCGA-CK-5915	0	0	63	MALE	Stage I	T2	unknow	N0	TCGA-COAD
TCGA-AD-A5EK	500	0	51	MALE	Stage I	T2	unknow	N0	TCGA-COAD
TCGA-AZ-5403	1910	1	43	MALE	Stage II	T3	unknow	N0	TCGA-COAD
TCGA-AZ-6598	1503	1	77	FEMALE	Stage II	T3	unknow	N0	TCGA-COAD
TCGA-QG-A5YX	1003	0	61	FEMALE	Stage II	T3	unknow	N0	TCGA-COAD
TCGA-A6-2675	1321	0	78	MALE	Stage II	T3	unknow	N0	TCGA-COAD
TCGA-CK-6747	820	0	87	FEMALE	Stage II	T3	unknow	N0	TCGA-COAD
TCGA-NH-A5IV	0	0	90	FEMALE	Stage II	T3	unknow	N0	TCGA-COAD
TCGA-CK-5913	1561	0	58	FEMALE	Stage II	T3	unknow	N0	TCGA-COAD
TCGA-NH-A8F7	543	0	53	FEMALE	Stage II	T3	unknow	N0	TCGA-COAD
TCGA-NH-A50T	553	0	68	FEMALE	Stage II	T3	unknow	N0	TCGA-COAD
TCGA-AD-A5EJ	0	0	74	FEMALE	Stage II	T3	unknow	N0	TCGA-COAD
TCGA-AD-6963	834	0	58	MALE	unknow	T3	unknow	N0	TCGA-COAD
TCGA-AD-6901	682	1	78	MALE	unknow	T3	unknow	N0	TCGA-COAD
TCGA-A6-6782	617	0	82	MALE	Stage II	T4	unknow	N0	TCGA-COAD
TCGA-CK-6746	0	0	84	FEMALE	Stage II	T4	unknow	N0	TCGA-COAD
TCGA-G4-6323	419	0	50	MALE	Stage I	unknow	unknow	N0	TCGA-COAD
TCGA-AY-4071	29	1	63	FEMALE	Stage I	T1	unknow	N0	TCGA-COAD
TCGA-AA-3977	761	0	65	MALE	unknow	T2	unknow	N0	TCGA-COAD
TCGA-AY-6197	652	0	60	MALE	Stage II	T3	unknow	N0	TCGA-COAD
TCGA-A6-2679	1366	0	73	FEMALE	Stage II	T3	unknow	N0	TCGA-COAD
TCGA-AA-A01X	791	0	80	FEMALE	Stage III	T2	M0	N1	TCGA-COAD
TCGA-AA-3678	1430	0	60	FEMALE	Stage III	T2	M0	N1	TCGA-COAD
TCGA-AA-A01C	457	0	75	MALE	Stage III	T2	M0	N1	TCGA-COAD
TCGA-AA-3842	1126	0	51	MALE	Stage III	T2	M0	N1	TCGA-COAD
TCGA-AZ-6608	59	1	55	FEMALE	Stage III	T2	M0	N1	TCGA-COAD
TCGA-AA-3519	276	0	63	MALE	Stage III	T3	M0	N1	TCGA-COAD
TCGA-AA-A01S	31	0	47	FEMALE	Stage III	T3	M0	N1	TCGA-COAD
TCGA-AA-A01P	1158	1	80	FEMALE	Stage III	T3	M0	N1	TCGA-COAD
TCGA-AA-A01T	1005	0	63	FEMALE	Stage III	T3	M0	N1	TCGA-COAD
TCGA-AA-3681	182	0	77	FEMALE	Stage III	T3	M0	N1	TCGA-COAD
TCGA-AA-3672	0	0	90	FEMALE	Stage III	T3	M0	N1	TCGA-COAD
TCGA-AA-3971	489	0	58	MALE	Stage III	T3	M0	N1	TCGA-COAD
TCGA-G4-6293	4051	0	49	FEMALE	Stage III	T3	M0	N1	TCGA-COAD
TCGA-AA-3666	61	1	68	MALE	Stage III	T3	M0	N1	TCGA-COAD
TCGA-CK-4948	4502	0	45	FEMALE	Stage III	T3	M0	N1	TCGA-COAD
TCGA-D5-6922	308	0	76	MALE	Stage III	T3	M0	N1	TCGA-COAD
TCGA-CA-6715	383	0	63	MALE	Stage III	T3	M0	N1	TCGA-COAD
TCGA-A6-A56B	1711	1	57	MALE	Stage III	T3	M0	N1	TCGA-COAD
TCGA-AA-A00U	518	0	50	MALE	Stage III	T3	M0	N1	TCGA-COAD
TCGA-DM-A28F	1094	1	73	MALE	Stage III	T3	M0	N1	TCGA-COAD
TCGA-A6-2678	1286	0	43	FEMALE	Stage III	T3	M0	N1	TCGA-COAD
TCGA-A6-5657	962	0	65	MALE	Stage III	T3	M0	N1	TCGA-COAD
TCGA-AA-3860	945	0	53	FEMALE	Stage III	T3	M0	N1	TCGA-COAD
TCGA-G4-6309	2600	0	40	FEMALE	Stage III	T3	M0	N1	TCGA-COAD
TCGA-A6-A5ZU	293	0	59	MALE	Stage III	T3	M0	N1	TCGA-COAD
TCGA-AA-3967	943	0	77	MALE	Stage III	T3	M0	N1	TCGA-COAD
TCGA-AA-A01F	974	0	72	MALE	Stage III	T3	M0	N1	TCGA-COAD
TCGA-G4-6307	1674	0	37	FEMALE	Stage III	T3	M0	N1	TCGA-COAD
TCGA-A6-6654	726	0	65	FEMALE	Stage III	T3	M0	N1	TCGA-COAD
TCGA-G4-6310	1935	0	69	MALE	Stage III	T3	M0	N1	TCGA-COAD
TCGA-F4-6460	972	1	51	FEMALE	Stage III	T3	M0	N1	TCGA-COAD
TCGA-AZ-4615	1002	0	84	MALE	Stage III	T3	M0	N1	TCGA-COAD
TCGA-AZ-4308	3324	0	47	FEMALE	Stage III	T3	M0	N1	TCGA-COAD
TCGA-AA-3982	822	0	75	MALE	Stage III	T3	M0	N1	TCGA-COAD
TCGA-A6-2672	1419	0	82	FEMALE	Stage III	T3	M0	N1	TCGA-COAD
TCGA-AA-3525	1	0	90	MALE	Stage III	T3	M0	N1	TCGA-COAD
TCGA-AZ-6605	159	1	77	MALE	Stage III	T4	M0	N1	TCGA-COAD
TCGA-AA-A00Q	1278	0	66	FEMALE	Stage III	T4	M0	N1	TCGA-COAD
TCGA-CK-4947	534	0	46	FEMALE	Stage III	T4	M0	N1	TCGA-COAD
TCGA-D5-6926	275	0	65	MALE	Stage III	T4	M0	N1	TCGA-COAD
TCGA-AA-A02E	90	1	82	FEMALE	Stage IV	T3	M1	N1	TCGA-COAD
TCGA-G4-6315	1883	0	66	MALE	Stage IV	T3	M1	N1	TCGA-COAD
TCGA-G4-6303	2003	1	54	FEMALE	Stage IV	T3	M1	N1	TCGA-COAD
TCGA-G4-6294	858	1	75	MALE	Stage IV	T3	M1	N1	TCGA-COAD
TCGA-AA-3972	1551	0	72	MALE	Stage IV	T3	M1	N1	TCGA-COAD
TCGA-AA-3696	153	1	75	FEMALE	Stage IV	T3	M1	N1	TCGA-COAD
TCGA-AA-3688	578	0	80	MALE	Stage IV	T3	M1	N1	TCGA-COAD
TCGA-D5-6929	408	0	49	FEMALE	Stage IV	T3	M1	N1	TCGA-COAD
TCGA-A6-A567	1881	1	56	MALE	Stage IV	T3	M1	N1	TCGA-COAD
TCGA-F4-6809	403	1	52	FEMALE	Stage IV	T3	M1	N1	TCGA-COAD
TCGA-AA-3973	397	0	69	MALE	Stage IV	T4	M1	N1	TCGA-COAD
TCGA-AZ-6600	368	1	64	MALE	Stage IV	T4	M1	N1	TCGA-COAD
TCGA-AA-3693	0	0	77	FEMALE	Stage IV	T4	M1	N1	TCGA-COAD
TCGA-AZ-4614	172	1	71	FEMALE	Stage IV	T4	M1	N1	TCGA-COAD
TCGA-A6-2682	424	1	70	MALE	Stage IV	T4	M1	N1	TCGA-COAD
TCGA-G4-6321	672	0	60	FEMALE	Stage III	T2	unknow	N1	TCGA-COAD
TCGA-AZ-6603	899	1	77	FEMALE	unknow	T2	unknow	N1	TCGA-COAD
TCGA-G4-6311	1199	0	80	MALE	Stage III	T3	unknow	N1	TCGA-COAD
TCGA-G4-6320	804	0	73	MALE	Stage III	T3	unknow	N1	TCGA-COAD
TCGA-D5-6535	460	0	80	FEMALE	Stage III	T3	unknow	N1	TCGA-COAD
TCGA-CK-5914	669	0	81	MALE	Stage III	T3	unknow	N1	TCGA-COAD
TCGA-G4-6298	0	1	90	MALE	Stage III	T4	unknow	N1	TCGA-COAD
TCGA-DM-A1D8	383	1	50	FEMALE	unknow	T3	unknow	N1	TCGA-COAD
TCGA-CM-5341	884	0	82	FEMALE	Stage III	T2	M0	N1	TCGA-COAD
TCGA-CM-6172	335	0	70	FEMALE	Stage III	T3	M0	N1	TCGA-COAD
TCGA-AD-6895	763	0	84	MALE	Stage III	T3	M0	N1	TCGA-COAD
TCGA-CM-5348	699	0	72	MALE	Stage III	T3	M0	N1	TCGA-COAD
TCGA-D5-5541	1701	0	63	MALE	Stage III	T3	M0	N1	TCGA-COAD
TCGA-AY-6386	542	0	66	FEMALE	Stage III	T3	M0	N1	TCGA-COAD
TCGA-AY-5543	1004	0	65	FEMALE	Stage IV	T3	M1	N1	TCGA-COAD
TCGA-CM-5862	153	1	80	MALE	Stage IV	T3	M1	N1	TCGA-COAD
TCGA-A6-6142	763	0	56	FEMALE	Stage IV	T3	M1	N1	TCGA-COAD
TCGA-CM-5868	518	0	59	FEMALE	Stage IV	T4	M1	N1	TCGA-COAD
TCGA-A6-5667	887	0	40	FEMALE	Stage III	T3	unknow	N1	TCGA-COAD
TCGA-D5-6537	146	1	64	MALE	Stage III	T3	unknow	N1	TCGA-COAD
TCGA-QG-A5YV	1301	0	64	FEMALE	Stage III	T4	unknow	N1	TCGA-COAD
TCGA-A6-6649	735	0	66	MALE	Stage III	T3	M0	N1	TCGA-COAD
TCGA-CM-4751	822	0	62	MALE	Stage III	T3	M0	N1	TCGA-COAD
TCGA-A6-4107	987	0	57	FEMALE	Stage III	T3	M0	N1	TCGA-COAD
TCGA-D5-5538	1661	1	60	FEMALE	Stage III	T3	M0	N1	TCGA-COAD
TCGA-AD-6888	472	1	73	MALE	Stage III	T3	M0	N1	TCGA-COAD
TCGA-CM-5344	670	0	39	FEMALE	Stage III	T3	M0	N1	TCGA-COAD
TCGA-4N-A93T	146	0	67	MALE	Stage III	T4	M0	N1	TCGA-COAD
TCGA-AA-3941	730	0	84	FEMALE	Stage IV	T4	M1	N1	TCGA-COAD
TCGA-CM-4747	761	0	47	MALE	Stage IV	T4	M1	N1	TCGA-COAD
TCGA-A6-6651	662	0	55	FEMALE	Stage III	T3	unknow	N1	TCGA-COAD
TCGA-A6-6137	824	0	55	MALE	Stage III	T3	M0	N1	TCGA-COAD
TCGA-CM-6678	335	0	63	FEMALE	Stage IV	T4	M1	N1	TCGA-COAD
TCGA-AA-3712	0	0	65	MALE	Stage III	T3	M0	N2	TCGA-COAD
TCGA-D5-6538	521	0	79	FEMALE	Stage III	T3	M0	N2	TCGA-COAD
TCGA-AA-3560	608	0	72	FEMALE	Stage III	T3	M0	N2	TCGA-COAD
TCGA-AA-3952	61	1	68	MALE	Stage III	T3	M0	N2	TCGA-COAD
TCGA-AA-3844	454	0	78	FEMALE	Stage III	T3	M0	N2	TCGA-COAD
TCGA-DM-A28H	3561	0	50	MALE	Stage III	T3	M0	N2	TCGA-COAD
TCGA-AA-3529	0	1	78	FEMALE	Stage III	T3	M0	N2	TCGA-COAD
TCGA-AA-A00F	1035	0	66	MALE	Stage III	T3	M0	N2	TCGA-COAD
TCGA-A6-2677	740	1	68	FEMALE	Stage III	T3	M0	N2	TCGA-COAD
TCGA-A6-3807	1054	0	53	FEMALE	Stage III	T3	M0	N2	TCGA-COAD
TCGA-AA-3552	396	1	85	MALE	Stage III	T3	M0	N2	TCGA-COAD
TCGA-AA-3548	1034	0	71	FEMALE	Stage III	T3	M0	N2	TCGA-COAD
TCGA-G4-6299	2268	0	69	MALE	Stage III	T3	M0	N2	TCGA-COAD
TCGA-DM-A1DA	228	1	71	FEMALE	Stage III	T3	M0	N2	TCGA-COAD
TCGA-AA-3848	306	1	82	FEMALE	Stage III	T3	M0	N2	TCGA-COAD
TCGA-AY-4070	496	1	50	FEMALE	Stage III	T3	M0	N2	TCGA-COAD
TCGA-AA-A00O	822	0	83	FEMALE	Stage III	T3	M0	N2	TCGA-COAD
TCGA-DM-A28A	805	1	78	MALE	Stage III	T3	M0	N2	TCGA-COAD
TCGA-AA-3562	608	0	82	MALE	Stage III	T3	M0	N2	TCGA-COAD
TCGA-AA-A01K	943	0	74	FEMALE	Stage III	T3	M0	N2	TCGA-COAD
TCGA-DM-A0XF	1162	1	68	FEMALE	Stage III	T3	M0	N2	TCGA-COAD
TCGA-AA-3542	395	0	69	MALE	Stage III	T3	M0	N2	TCGA-COAD
TCGA-DM-A1HA	2600	0	82	MALE	Stage III	T3	M0	N2	TCGA-COAD
TCGA-D5-6931	365	0	77	MALE	Stage III	T4	M0	N2	TCGA-COAD
TCGA-F4-6461	338	1	41	FEMALE	Stage III	T4	M0	N2	TCGA-COAD
TCGA-AA-A02H	61	1	74	FEMALE	Stage IV	T3	M1	N2	TCGA-COAD
TCGA-A6-2671	1331	1	85	MALE	Stage IV	T3	M1	N2	TCGA-COAD
TCGA-AA-3867	731	0	74	MALE	Stage IV	T3	M1	N2	TCGA-COAD
TCGA-AA-3989	242	1	84	MALE	Stage IV	T3	M1	N2	TCGA-COAD
TCGA-AZ-4616	156	1	82	FEMALE	Stage IV	T3	M1	N2	TCGA-COAD
TCGA-G4-6314	1093	0	76	FEMALE	Stage IV	T3	M1	N2	TCGA-COAD
TCGA-AA-3679	457	0	59	MALE	Stage IV	T3	M1	N2	TCGA-COAD
TCGA-AA-3870	912	0	71	FEMALE	Stage IV	T3	M1	N2	TCGA-COAD
TCGA-AA-3930	61	1	66	MALE	Stage IV	T3	M1	N2	TCGA-COAD
TCGA-G4-6297	2506	0	55	FEMALE	Stage IV	T3	M1	N2	TCGA-COAD
TCGA-AA-3695	0	0	63	FEMALE	Stage IV	T3	M1	N2	TCGA-COAD
TCGA-A6-5662	718	0	46	MALE	Stage IV	T3	M1	N2	TCGA-COAD
TCGA-AZ-6606	357	1	81	MALE	Stage IV	T4	M1	N2	TCGA-COAD
TCGA-AZ-6607	97	1	69	MALE	Stage IV	T4	M1	N2	TCGA-COAD
TCGA-AZ-4323	43	1	37	MALE	Stage IV	T4	M1	N2	TCGA-COAD
TCGA-AA-A02K	426	1	50	MALE	Stage IV	T4	M1	N2	TCGA-COAD
TCGA-AA-3680	335	1	67	FEMALE	Stage IV	T4	M1	N2	TCGA-COAD
TCGA-AA-3869	822	1	76	MALE	Stage IV	T4	M1	N2	TCGA-COAD
TCGA-AA-3662	184	0	80	FEMALE	Stage IV	T4	M1	N2	TCGA-COAD
TCGA-AA-3872	0	0	45	MALE	Stage IV	T4	M1	N2	TCGA-COAD
TCGA-AM-5820	14	0	59	FEMALE	Stage IV	T4	M1	N2	TCGA-COAD
TCGA-G4-6317	1095	0	51	FEMALE	Stage III	T3	unknow	N2	TCGA-COAD
TCGA-D5-5537	1381	1	83	MALE	unknow	T3	unknow	N2	TCGA-COAD
TCGA-AA-3955	638	0	38	MALE	Stage III	T2	M0	N2	TCGA-COAD
TCGA-F4-6459	262	1	61	FEMALE	Stage III	T3	M0	N2	TCGA-COAD
TCGA-NH-A50V	588	0	69	MALE	Stage III	T3	M0	N2	TCGA-COAD
TCGA-CM-6680	366	0	78	FEMALE	Stage III	T3	M0	N2	TCGA-COAD
TCGA-AY-A8YK	573	0	44	MALE	Stage IV	T3	M1	N2	TCGA-COAD
TCGA-RU-A8FL	1177	0	51	MALE	Stage III	T3	unknow	N2	TCGA-COAD
TCGA-NH-A6GA	302	1	58	MALE	Stage III	T4	unknow	N2	TCGA-COAD
TCGA-A6-5664	672	0	80	MALE	Stage III	T4	unknow	N2	TCGA-COAD
TCGA-CM-6167	456	0	57	FEMALE	Stage III	T3	M0	N2	TCGA-COAD
TCGA-A6-5660	888	0	73	MALE	Stage III	T3	M0	N2	TCGA-COAD
TCGA-F4-6807	1309	0	51	FEMALE	Stage III	T3	M0	N2	TCGA-COAD
TCGA-AD-6965	805	0	62	MALE	Stage III	T4	M0	N2	TCGA-COAD
TCGA-NH-A8F8	511	1	79	MALE	Stage IV	T4	M1	N2	TCGA-COAD
TCGA-5M-AAT6	290	1	40	FEMALE	Stage IV	T4	M1	N2	TCGA-COAD
TCGA-CM-6675	397	0	35	MALE	Stage IV	T3	M1	N2	TCGA-COAD
TCGA-NH-A6GB	476	0	71	FEMALE	Stage III	T3	unknow	N2	TCGA-COAD
TCGA-QG-A5YW	896	0	55	FEMALE	Stage III	T3	unknow	N2	TCGA-COAD
TCGA-AD-6964	331	1	58	MALE	unknow	T4	unknow	N2	TCGA-COAD

## Sheet: S2
Table S2: Summary of 67 recognized necroptosis-related genes
Gene	Type
FADD	necroptosis
FAS	necroptosis
FASLG	necroptosis
MLKL	necroptosis
RIPK1	necroptosis
RIPK3	necroptosis
TLR3	necroptosis
TNF	necroptosis
TSC1	necroptosis
TRIM11	necroptosis
CASP8	necroptosis
ZBP1	necroptosis
MAPK8	necroptosis
IPMK	necroptosis
ITPK1	necroptosis
SIRT3	necroptosis
MYC	necroptosis
TNFRSF1A	necroptosis
TNFSF10	necroptosis
TNFRSF1B	necroptosis
TRAF2	necroptosis
PANX1	necroptosis
OTULIN	necroptosis
CYLD	necroptosis
USP22	necroptosis
MAP3K7	necroptosis
SQSTM1	necroptosis
STAT3	necroptosis
DIABLO	necroptosis
DNMT1	necroptosis
CFLAR	necroptosis
BRAF	necroptosis
AXL	necroptosis
ID1	necroptosis
CDKN2A	necroptosis
HSPA4	necroptosis
BCL2	necroptosis
STUB1	necroptosis
FLT3	necroptosis
HAT1	necroptosis
SIRT2	necroptosis
SIRT1	necroptosis
PLK1	necroptosis
MPG	necroptosis
BACH2	necroptosis
GATA3	necroptosis
MYCN	necroptosis
ALK	necroptosis
ATRX	necroptosis
TERT	necroptosis
SLC39A7	necroptosis
SPATA2	necroptosis
RNF31	necroptosis
IDH1	necroptosis
IDH2	necroptosis
KLF9	necroptosis
HDAC9	necroptosis
HSP90AA1	necroptosis
LEF1	necroptosis
BNIP3	necroptosis
CD40	necroptosis
BCL2L11	necroptosis
EGFR	necroptosis
DDX58	necroptosis
TARDBP	necroptosis
APP	necroptosis
TNFRSF21	necroptosis

## Sheet: S3
Table S3: The necroptosis values of 67 NRGs in patients with colon cancer
id	HR	HR.95L	HR.95H	pvalue	km
FADD	1.16058	0.876442	1.53682	0.298609	0.0837872
FAS	0.978531	0.871492	1.09872	0.713484	0.120563
FASLG	0.924969	0.739284	1.15729	0.495106	0.0401026
MLKL	1.06859	0.840568	1.35847	0.588009	0.0456218
RIPK1	1.27436	0.956068	1.69861	0.0982193	0.00199825
RIPK3	0.681762	0.536531	0.866306	0.00172342	5.57071e-05
TLR3	0.867102	0.749563	1.00307	0.0550242	0.0127851
TNF	1.01882	0.808426	1.28396	0.874481	0.0494891
TSC1	1.31802	1.01469	1.71202	0.0385233	0.00436879
TRIM11	1.21003	0.892973	1.63965	0.218787	0.0687639
CASP8	0.811895	0.629738	1.04674	0.107934	0.0301578
ZBP1	0.79965	0.661715	0.966337	0.020644	0.00119077
MAPK8	0.994419	0.736776	1.34216	0.970818	0.165979
IPMK	0.972344	0.791131	1.19507	0.789843	0.0984251
ITPK1	1.04854	0.780719	1.40825	0.75276	0.0660392
SIRT3	0.859512	0.586799	1.25897	0.436922	0.00176823
MYC	0.846595	0.745728	0.961104	0.0100853	0.00058409
TNFRSF1A	1.19433	0.921135	1.54856	0.180222	0.000823612
TNFSF10	0.862472	0.749062	0.993053	0.039698	0.000814048
TNFRSF1B	0.817334	0.682525	0.97877	0.0282862	0.00315338
TRAF2	1.07018	0.793229	1.44383	0.657097	0.319931
PANX1	1.57291	1.23812	1.99823	0.000207994	2.1179e-05
OTULIN	0.826073	0.581034	1.17445	0.287201	0.207797
CYLD	1.18315	0.913256	1.5328	0.20299	0.0706656
USP22	1.06537	0.782894	1.44978	0.687047	0.190734
MAP3K7	1.45432	1.13052	1.87087	0.00356163	0.000313783
SQSTM1	1.08055	0.81704	1.42905	0.586998	0.114628
STAT3	0.944499	0.711985	1.25294	0.692086	0.0390244
DIABLO	0.989245	0.694394	1.40929	0.952246	0.235597
DNMT1	1.05224	0.87172	1.27013	0.595932	0.148152
CFLAR	0.897428	0.688031	1.17055	0.424688	0.0384704
BRAF	1.2288	0.957553	1.57688	0.105423	0.0961887
AXL	1.2596	1.08828	1.45788	0.00197386	3.35502e-05
ID1	0.932889	0.867052	1.00373	0.0628321	0.000705925
CDKN2A	1.20308	1.06816	1.35504	0.00231554	0.000726495
HSPA4	1.01654	0.795256	1.29939	0.895804	0.16275
BCL2	0.733908	0.592402	0.909216	0.00464294	0.000695169
STUB1	0.970386	0.741652	1.26966	0.826509	0.00321419
FLT3	0.80634	0.556701	1.16792	0.254806	0.00471262
HAT1	0.950237	0.785869	1.14898	0.59836	0.103417
SIRT2	1.11756	0.802755	1.55581	0.510263	0.0937022
SIRT1	1.14202	0.935771	1.39374	0.191297	0.057206
PLK1	0.80314	0.680916	0.947303	0.00924985	0.00104081
MPG	0.869602	0.684032	1.10552	0.253921	0.0140796
BACH2	1.49017	1.15245	1.92685	0.00234984	0.000592099
GATA3	0.899459	0.710081	1.13934	0.379694	0.00109024
MYCN	0.871471	0.728207	1.04292	0.133265	0.0113583
ALK	1.10267	0.706166	1.7218	0.667315	0.0472221
ATRX	1.16407	0.972134	1.3939	0.0984228	0.0402376
TERT	1.02792	0.824477	1.28156	0.806669	0.0155939
SLC39A7	0.918389	0.743507	1.1344	0.429586	0.0285405
SPATA2	0.734443	0.604595	0.892178	0.0018752	0.00278556
RNF31	1.00778	0.733096	1.38539	0.96193	0.253005
IDH1	0.7264	0.565232	0.933523	0.0125106	0.00440862
IDH2	0.819238	0.691797	0.970157	0.0208236	0.00115712
KLF9	1.02676	0.869478	1.21249	0.755599	0.119453
HDAC9	1.42897	1.10182	1.85326	0.0071256	0.00333413
HSP90AA1	1.22098	0.986823	1.51071	0.0660822	0.00752027
LEF1	1.25703	1.08361	1.45819	0.00252664	0.000823887
BNIP3	0.993319	0.922621	1.06944	0.858771	0.154452
CD40	1.02771	0.886004	1.19209	0.718011	0.0266481
BCL2L11	1.21714	0.936976	1.58107	0.140957	0.0232089
EGFR	1.02922	0.830384	1.27566	0.792607	0.104923
DDX58	0.996816	0.855324	1.16172	0.967435	0.282003
TARDBP	1.00645	0.764798	1.32445	0.963413	0.144552
APP	1.02339	0.799606	1.3098	0.854309	0.27472
TNFRSF21	1.13538	0.926709	1.39104	0.220434	0.0182435
	postive
	postive
	postive
	postive
	negative
	postive
	postive
	postive
	postive
	negative

## Sheet: S4
Table S4: Spearman correlation analysis of the 48 pyroptosis-related genes.
From	To	Cor	P-value	Color	Weight
FADD	RIPK3	0.122363	3.32826e-05	pink	0.734176
FADD	TSC1	-0.206702	1.66479e-12	#6495ED	1.24021
FADD	TRIM11	0.199049	1.097e-11	pink	1.19429
FADD	CASP8	0.158038	7.73189e-08	pink	0.948226
FADD	ITPK1	0.229632	3.72988e-15	pink	1.37779
FADD	SIRT3	0.116968	7.32354e-05	pink	0.70181
FADD	MYC	0.193832	3.80129e-11	pink	1.16299
FADD	TNFRSF1A	0.132477	6.93343e-06	pink	0.794864
FADD	TNFRSF1B	0.122093	3.465e-05	pink	0.732556
FADD	TRAF2	0.212269	4.02983e-13	pink	1.27361
FADD	PANX1	0.166764	1.39447e-08	pink	1.00058
FADD	CYLD	-0.129022	1.20076e-05	#6495ED	0.774131
FADD	DIABLO	0.152271	2.28083e-07	pink	0.913628
FADD	DNMT1	0.136144	3.81345e-06	pink	0.816863
FADD	BRAF	-0.250431	8.07953e-18	#6495ED	1.50259
FADD	ID1	0.154529	1.50025e-07	pink	0.927177
FADD	CDKN2A	0.173088	3.80412e-09	pink	1.03853
FADD	STUB1	0.240094	1.83255e-16	pink	1.44057
FADD	PLK1	0.342828	6.7534e-33	pink	2.05697
FADD	MPG	0.266891	4.14186e-20	pink	1.60135
FADD	ATRX	-0.161481	3.97656e-08	#6495ED	0.968885
FADD	SLC39A7	0.129224	1.16331e-05	pink	0.775341
FADD	RNF31	0.206534	1.73627e-12	pink	1.23921
FADD	IDH2	0.157873	7.97897e-08	pink	0.947238
FADD	KLF9	-0.16372	2.56068e-08	#6495ED	0.982323
FADD	CD40	0.133944	5.46859e-06	pink	0.803667
FADD	TARDBP	-0.206018	1.97596e-12	#6495ED	1.23611
FAS	FASLG	0.304908	4.86913e-26	pink	1.82945
FAS	MLKL	0.2186	7.64818e-14	pink	1.3116
FAS	RIPK1	0.372759	5.02062e-39	pink	2.23655
FAS	TLR3	0.577485	1.01095e-102	pink	3.46491
FAS	TRIM11	-0.256729	1.12299e-18	#6495ED	1.54037
FAS	CASP8	0.218484	7.88897e-14	pink	1.3109
FAS	MAPK8	0.359122	3.75499e-36	pink	2.15473
FAS	IPMK	0.30708	2.09318e-26	pink	1.84248
FAS	MYC	-0.252595	4.12594e-18	#6495ED	1.51557
FAS	TNFRSF1A	0.165462	1.81083e-08	pink	0.992773
FAS	TNFSF10	0.552198	2.69796e-92	pink	3.31319
FAS	TRAF2	-0.275324	2.39961e-21	#6495ED	1.65194
FAS	PANX1	0.227338	7.08209e-15	pink	1.36403
FAS	CYLD	0.430269	9.30265e-53	pink	2.58161
FAS	MAP3K7	0.122831	3.10335e-05	pink	0.736983
FAS	SQSTM1	-0.169086	8.70267e-09	#6495ED	1.01452
FAS	STAT3	0.186559	2.03051e-10	pink	1.11936
FAS	CFLAR	0.252207	4.65726e-18	pink	1.51324
FAS	AXL	0.179351	1.00156e-09	pink	1.0761
FAS	ID1	-0.16722	1.27163e-08	#6495ED	1.00332
FAS	CDKN2A	-0.14884	4.26104e-07	#6495ED	0.893039
FAS	HSPA4	0.236072	5.93879e-16	pink	1.41643
FAS	BCL2	0.327577	5.07637e-30	pink	1.96546
FAS	STUB1	-0.15813	7.59692e-08	#6495ED	0.948779
FAS	HAT1	0.238423	2.99505e-16	pink	1.43054
FAS	SIRT2	-0.193719	3.90359e-11	#6495ED	1.16231
FAS	SIRT1	0.317835	2.8771e-28	pink	1.90701
FAS	PLK1	-0.178018	1.33597e-09	#6495ED	1.06811
FAS	MPG	-0.126956	1.65653e-05	#6495ED	0.761734
FAS	BACH2	0.129746	1.07151e-05	pink	0.778473
FAS	GATA3	0.166465	1.48092e-08	pink	0.998789
FAS	MYCN	-0.155368	1.28213e-07	#6495ED	0.932208
FAS	TERT	-0.210196	6.86541e-13	#6495ED	1.26118
FAS	SPATA2	-0.438867	4.73575e-55	#6495ED	2.6332
FAS	IDH1	0.127437	1.53763e-05	pink	0.76462
FAS	KLF9	0.379692	1.53351e-40	pink	2.27815
FAS	HDAC9	0.282542	1.93341e-22	pink	1.69525
FAS	CD40	0.200781	7.20567e-12	pink	1.20469
FAS	BCL2L11	0.217924	9.1545e-14	pink	1.30755
FAS	DDX58	0.393198	1.34162e-43	pink	2.35919
FAS	TNFRSF21	0.19171	6.24001e-11	pink	1.15026
FASLG	MLKL	0.221297	3.70866e-14	pink	1.32778
FASLG	RIPK1	0.259706	4.33444e-19	pink	1.55824
FASLG	TLR3	0.224051	1.75389e-14	pink	1.34431
FASLG	TNF	0.240468	1.64116e-16	pink	1.44281
FASLG	ZBP1	0.244295	5.24495e-17	pink	1.46577
FASLG	ITPK1	0.121994	3.51614e-05	pink	0.731966
FASLG	TNFRSF1A	0.169214	8.47883e-09	pink	1.01528
FASLG	TNFSF10	0.259667	4.38991e-19	pink	1.558
FASLG	TNFRSF1B	0.269656	1.64598e-20	pink	1.61794
FASLG	TRAF2	0.134945	4.64434e-06	pink	0.809673
FASLG	PANX1	0.115735	8.73023e-05	pink	0.694408
FASLG	CYLD	0.312949	2.06197e-27	pink	1.8777
FASLG	STAT3	0.132219	7.228e-06	pink	0.793312
FASLG	DNMT1	0.157478	8.60358e-08	pink	0.944865
FASLG	CFLAR	0.174349	2.91909e-09	pink	1.04609
FASLG	AXL	0.183939	3.65359e-10	pink	1.10364
FASLG	ID1	-0.131801	7.72836e-06	#6495ED	0.790807
FASLG	BCL2	0.318746	1.98526e-28	pink	1.91247
FASLG	FLT3	0.166075	1.60176e-08	pink	0.996447
FASLG	GATA3	0.356265	1.44245e-35	pink	2.13759
FASLG	ALK	0.15197	2.41068e-07	pink	0.911823
FASLG	SPATA2	-0.190655	7.9685e-11	#6495ED	1.14393
FASLG	CD40	0.336624	1.04486e-31	pink	2.01974
FASLG	BCL2L11	0.225235	1.26717e-14	pink	1.35141
FASLG	DDX58	0.344878	2.69408e-33	pink	2.06927
FASLG	APP	-0.138379	2.62839e-06	#6495ED	0.830275
MLKL	RIPK1	0.12829	1.34648e-05	pink	0.76974
MLKL	TLR3	0.135174	4.47385e-06	pink	0.811041
MLKL	TNF	0.122852	3.09355e-05	pink	0.73711
MLKL	TRIM11	0.229366	4.01902e-15	pink	1.3762
MLKL	CASP8	0.175634	2.22421e-09	pink	1.0538
MLKL	ZBP1	0.199832	9.07492e-12	pink	1.19899
MLKL	TNFSF10	0.156796	9.79255e-08	pink	0.940777
MLKL	TNFRSF1B	0.143853	1.03088e-06	pink	0.863116
MLKL	PANX1	0.179852	8.98192e-10	pink	1.07911
MLKL	OTULIN	0.165668	1.73791e-08	pink	0.994006
MLKL	CYLD	0.170984	5.8926e-09	pink	1.0259
MLKL	STAT3	0.176631	1.79878e-09	pink	1.05978
MLKL	DNMT1	0.254293	2.42472e-18	pink	1.52576
MLKL	CFLAR	0.185595	2.52337e-10	pink	1.11357
MLKL	ID1	-0.11569	8.78617e-05	#6495ED	0.694138
MLKL	HSPA4	0.235981	6.09744e-16	pink	1.41589
MLKL	PLK1	0.19615	2.1978e-11	pink	1.1769
MLKL	IDH1	0.152757	2.08522e-07	pink	0.916545
MLKL	HSP90AA1	0.176634	1.79728e-09	pink	1.05981
MLKL	CD40	0.166989	1.33238e-08	pink	1.00194
MLKL	DDX58	0.240046	1.85881e-16	pink	1.44028
RIPK1	RIPK3	0.260443	3.41795e-19	pink	1.56266
RIPK1	TLR3	0.452431	8.33968e-59	pink	2.71459
RIPK1	TSC1	0.184571	3.17337e-10	pink	1.10743
RIPK1	CASP8	0.245615	3.52229e-17	pink	1.47369
RIPK1	MAPK8	0.333089	4.83917e-31	pink	1.99853
RIPK1	IPMK	0.211493	4.92272e-13	pink	1.26896
RIPK1	MYC	-0.288449	2.3272e-23	#6495ED	1.7307
RIPK1	TNFRSF1A	0.205886	2.04271e-12	pink	1.23531
RIPK1	TNFSF10	0.418718	8.84919e-50	pink	2.51231
RIPK1	PANX1	0.19029	8.66867e-11	pink	1.14174
RIPK1	CYLD	0.403041	6.41433e-46	pink	2.41825
RIPK1	USP22	0.171999	4.77368e-09	pink	1.032
RIPK1	MAP3K7	0.240132	1.81205e-16	pink	1.44079
RIPK1	SQSTM1	-0.117336	6.94753e-05	#6495ED	0.704016
RIPK1	STAT3	0.265211	7.21829e-20	pink	1.59127
RIPK1	CFLAR	0.298111	6.53298e-25	pink	1.78867
RIPK1	AXL	0.160029	5.27285e-08	pink	0.960173
RIPK1	HSPA4	0.139514	2.17116e-06	pink	0.837082
RIPK1	BCL2	0.237226	4.2481e-16	pink	1.42335
RIPK1	FLT3	0.127466	1.53068e-05	pink	0.764796
RIPK1	SIRT1	0.225431	1.20068e-14	pink	1.35259
RIPK1	MPG	-0.144881	8.61287e-07	#6495ED	0.869285
RIPK1	BACH2	0.150068	3.41249e-07	pink	0.900408
RIPK1	GATA3	0.137907	2.84461e-06	pink	0.827443
RIPK1	ALK	0.134357	5.11346e-06	pink	0.80614
RIPK1	TERT	-0.118989	5.47171e-05	#6495ED	0.713933
RIPK1	SLC39A7	0.283984	1.15862e-22	pink	1.7039
RIPK1	SPATA2	-0.146176	6.85538e-07	#6495ED	0.877057
RIPK1	KLF9	0.364907	2.35676e-37	pink	2.18944
RIPK1	HDAC9	0.249155	1.1971e-17	pink	1.49493
RIPK1	BCL2L11	0.337814	6.20915e-32	pink	2.02688
RIPK1	EGFR	0.145897	7.20277e-07	pink	0.875379
RIPK1	DDX58	0.428682	2.42556e-52	pink	2.57209
RIPK1	TARDBP	0.133234	6.13669e-06	pink	0.799403
RIPK1	TNFRSF21	0.333478	4.09227e-31	pink	2.00087
RIPK3	TLR3	0.21499	1.9855e-13	pink	1.28994
RIPK3	ZBP1	0.155169	1.33095e-07	pink	0.931014
RIPK3	ITPK1	0.250081	8.99985e-18	pink	1.50049
RIPK3	SIRT3	0.267379	3.52212e-20	pink	1.60427
RIPK3	MYC	-0.14533	7.95981e-07	#6495ED	0.871978
RIPK3	TNFRSF1A	0.166664	1.42269e-08	pink	0.999985
RIPK3	TNFSF10	0.203554	3.64827e-12	pink	1.22132
RIPK3	PANX1	-0.24263	8.63594e-17	#6495ED	1.45578
RIPK3	OTULIN	-0.175953	2.07835e-09	#6495ED	1.05572
RIPK3	MAP3K7	-0.150554	3.12364e-07	#6495ED	0.903326
RIPK3	DNMT1	-0.24094	1.42711e-16	#6495ED	1.44564
RIPK3	BRAF	-0.159549	5.78539e-08	#6495ED	0.957291
RIPK3	HSPA4	-0.197637	1.54069e-11	#6495ED	1.18582
RIPK3	HAT1	-0.232255	1.77661e-15	#6495ED	1.39353
RIPK3	SIRT2	0.176591	1.81402e-09	pink	1.05955
RIPK3	ATRX	-0.184775	3.03242e-10	#6495ED	1.10865
RIPK3	SPATA2	0.121741	3.65134e-05	pink	0.730443
RIPK3	RNF31	0.144264	9.59423e-07	pink	0.865587
RIPK3	HSP90AA1	-0.20691	1.57989e-12	#6495ED	1.24146
RIPK3	EGFR	0.139383	2.21961e-06	pink	0.836298
RIPK3	TARDBP	-0.152796	2.07034e-07	#6495ED	0.916777
RIPK3	APP	0.134742	4.80165e-06	pink	0.808451
RIPK3	TNFRSF21	0.124114	2.55808e-05	pink	0.744684
TLR3	TSC1	0.120288	4.52506e-05	pink	0.72173
TLR3	TRIM11	-0.192084	5.72124e-11	#6495ED	1.1525
TLR3	CASP8	0.251505	5.79272e-18	pink	1.50903
TLR3	ZBP1	0.175344	2.36521e-09	pink	1.05206
TLR3	MAPK8	0.320057	1.16061e-28	pink	1.92034
TLR3	IPMK	0.285559	6.5995e-23	pink	1.71335
TLR3	MYC	-0.273322	4.76216e-21	#6495ED	1.63993
TLR3	TNFRSF1A	0.162435	3.29882e-08	pink	0.974613
TLR3	TNFSF10	0.601362	1.93719e-113	pink	3.60817
TLR3	TRAF2	-0.205854	2.05921e-12	#6495ED	1.23512
TLR3	CYLD	0.412676	2.87787e-48	pink	2.47606
TLR3	MAP3K7	0.129469	1.11923e-05	pink	0.776815
TLR3	SQSTM1	-0.140329	1.89071e-06	#6495ED	0.841975
TLR3	STAT3	0.228986	4.47185e-15	pink	1.37391
TLR3	DNMT1	-0.187237	1.74181e-10	#6495ED	1.12342
TLR3	CFLAR	0.270947	1.06572e-20	pink	1.62568
TLR3	BRAF	0.132283	7.15327e-06	pink	0.7937
TLR3	CDKN2A	-0.152858	2.04672e-07	#6495ED	0.91715
TLR3	HSPA4	0.121479	3.79614e-05	pink	0.728871
TLR3	BCL2	0.345415	2.11571e-33	pink	2.07249
TLR3	STUB1	-0.212333	3.96293e-13	#6495ED	1.274
TLR3	HAT1	0.116981	7.31079e-05	pink	0.701883
TLR3	SIRT1	0.260355	3.51652e-19	pink	1.56213
TLR3	PLK1	-0.267664	3.20365e-20	#6495ED	1.60598
TLR3	MPG	-0.177764	1.41088e-09	#6495ED	1.06658
TLR3	ATRX	0.116568	7.7548e-05	pink	0.699408
TLR3	TERT	-0.166667	1.42174e-08	#6495ED	1
TLR3	SPATA2	-0.247203	2.17535e-17	#6495ED	1.48322
TLR3	IDH1	0.14929	3.92903e-07	pink	0.895738
TLR3	KLF9	0.331948	7.90414e-31	pink	1.99169
TLR3	HDAC9	0.252727	3.9598e-18	pink	1.51636
TLR3	BCL2L11	0.216133	1.47044e-13	pink	1.2968
TLR3	DDX58	0.442949	3.65868e-56	pink	2.6577
TLR3	APP	0.133226	6.14433e-06	pink	0.799357
TLR3	TNFRSF21	0.155605	1.22625e-07	pink	0.933631
TNF	ZBP1	0.212245	4.05478e-13	pink	1.27347
TNF	TNFRSF1A	0.217761	9.55962e-14	pink	1.30657
TNF	TNFRSF1B	0.212808	3.50518e-13	pink	1.27685
TNF	PANX1	0.205784	2.0954e-12	pink	1.2347
TNF	CYLD	0.146882	6.04885e-07	pink	0.881291
TNF	STAT3	0.254733	2.1112e-18	pink	1.5284
TNF	DNMT1	0.125075	2.21091e-05	pink	0.750448
TNF	CFLAR	0.16292	2.99914e-08	pink	0.977519
TNF	AXL	0.235761	6.49786e-16	pink	1.41457
TNF	FLT3	0.141584	1.52585e-06	pink	0.849506
TNF	PLK1	0.124108	2.56048e-05	pink	0.744647
TNF	BACH2	0.178838	1.11921e-09	pink	1.07303
TNF	GATA3	0.242368	9.33718e-17	pink	1.45421
TNF	IDH1	-0.122562	3.23065e-05	#6495ED	0.735371
TNF	CD40	0.250707	7.41794e-18	pink	1.50424
TNF	BCL2L11	0.120215	4.57388e-05	pink	0.721292
TNF	DDX58	0.162021	3.57837e-08	pink	0.972123
TSC1	MAPK8	0.12245	3.28515e-05	pink	0.7347
TSC1	ITPK1	-0.120666	4.28032e-05	#6495ED	0.723998
TSC1	SIRT3	0.140581	1.81148e-06	pink	0.843484
TSC1	TNFSF10	0.129678	1.08291e-05	pink	0.778071
TSC1	TRAF2	0.14066	1.78708e-06	pink	0.843961
TSC1	CYLD	0.312606	2.36507e-27	pink	1.87563
TSC1	MAP3K7	0.231557	2.16626e-15	pink	1.38934
TSC1	STAT3	0.154869	1.40781e-07	pink	0.929217
TSC1	CFLAR	0.269509	1.72936e-20	pink	1.61705
TSC1	BRAF	0.363576	4.47897e-37	pink	2.18146
TSC1	ID1	-0.17694	1.68374e-09	#6495ED	1.06164
TSC1	BCL2	0.163985	2.43005e-08	pink	0.983909
TSC1	SIRT2	0.114902	9.82013e-05	pink	0.689412
TSC1	SIRT1	0.227964	5.94925e-15	pink	1.36779
TSC1	PLK1	-0.216857	1.21473e-13	#6495ED	1.30114
TSC1	MPG	-0.265452	6.66759e-20	#6495ED	1.59271
TSC1	BACH2	0.171952	4.82103e-09	pink	1.03171
TSC1	ATRX	0.310693	5.05712e-27	pink	1.86416
TSC1	IDH2	-0.147814	5.12229e-07	#6495ED	0.886885
TSC1	KLF9	0.1957	2.44565e-11	pink	1.1742
TSC1	HDAC9	0.131086	8.66347e-06	pink	0.786517
TSC1	BCL2L11	0.223262	2.17604e-14	pink	1.33957
TSC1	EGFR	0.198171	1.35542e-11	pink	1.18903
TSC1	DDX58	0.242802	8.20402e-17	pink	1.45681
TSC1	TARDBP	0.40754	5.25288e-47	pink	2.44524
TSC1	APP	0.165981	1.63219e-08	pink	0.995885
TRIM11	MAPK8	-0.187498	1.64173e-10	#6495ED	1.12499
TRIM11	ITPK1	0.194277	3.42369e-11	pink	1.16566
TRIM11	SIRT3	0.117055	7.23337e-05	pink	0.702329
TRIM11	TNFSF10	-0.230816	2.67145e-15	#6495ED	1.3849
TRIM11	TRAF2	0.377836	3.93588e-40	pink	2.26701
TRIM11	OTULIN	0.180155	8.40823e-10	pink	1.08093
TRIM11	CYLD	-0.161443	4.00601e-08	#6495ED	0.968659
TRIM11	USP22	0.254218	2.48216e-18	pink	1.52531
TRIM11	SQSTM1	0.218744	7.36043e-14	pink	1.31246
TRIM11	DNMT1	0.339915	2.46227e-32	pink	2.03949
TRIM11	AXL	-0.187332	1.70487e-10	#6495ED	1.12399
TRIM11	STUB1	0.213357	3.0399e-13	pink	1.28014
TRIM11	SIRT2	0.130837	9.01381e-06	pink	0.785023
TRIM11	SIRT1	-0.145333	7.95528e-07	#6495ED	0.871997
TRIM11	PLK1	0.355383	2.18012e-35	pink	2.1323
TRIM11	MPG	0.12122	3.94406e-05	pink	0.727323
TRIM11	BACH2	-0.119232	5.28156e-05	#6495ED	0.715391
TRIM11	MYCN	0.196342	2.09936e-11	pink	1.17805
TRIM11	TERT	0.216376	1.37935e-13	pink	1.29825
TRIM11	SLC39A7	0.167594	1.17904e-08	pink	1.00556
TRIM11	SPATA2	0.211986	4.33485e-13	pink	1.27192
TRIM11	RNF31	0.233399	1.28172e-15	pink	1.4004
TRIM11	KLF9	-0.119465	5.10504e-05	#6495ED	0.716789
TRIM11	HDAC9	-0.181432	6.35958e-10	#6495ED	1.08859
TRIM11	HSP90AA1	0.125183	2.17472e-05	pink	0.751097
CASP8	ZBP1	0.147364	5.55106e-07	pink	0.884185
CASP8	MAPK8	0.332438	6.40466e-31	pink	1.99463
CASP8	IPMK	0.354224	3.74299e-35	pink	2.12534
CASP8	MYC	0.15461	1.4778e-07	pink	0.927661
CASP8	TNFSF10	0.327542	5.15248e-30	pink	1.96525
CASP8	TRAF2	-0.129997	1.02982e-05	#6495ED	0.779981
CASP8	PANX1	0.135157	4.48591e-06	pink	0.810943
CASP8	OTULIN	0.131475	8.14213e-06	pink	0.788851
CASP8	CYLD	0.158399	7.21552e-08	pink	0.950394
CASP8	MAP3K7	0.291085	8.90282e-24	pink	1.74651
CASP8	STAT3	0.135496	4.24337e-06	pink	0.812974
CASP8	DIABLO	0.194207	3.48048e-11	pink	1.16524
CASP8	CFLAR	0.419355	6.10564e-50	pink	2.51613
CASP8	BRAF	0.197684	1.52345e-11	pink	1.1861
CASP8	AXL	-0.12386	2.65808e-05	#6495ED	0.743162
CASP8	ID1	0.160403	4.9046e-08	pink	0.962416
CASP8	HSPA4	0.366053	1.35261e-37	pink	2.19632
CASP8	BCL2	0.120973	4.09094e-05	pink	0.725839
CASP8	STUB1	-0.236921	4.64244e-16	#6495ED	1.42152
CASP8	FLT3	0.14271	1.25693e-06	pink	0.856261
CASP8	HAT1	0.343204	5.70861e-33	pink	2.05922
CASP8	SIRT2	-0.123032	3.01095e-05	#6495ED	0.738193
CASP8	SIRT1	0.250726	7.37426e-18	pink	1.50436
CASP8	ATRX	0.243961	5.7985e-17	pink	1.46376
CASP8	IDH1	0.314568	1.07799e-27	pink	1.88741
CASP8	HSP90AA1	0.12443	2.43852e-05	pink	0.74658
CASP8	EGFR	0.193791	3.83814e-11	pink	1.16275
CASP8	DDX58	0.174664	2.73116e-09	pink	1.04799
CASP8	TARDBP	0.193373	4.23324e-11	pink	1.16024
CASP8	APP	0.148386	4.6234e-07	pink	0.890316
CASP8	TNFRSF21	0.217144	1.12581e-13	pink	1.30287
ZBP1	MAPK8	-0.133085	6.28659e-06	#6495ED	0.798508
ZBP1	TNFRSF1A	0.193038	4.57877e-11	pink	1.15823
ZBP1	TNFSF10	0.318726	2.00124e-28	pink	1.91236
ZBP1	TNFRSF1B	0.289632	1.51396e-23	pink	1.73779
ZBP1	TRAF2	0.139858	2.04817e-06	pink	0.839148
ZBP1	CYLD	0.239907	1.93668e-16	pink	1.43944
ZBP1	SQSTM1	0.145133	8.24029e-07	pink	0.870796
ZBP1	STAT3	0.215372	1.79606e-13	pink	1.29223
ZBP1	CFLAR	0.359655	2.91553e-36	pink	2.15793
ZBP1	AXL	0.154086	1.62969e-07	pink	0.924516
ZBP1	BCL2	0.126528	1.76946e-05	pink	0.75917
ZBP1	SIRT2	0.130174	1.00131e-05	pink	0.781046
ZBP1	SIRT1	-0.124783	2.31131e-05	#6495ED	0.748697
ZBP1	BACH2	0.122443	3.28879e-05	pink	0.734655
ZBP1	GATA3	0.193049	4.56759e-11	pink	1.15829
ZBP1	RNF31	0.20372	3.50133e-12	pink	1.22232
ZBP1	IDH1	-0.173123	3.77634e-09	#6495ED	1.03874
ZBP1	HDAC9	0.165723	1.71887e-08	pink	0.994336
ZBP1	CD40	0.315701	6.83223e-28	pink	1.89421
ZBP1	BCL2L11	0.152576	2.15611e-07	pink	0.915458
ZBP1	DDX58	0.385099	9.52004e-42	pink	2.31059
MAPK8	IPMK	0.528599	2.4352e-83	pink	3.17159
MAPK8	ITPK1	-0.231622	2.1265e-15	#6495ED	1.38973
MAPK8	TNFRSF1A	-0.135722	4.08795e-06	#6495ED	0.814334
MAPK8	TNFSF10	0.29254	5.2136e-24	pink	1.75524
MAPK8	TNFRSF1B	-0.161994	3.59736e-08	#6495ED	0.971961
MAPK8	TRAF2	-0.267365	3.53853e-20	#6495ED	1.60419
MAPK8	PANX1	0.285464	6.82867e-23	pink	1.71278
MAPK8	OTULIN	0.235149	7.75449e-16	pink	1.41089
MAPK8	CYLD	0.304753	5.17007e-26	pink	1.82852
MAPK8	MAP3K7	0.450614	2.71574e-58	pink	2.70369
MAPK8	SQSTM1	-0.146692	6.25601e-07	#6495ED	0.880154
MAPK8	DIABLO	0.162096	3.52572e-08	pink	0.972578
MAPK8	CFLAR	0.127462	1.53171e-05	pink	0.76477
MAPK8	BRAF	0.361383	1.2812e-36	pink	2.1683
MAPK8	CDKN2A	-0.161871	3.68464e-08	#6495ED	0.971226
MAPK8	HSPA4	0.367664	6.17532e-38	pink	2.20598
MAPK8	BCL2	0.115419	9.1287e-05	pink	0.692517
MAPK8	STUB1	-0.258974	5.48338e-19	#6495ED	1.55385
MAPK8	HAT1	0.400925	2.05419e-45	pink	2.40555
MAPK8	SIRT2	-0.1323	7.13399e-06	#6495ED	0.7938
MAPK8	SIRT1	0.591927	4.26064e-109	pink	3.55156
MAPK8	MPG	-0.271406	9.12749e-21	#6495ED	1.62843
MAPK8	ATRX	0.278723	7.3986e-22	pink	1.67234
MAPK8	RNF31	-0.119877	4.80653e-05	#6495ED	0.719262
MAPK8	IDH1	0.282096	2.26359e-22	pink	1.69258
MAPK8	KLF9	0.250519	7.86258e-18	pink	1.50311
MAPK8	HSP90AA1	0.204174	3.12897e-12	pink	1.22504
MAPK8	BCL2L11	0.248751	1.35527e-17	pink	1.4925
MAPK8	DDX58	0.202845	4.3457e-12	pink	1.21707
MAPK8	TARDBP	0.299352	4.08859e-25	pink	1.79611
MAPK8	APP	0.207165	1.48166e-12	pink	1.24299
MAPK8	TNFRSF21	0.159516	5.82147e-08	pink	0.957098
IPMK	TNFSF10	0.225992	1.02842e-14	pink	1.35595
IPMK	TRAF2	-0.117254	7.02961e-05	#6495ED	0.703525
IPMK	PANX1	0.146916	6.01266e-07	pink	0.881494
IPMK	OTULIN	0.267307	3.60801e-20	pink	1.60384
IPMK	CYLD	0.286871	4.11736e-23	pink	1.72123
IPMK	MAP3K7	0.382658	3.36053e-41	pink	2.29595
IPMK	DIABLO	0.131553	8.04121e-06	pink	0.789319
IPMK	CFLAR	0.142017	1.41665e-06	pink	0.852099
IPMK	BRAF	0.353499	5.24175e-35	pink	2.12099
IPMK	AXL	-0.202252	5.02855e-12	#6495ED	1.21351
IPMK	CDKN2A	-0.169749	7.59814e-09	#6495ED	1.0185
IPMK	HSPA4	0.33371	3.70217e-31	pink	2.00226
IPMK	BCL2	0.14646	6.51884e-07	pink	0.878762
IPMK	STUB1	-0.19838	1.28881e-11	#6495ED	1.19028
IPMK	HAT1	0.381095	7.49581e-41	pink	2.28657
IPMK	SIRT1	0.476299	7.74247e-66	pink	2.8578
IPMK	MPG	-0.22742	6.92255e-15	#6495ED	1.36452
IPMK	ATRX	0.289536	1.56787e-23	pink	1.73722
IPMK	IDH1	0.298991	4.68701e-25	pink	1.79394
IPMK	KLF9	0.125558	2.05368e-05	pink	0.753347
IPMK	HSP90AA1	0.177687	1.43451e-09	pink	1.06612
IPMK	EGFR	0.13155	8.04507e-06	pink	0.789301
IPMK	TARDBP	0.281467	2.82681e-22	pink	1.6888
IPMK	TNFRSF21	0.180138	8.44047e-10	pink	1.08083
ITPK1	SIRT3	0.269118	1.97118e-20	pink	1.61471
ITPK1	TNFRSF1A	0.293648	3.4625e-24	pink	1.76189
ITPK1	TNFRSF1B	0.125733	1.99938e-05	pink	0.754398
ITPK1	TRAF2	0.245612	3.5254e-17	pink	1.47367
ITPK1	PANX1	-0.210391	6.531e-13	#6495ED	1.26235
ITPK1	OTULIN	-0.16319	2.84353e-08	#6495ED	0.979141
ITPK1	CYLD	-0.205159	2.44918e-12	#6495ED	1.23095
ITPK1	USP22	0.180214	8.30047e-10	pink	1.08129
ITPK1	MAP3K7	-0.35019	2.41319e-34	#6495ED	2.10114
ITPK1	SQSTM1	0.127253	1.58205e-05	pink	0.763518
ITPK1	CFLAR	-0.124239	2.51028e-05	#6495ED	0.745432
ITPK1	BRAF	-0.306981	2.1755e-26	#6495ED	1.84189
ITPK1	CDKN2A	0.123479	2.8154e-05	pink	0.740873
ITPK1	BCL2	0.128542	1.29455e-05	pink	0.77125
ITPK1	STUB1	0.343153	5.84094e-33	pink	2.05892
ITPK1	HAT1	-0.250857	7.08281e-18	#6495ED	1.50514
ITPK1	SIRT2	0.189764	9.78366e-11	pink	1.13858
ITPK1	SIRT1	-0.168544	9.7208e-09	#6495ED	1.01127
ITPK1	PLK1	0.228687	4.86212e-15	pink	1.37212
ITPK1	MPG	0.222716	2.52444e-14	pink	1.3363
ITPK1	BACH2	-0.136123	3.82671e-06	#6495ED	0.816737
ITPK1	MYCN	0.149594	3.71843e-07	pink	0.897566
ITPK1	ATRX	-0.298487	5.67031e-25	#6495ED	1.79092
ITPK1	TERT	0.190862	7.59621e-11	pink	1.14517
ITPK1	SLC39A7	0.153614	1.77938e-07	pink	0.921682
ITPK1	RNF31	0.476857	5.2212e-66	pink	2.86114
ITPK1	IDH2	0.175213	2.43168e-09	pink	1.05128
ITPK1	HDAC9	-0.15257	2.15873e-07	#6495ED	0.915419
ITPK1	LEF1	-0.157872	7.98086e-08	#6495ED	0.94723
ITPK1	BNIP3	-0.141378	1.58089e-06	#6495ED	0.848266
ITPK1	EGFR	0.223601	1.98348e-14	pink	1.34161
ITPK1	DDX58	-0.132027	7.45406e-06	#6495ED	0.79216
ITPK1	TARDBP	-0.191402	6.70218e-11	#6495ED	1.14841
ITPK1	TNFRSF21	0.130223	9.93643e-06	pink	0.781338
SIRT3	TRAF2	0.234049	1.06417e-15	pink	1.40429
SIRT3	USP22	0.220876	4.15544e-14	pink	1.32525
SIRT3	MAP3K7	-0.167743	1.14406e-08	#6495ED	1.00646
SIRT3	SQSTM1	0.166588	1.44454e-08	pink	0.999531
SIRT3	STAT3	0.219774	5.58753e-14	pink	1.31864
SIRT3	HSPA4	-0.127021	1.63989e-05	#6495ED	0.762126
SIRT3	BCL2	0.166233	1.55156e-08	pink	0.997399
SIRT3	STUB1	0.243536	6.58655e-17	pink	1.46122
SIRT3	HAT1	-0.26341	1.30382e-19	#6495ED	1.58046
SIRT3	SIRT2	0.159858	5.44966e-08	pink	0.959149
SIRT3	SLC39A7	0.143639	1.06993e-06	pink	0.861834
SIRT3	SPATA2	0.175269	2.40306e-09	pink	1.05162
SIRT3	RNF31	0.185072	2.83706e-10	pink	1.11043
SIRT3	IDH2	0.129266	1.1556e-05	pink	0.775595
SIRT3	HSP90AA1	-0.192838	4.79769e-11	#6495ED	1.15703
SIRT3	LEF1	-0.159416	5.93567e-08	#6495ED	0.956493
SIRT3	EGFR	0.216495	1.33648e-13	pink	1.29897
SIRT3	APP	0.197191	1.7142e-11	pink	1.18315
MYC	TNFRSF1A	-0.148821	4.27593e-07	#6495ED	0.892923
MYC	TNFSF10	-0.259795	4.21268e-19	#6495ED	1.55877
MYC	TRAF2	0.167334	1.24268e-08	pink	1.00401
MYC	OTULIN	0.19959	9.62301e-12	pink	1.19754
MYC	CYLD	-0.134271	5.18523e-06	#6495ED	0.805627
MYC	MAP3K7	0.153657	1.76523e-07	pink	0.92194
MYC	DNMT1	0.370129	1.84426e-38	pink	2.22077
MYC	BRAF	0.137204	3.19863e-06	pink	0.823225
MYC	ID1	0.211183	5.3307e-13	pink	1.2671
MYC	HSPA4	0.164395	2.24025e-08	pink	0.986368
MYC	BCL2	-0.148643	4.41485e-07	#6495ED	0.891857
MYC	HAT1	0.127294	1.57192e-05	pink	0.763767
MYC	PLK1	0.291955	6.46796e-24	pink	1.75173
MYC	BACH2	-0.163802	2.51956e-08	#6495ED	0.982814
MYC	ALK	-0.127601	1.49892e-05	#6495ED	0.765606
MYC	ATRX	0.223853	1.8514e-14	pink	1.34312
MYC	SPATA2	0.454384	2.32433e-59	pink	2.72631
MYC	IDH2	0.126983	1.64951e-05	pink	0.761899
MYC	KLF9	-0.353545	5.13161e-35	#6495ED	2.12127
MYC	HDAC9	-0.234363	9.72398e-16	#6495ED	1.40618
MYC	HSP90AA1	0.169286	8.35404e-09	pink	1.01572
MYC	BNIP3	0.232942	1.46069e-15	pink	1.39765
MYC	BCL2L11	-0.139061	2.34366e-06	#6495ED	0.834365
MYC	EGFR	0.11511	9.53611e-05	pink	0.690661
MYC	DDX58	-0.142845	1.22794e-06	#6495ED	0.857071
MYC	TARDBP	0.182712	4.79673e-10	pink	1.09627
TNFRSF1A	TNFSF10	0.142296	1.35017e-06	pink	0.853774
TNFRSF1A	TNFRSF1B	0.302447	1.25687e-25	pink	1.81468
TNFRSF1A	TRAF2	0.163988	2.42844e-08	pink	0.983929
TNFRSF1A	CYLD	0.191264	6.92115e-11	pink	1.14758
TNFRSF1A	SQSTM1	0.219921	5.37133e-14	pink	1.31953
TNFRSF1A	STAT3	0.37607	9.58696e-40	pink	2.25642
TNFRSF1A	CFLAR	0.230552	2.87843e-15	pink	1.38331
TNFRSF1A	BRAF	-0.151662	2.55136e-07	#6495ED	0.909969
TNFRSF1A	AXL	0.403085	6.26154e-46	pink	2.41851
TNFRSF1A	HSPA4	-0.130123	1.00956e-05	#6495ED	0.780735
TNFRSF1A	STUB1	0.247491	1.99237e-17	pink	1.48495
TNFRSF1A	HAT1	-0.219212	6.49547e-14	#6495ED	1.31527
TNFRSF1A	SIRT2	0.2171	1.13904e-13	pink	1.3026
TNFRSF1A	BACH2	0.24895	1.27483e-17	pink	1.4937
TNFRSF1A	GATA3	0.268091	2.77899e-20	pink	1.60854
TNFRSF1A	ALK	0.147204	5.71207e-07	pink	0.883223
TNFRSF1A	ATRX	-0.182861	4.6412e-10	#6495ED	1.09717
TNFRSF1A	SLC39A7	0.153995	1.65769e-07	pink	0.923967
TNFRSF1A	RNF31	0.127739	1.46718e-05	pink	0.766433
TNFRSF1A	IDH1	-0.201301	6.34685e-12	#6495ED	1.20781
TNFRSF1A	KLF9	0.27228	6.78803e-21	pink	1.63368
TNFRSF1A	HDAC9	0.221184	3.82409e-14	pink	1.3271
TNFRSF1A	HSP90AA1	-0.129514	1.11134e-05	#6495ED	0.777084
TNFRSF1A	CD40	0.262925	1.52721e-19	pink	1.57755
TNFRSF1A	BCL2L11	0.123752	2.70179e-05	pink	0.742513
TNFRSF1A	EGFR	0.117744	6.55195e-05	pink	0.706463
TNFRSF1A	DDX58	0.151224	2.76427e-07	pink	0.907344
TNFRSF1A	TNFRSF21	0.235857	6.31964e-16	pink	1.41514
TNFSF10	TRAF2	-0.207512	1.35761e-12	#6495ED	1.24507
TNFSF10	CYLD	0.497725	1.21412e-72	pink	2.98635
TNFSF10	MAP3K7	0.213003	3.33228e-13	pink	1.27802
TNFSF10	STAT3	0.253731	2.89198e-18	pink	1.52239
TNFSF10	DNMT1	-0.248891	1.29838e-17	#6495ED	1.49334
TNFSF10	CFLAR	0.473441	5.76192e-65	pink	2.84065
TNFSF10	BRAF	0.122463	3.2789e-05	pink	0.734776
TNFSF10	AXL	0.152922	2.02278e-07	pink	0.917532
TNFSF10	ID1	-0.141182	1.6346e-06	#6495ED	0.847095
TNFSF10	CDKN2A	-0.131307	8.36391e-06	#6495ED	0.787841
TNFSF10	BCL2	0.291326	8.1484e-24	pink	1.74796
TNFSF10	STUB1	-0.218439	7.98368e-14	#6495ED	1.31063
TNFSF10	HAT1	0.196356	2.09266e-11	pink	1.17813
TNFSF10	SIRT1	0.235697	6.61839e-16	pink	1.41418
TNFSF10	PLK1	-0.276767	1.45911e-21	#6495ED	1.6606
TNFSF10	MPG	-0.123465	2.82144e-05	#6495ED	0.740788
TNFSF10	BACH2	0.117877	6.42771e-05	pink	0.70726
TNFSF10	GATA3	0.1812	6.69111e-10	pink	1.0872
TNFSF10	MYCN	-0.192155	5.62658e-11	#6495ED	1.15293
TNFSF10	TERT	-0.155649	1.21606e-07	#6495ED	0.933897
TNFSF10	SPATA2	-0.200675	7.39453e-12	#6495ED	1.20405
TNFSF10	IDH1	0.166531	1.46142e-08	pink	0.999185
TNFSF10	KLF9	0.39651	2.26723e-44	pink	2.37906
TNFSF10	HDAC9	0.265633	6.28141e-20	pink	1.5938
TNFSF10	LEF1	-0.122774	3.1298e-05	#6495ED	0.736643
TNFSF10	CD40	0.24666	2.56568e-17	pink	1.47996
TNFSF10	BCL2L11	0.28873	2.10201e-23	pink	1.73238
TNFSF10	EGFR	0.132876	6.50242e-06	pink	0.797254
TNFSF10	DDX58	0.535718	5.74568e-86	pink	3.21431
TNFSF10	APP	0.174188	3.01992e-09	pink	1.04513
TNFSF10	TNFRSF21	0.185248	2.7276e-10	pink	1.11149
TNFRSF1B	TRAF2	0.229338	4.05091e-15	pink	1.37603
TNFRSF1B	PANX1	0.122532	3.24497e-05	pink	0.735194
TNFRSF1B	CYLD	0.21459	2.20459e-13	pink	1.28754
TNFRSF1B	SQSTM1	0.144371	9.41659e-07	pink	0.866228
TNFRSF1B	STAT3	0.218957	6.95241e-14	pink	1.31374
TNFRSF1B	DNMT1	0.220105	5.11238e-14	pink	1.32063
TNFRSF1B	CFLAR	0.13733	3.13205e-06	pink	0.823983
TNFRSF1B	AXL	0.287474	3.31238e-23	pink	1.72485
TNFRSF1B	STUB1	0.19821	1.34276e-11	pink	1.18926
TNFRSF1B	SIRT1	-0.124391	2.45311e-05	#6495ED	0.746344
TNFRSF1B	PLK1	0.149076	4.0837e-07	pink	0.894454
TNFRSF1B	BACH2	0.164589	2.15514e-08	pink	0.987537
TNFRSF1B	GATA3	0.346375	1.37173e-33	pink	2.07825
TNFRSF1B	SLC39A7	0.129486	1.11621e-05	pink	0.776918
TNFRSF1B	RNF31	0.143594	1.07829e-06	pink	0.861566
TNFRSF1B	IDH1	-0.213572	2.87438e-13	#6495ED	1.28143
TNFRSF1B	IDH2	0.168926	8.99208e-09	pink	1.01356
TNFRSF1B	CD40	0.386869	3.78784e-42	pink	2.32122
TNFRSF1B	BCL2L11	0.151934	2.42677e-07	pink	0.911605
TNFRSF1B	DDX58	0.218829	7.19521e-14	pink	1.31297
TNFRSF1B	APP	-0.149419	3.8386e-07	#6495ED	0.896511
TRAF2	OTULIN	0.187202	1.75578e-10	pink	1.12321
TRAF2	CYLD	-0.138703	2.48923e-06	#6495ED	0.832218
TRAF2	USP22	0.184301	3.37048e-10	pink	1.10581
TRAF2	MAP3K7	-0.19868	1.19892e-11	#6495ED	1.19208
TRAF2	SQSTM1	0.228899	4.58217e-15	pink	1.37339
TRAF2	DNMT1	0.373917	2.81976e-39	pink	2.2435
TRAF2	CFLAR	-0.116469	7.86453e-05	#6495ED	0.698816
TRAF2	CDKN2A	0.169638	7.77281e-09	pink	1.01783
TRAF2	STUB1	0.305271	4.23138e-26	pink	1.83162
TRAF2	SIRT2	0.198969	1.11826e-11	pink	1.19382
TRAF2	SIRT1	-0.277171	1.26864e-21	#6495ED	1.66303
TRAF2	PLK1	0.393978	8.83959e-44	pink	2.36387
TRAF2	MPG	0.219385	6.2015e-14	pink	1.31631
TRAF2	MYCN	0.197059	1.7694e-11	pink	1.18235
TRAF2	ATRX	-0.156918	9.56842e-08	#6495ED	0.941509
TRAF2	TERT	0.201764	5.66732e-12	pink	1.21058
TRAF2	SLC39A7	0.247133	2.22211e-17	pink	1.4828
TRAF2	SPATA2	0.256511	1.20348e-18	pink	1.53906
TRAF2	RNF31	0.224762	1.44341e-14	pink	1.34857
TRAF2	IDH1	-0.132739	6.64692e-06	#6495ED	0.796436
TRAF2	IDH2	0.19929	1.03487e-11	pink	1.19574
TRAF2	KLF9	-0.152672	2.11822e-07	#6495ED	0.916035
TRAF2	HDAC9	-0.217494	1.02627e-13	#6495ED	1.30496
PANX1	OTULIN	0.289685	1.48492e-23	pink	1.73811
PANX1	CYLD	0.353387	5.52206e-35	pink	2.12032
PANX1	MAP3K7	0.394585	6.3875e-44	pink	2.36751
PANX1	STAT3	0.237375	4.06725e-16	pink	1.42425
PANX1	DIABLO	0.156175	1.10131e-07	pink	0.937051
PANX1	DNMT1	0.296124	1.37762e-24	pink	1.77675
PANX1	CFLAR	0.13906	2.34409e-06	pink	0.834358
PANX1	BRAF	0.268349	2.5495e-20	pink	1.61009
PANX1	AXL	0.36886	3.43986e-38	pink	2.21316
PANX1	ID1	-0.223373	2.11082e-14	#6495ED	1.34024
PANX1	HSPA4	0.366281	1.21106e-37	pink	2.19769
PANX1	STUB1	-0.191847	6.04491e-11	#6495ED	1.15108
PANX1	HAT1	0.3837	1.96423e-41	pink	2.3022
PANX1	SIRT2	-0.187468	1.65303e-10	#6495ED	1.12481
PANX1	SIRT1	0.330756	1.31656e-30	pink	1.98454
PANX1	MPG	-0.162205	3.4514e-08	#6495ED	0.97323
PANX1	BACH2	0.277841	1.00567e-21	pink	1.66704
PANX1	GATA3	0.228743	4.78574e-15	pink	1.37246
PANX1	ATRX	0.279306	6.03557e-22	pink	1.67584
PANX1	TERT	-0.17014	7.01163e-09	#6495ED	1.02084
PANX1	SPATA2	-0.244458	4.99293e-17	#6495ED	1.46675
PANX1	KLF9	0.276697	1.49464e-21	pink	1.66018
PANX1	HDAC9	0.298796	5.04587e-25	pink	1.79277
PANX1	HSP90AA1	0.381262	6.87849e-41	pink	2.28757
PANX1	LEF1	0.241964	1.05323e-16	pink	1.45178
PANX1	BNIP3	0.228854	4.63999e-15	pink	1.37312
PANX1	CD40	0.220682	4.37739e-14	pink	1.32409
PANX1	BCL2L11	0.205757	2.10935e-12	pink	1.23454
PANX1	DDX58	0.390093	6.97049e-43	pink	2.34056
PANX1	TARDBP	0.244897	4.37506e-17	pink	1.46938
PANX1	TNFRSF21	0.197095	1.75435e-11	pink	1.18257
OTULIN	CYLD	0.180109	8.49371e-10	pink	1.08065
OTULIN	MAP3K7	0.274061	3.6995e-21	pink	1.64437
OTULIN	DIABLO	0.247229	2.15828e-17	pink	1.48337
OTULIN	DNMT1	0.357532	7.95338e-36	pink	2.14519
OTULIN	BRAF	0.311603	3.52449e-27	pink	1.86962
OTULIN	HSPA4	0.319571	1.41647e-28	pink	1.91743
OTULIN	HAT1	0.334801	2.30876e-31	pink	2.00881
OTULIN	SIRT1	0.211591	4.79989e-13	pink	1.26954
OTULIN	PLK1	0.278668	7.54037e-22	pink	1.67201
OTULIN	ATRX	0.171117	5.73254e-09	pink	1.0267
OTULIN	SPATA2	0.136952	3.33579e-06	pink	0.82171
OTULIN	HSP90AA1	0.246623	2.59509e-17	pink	1.47974
OTULIN	BNIP3	0.171351	5.46165e-09	pink	1.0281
OTULIN	BCL2L11	0.122434	3.29283e-05	pink	0.734606
OTULIN	DDX58	0.121142	3.99031e-05	pink	0.72685
OTULIN	TARDBP	0.262675	1.65725e-19	pink	1.57605
CYLD	MAP3K7	0.455084	1.46795e-59	pink	2.7305
CYLD	STAT3	0.280563	3.88519e-22	pink	1.68338
CYLD	CFLAR	0.461123	2.65753e-61	pink	2.76674
CYLD	BRAF	0.384492	1.30396e-41	pink	2.30695
CYLD	AXL	0.410374	1.06418e-47	pink	2.46225
CYLD	ID1	-0.246417	2.76252e-17	#6495ED	1.4785
CYLD	BCL2	0.337855	6.09819e-32	pink	2.02713
CYLD	STUB1	-0.149627	3.69684e-07	#6495ED	0.897759
CYLD	FLT3	0.137213	3.19366e-06	pink	0.823281
CYLD	HAT1	0.244065	5.62061e-17	pink	1.46439
CYLD	SIRT1	0.379593	1.61299e-40	pink	2.27756
CYLD	PLK1	-0.234248	1.00485e-15	#6495ED	1.40549
CYLD	MPG	-0.231976	1.92329e-15	#6495ED	1.39185
CYLD	BACH2	0.40879	2.60191e-47	pink	2.45274
CYLD	GATA3	0.398196	9.0999e-45	pink	2.38918
CYLD	MYCN	-0.262207	1.93016e-19	#6495ED	1.57324
CYLD	ATRX	0.342076	9.44256e-33	pink	2.05246
CYLD	TERT	-0.238415	3.00151e-16	#6495ED	1.43049
CYLD	SPATA2	-0.15018	3.34356e-07	#6495ED	0.901082
CYLD	RNF31	-0.120391	4.45722e-05	#6495ED	0.722347
CYLD	IDH2	-0.163005	2.94906e-08	#6495ED	0.978032
CYLD	KLF9	0.481211	2.35246e-67	pink	2.88726
CYLD	HDAC9	0.428097	3.44859e-52	pink	2.56858
CYLD	HSP90AA1	0.152079	2.36298e-07	pink	0.912475
CYLD	LEF1	0.129555	1.10426e-05	pink	0.777327
CYLD	CD40	0.344753	2.85062e-33	pink	2.06852
CYLD	BCL2L11	0.320267	1.06493e-28	pink	1.9216
CYLD	EGFR	0.11654	7.78528e-05	pink	0.699243
CYLD	DDX58	0.532309	1.05995e-84	pink	3.19385
CYLD	TARDBP	0.333547	3.97175e-31	pink	2.00128
CYLD	TNFRSF21	0.124211	2.52064e-05	pink	0.745269
USP22	SQSTM1	0.133301	6.0706e-06	pink	0.799805
USP22	STAT3	0.176053	2.03445e-09	pink	1.05632
USP22	DIABLO	0.178741	1.14297e-09	pink	1.07245
USP22	DNMT1	0.248323	1.5451e-17	pink	1.48994
USP22	BCL2	0.119715	4.92169e-05	pink	0.718291
USP22	PLK1	0.147351	5.56418e-07	pink	0.884106
USP22	MYCN	0.195536	2.5423e-11	pink	1.17322
USP22	ALK	0.135492	4.24562e-06	pink	0.812954
USP22	SLC39A7	0.18415	3.48657e-10	pink	1.1049
USP22	RNF31	0.230576	2.8594e-15	pink	1.38345
USP22	IDH2	0.132944	6.43107e-06	pink	0.797664
USP22	HSP90AA1	0.115703	8.76938e-05	pink	0.694219
USP22	APP	0.175574	2.2528e-09	pink	1.05344
MAP3K7	CFLAR	0.239961	1.90587e-16	pink	1.43977
MAP3K7	BRAF	0.497214	1.78684e-72	pink	2.98329
MAP3K7	HSPA4	0.295139	1.99028e-24	pink	1.77083
MAP3K7	STUB1	-0.310097	6.40231e-27	#6495ED	1.86058
MAP3K7	HAT1	0.465038	1.88981e-62	pink	2.79023
MAP3K7	SIRT1	0.477901	2.49324e-66	pink	2.86741
MAP3K7	PLK1	-0.166216	1.557e-08	#6495ED	0.997294
MAP3K7	MPG	-0.308555	1.17484e-26	#6495ED	1.85133
MAP3K7	BACH2	0.171278	5.54415e-09	pink	1.02767
MAP3K7	MYCN	-0.146918	6.01017e-07	#6495ED	0.881508
MAP3K7	ATRX	0.538469	5.33772e-87	pink	3.23081
MAP3K7	TERT	-0.136506	3.59185e-06	#6495ED	0.819034
MAP3K7	RNF31	-0.143419	1.11173e-06	#6495ED	0.860512
MAP3K7	IDH1	0.122491	3.26489e-05	pink	0.734948
MAP3K7	IDH2	-0.232513	1.65048e-15	#6495ED	1.39508
MAP3K7	KLF9	0.228583	5.00546e-15	pink	1.3715
MAP3K7	HDAC9	0.227813	6.20621e-15	pink	1.36688
MAP3K7	HSP90AA1	0.342969	6.34168e-33	pink	2.05781
MAP3K7	LEF1	0.137241	3.17927e-06	pink	0.823444
MAP3K7	BNIP3	0.143925	1.01791e-06	pink	0.863552
MAP3K7	BCL2L11	0.209042	9.21403e-13	pink	1.25425
MAP3K7	DDX58	0.262451	1.78277e-19	pink	1.5747
MAP3K7	TARDBP	0.489877	4.29621e-70	pink	2.93926
MAP3K7	TNFRSF21	0.166616	1.43662e-08	pink	0.999695
SQSTM1	STAT3	0.206156	1.90925e-12	pink	1.23693
SQSTM1	CFLAR	0.12414	2.54809e-05	pink	0.744839
SQSTM1	STUB1	0.220204	4.97925e-14	pink	1.32122
SQSTM1	HAT1	-0.159294	6.07586e-08	#6495ED	0.955766
SQSTM1	SIRT2	0.3534	5.48752e-35	pink	2.1204
SQSTM1	MPG	0.234611	9.05268e-16	pink	1.40767
SQSTM1	SPATA2	0.128734	1.25621e-05	pink	0.772403
SQSTM1	RNF31	0.242533	8.89064e-17	pink	1.4552
SQSTM1	EGFR	0.120917	4.12479e-05	pink	0.725504
STAT3	CFLAR	0.328563	3.34644e-30	pink	1.97138
STAT3	AXL	0.273348	4.71968e-21	pink	1.64009
STAT3	BCL2	0.202186	5.11004e-12	pink	1.21312
STAT3	SIRT2	0.122335	3.34209e-05	pink	0.734009
STAT3	BACH2	0.185326	2.67987e-10	pink	1.11196
STAT3	GATA3	0.12909	1.18795e-05	pink	0.774541
STAT3	SLC39A7	0.249841	9.69339e-18	pink	1.49904
STAT3	RNF31	0.150319	3.2602e-07	pink	0.901916
STAT3	KLF9	0.308541	1.18142e-26	pink	1.85124
STAT3	HDAC9	0.147138	5.7794e-07	pink	0.882828
STAT3	BNIP3	0.140064	1.97776e-06	pink	0.840385
STAT3	CD40	0.274053	3.71003e-21	pink	1.64432
STAT3	BCL2L11	0.199293	1.03412e-11	pink	1.19576
STAT3	DDX58	0.225532	1.16761e-14	pink	1.35319
STAT3	APP	0.194421	3.30911e-11	pink	1.16653
STAT3	TNFRSF21	0.181242	6.63041e-10	pink	1.08745
DIABLO	DNMT1	0.264736	8.44043e-20	pink	1.58842
DIABLO	HSPA4	0.202891	4.2963e-12	pink	1.21735
DIABLO	HAT1	0.144824	8.69917e-07	pink	0.868944
DIABLO	SIRT1	0.132516	6.89091e-06	pink	0.795094
DIABLO	PLK1	0.197509	1.58892e-11	pink	1.18505
DIABLO	IDH2	0.181689	6.01019e-10	pink	1.09014
DIABLO	HSP90AA1	0.182702	4.80824e-10	pink	1.09621
DIABLO	TARDBP	0.166462	1.48173e-08	pink	0.998773
DNMT1	CFLAR	-0.116279	8.08086e-05	#6495ED	0.697674
DNMT1	ID1	-0.11652	7.8085e-05	#6495ED	0.699117
DNMT1	HSPA4	0.269937	1.49793e-20	pink	1.61962
DNMT1	HAT1	0.213981	2.58444e-13	pink	1.28388
DNMT1	PLK1	0.595935	6.34481e-111	pink	3.57561
DNMT1	GATA3	0.156373	1.06098e-07	pink	0.938236
DNMT1	MYCN	0.149227	3.97395e-07	pink	0.89536
DNMT1	TERT	0.160926	4.43054e-08	pink	0.965557
DNMT1	SLC39A7	0.155045	1.36216e-07	pink	0.930273
DNMT1	SPATA2	0.132588	6.8115e-06	pink	0.795526
DNMT1	RNF31	0.171952	4.82146e-09	pink	1.03171
DNMT1	IDH2	0.23981	1.99281e-16	pink	1.43886
DNMT1	KLF9	-0.150683	3.05156e-07	#6495ED	0.904095
DNMT1	HDAC9	-0.12352	2.79795e-05	#6495ED	0.741121
DNMT1	HSP90AA1	0.309523	8.02709e-27	pink	1.85714
DNMT1	CD40	0.142225	1.36676e-06	pink	0.853349
DNMT1	TARDBP	0.287746	3.00259e-23	pink	1.72648
CFLAR	BRAF	0.234032	1.06928e-15	pink	1.40419
CFLAR	AXL	0.300232	2.92721e-25	pink	1.80139
CFLAR	BCL2	0.232989	1.44124e-15	pink	1.39793
CFLAR	STUB1	-0.197394	1.63309e-11	#6495ED	1.18436
CFLAR	FLT3	0.225934	1.04503e-14	pink	1.35561
CFLAR	SIRT2	0.153849	1.70311e-07	pink	0.923096
CFLAR	SIRT1	0.179539	9.61523e-10	pink	1.07723
CFLAR	PLK1	-0.280643	3.77767e-22	#6495ED	1.68386
CFLAR	MPG	-0.209711	7.77092e-13	#6495ED	1.25827
CFLAR	BACH2	0.287374	3.43399e-23	pink	1.72425
CFLAR	GATA3	0.223919	1.81852e-14	pink	1.34351
CFLAR	MYCN	-0.195526	2.54876e-11	#6495ED	1.17315
CFLAR	ATRX	0.272636	6.01517e-21	pink	1.63581
CFLAR	IDH2	-0.164725	2.09783e-08	#6495ED	0.98835
CFLAR	KLF9	0.357967	6.47945e-36	pink	2.1478
CFLAR	HDAC9	0.386774	3.98208e-42	pink	2.32064
CFLAR	CD40	0.201898	5.48371e-12	pink	1.21139
CFLAR	BCL2L11	0.338684	4.23758e-32	pink	2.0321
CFLAR	EGFR	0.336056	1.33857e-31	pink	2.01633
CFLAR	DDX58	0.364794	2.48888e-37	pink	2.18877
CFLAR	APP	0.190403	8.44482e-11	pink	1.14242
CFLAR	TNFRSF21	0.258223	6.97461e-19	pink	1.54934
BRAF	HSPA4	0.237981	3.40773e-16	pink	1.42789
BRAF	STUB1	-0.21271	3.59491e-13	#6495ED	1.27626
BRAF	HAT1	0.312138	2.84956e-27	pink	1.87283
BRAF	SIRT1	0.441386	9.79815e-56	pink	2.64831
BRAF	PLK1	-0.160011	5.29149e-08	#6495ED	0.960063
BRAF	MPG	-0.307173	2.01842e-26	#6495ED	1.84304
BRAF	BACH2	0.169145	8.59844e-09	pink	1.01487
BRAF	MYCN	-0.158867	6.59657e-08	#6495ED	0.9532
BRAF	ATRX	0.534096	2.30871e-85	pink	3.20458
BRAF	TERT	-0.142268	1.35658e-06	#6495ED	0.853609
BRAF	SPATA2	0.131977	7.51389e-06	pink	0.791861
BRAF	RNF31	-0.209456	8.29315e-13	#6495ED	1.25674
BRAF	IDH1	0.122296	3.36177e-05	pink	0.733773
BRAF	IDH2	-0.12859	1.28484e-05	#6495ED	0.771539
BRAF	KLF9	0.146703	6.24475e-07	pink	0.880215
BRAF	HDAC9	0.127443	1.53616e-05	pink	0.764658
BRAF	HSP90AA1	0.296328	1.27671e-24	pink	1.77797
BRAF	BNIP3	0.118477	5.89325e-05	pink	0.710864
BRAF	BCL2L11	0.201253	6.42198e-12	pink	1.20752
BRAF	EGFR	0.268761	2.22157e-20	pink	1.61257
BRAF	DDX58	0.162258	3.41579e-08	pink	0.973547
BRAF	TARDBP	0.436785	1.72498e-54	pink	2.62071
BRAF	TNFRSF21	0.141115	1.65366e-06	pink	0.846688
AXL	ID1	-0.269947	1.49274e-20	#6495ED	1.61968
AXL	CDKN2A	0.164245	2.30798e-08	pink	0.985468
AXL	HSPA4	-0.119525	5.06034e-05	#6495ED	0.71715
AXL	BCL2	0.160254	5.04796e-08	pink	0.961524
AXL	PLK1	-0.160485	4.82645e-08	#6495ED	0.962913
AXL	BACH2	0.496845	2.36309e-72	pink	2.98107
AXL	GATA3	0.445293	8.28007e-57	pink	2.67176
AXL	MYCN	-0.196381	2.07996e-11	#6495ED	1.17829
AXL	TERT	-0.169779	7.55247e-09	#6495ED	1.01867
AXL	SPATA2	-0.211059	5.50368e-13	#6495ED	1.26635
AXL	IDH1	-0.280189	4.43112e-22	#6495ED	1.68113
AXL	IDH2	-0.15318	1.92849e-07	#6495ED	0.919079
AXL	KLF9	0.413854	1.46816e-48	pink	2.48312
AXL	HDAC9	0.465553	1.33085e-62	pink	2.79332
AXL	LEF1	0.33373	3.67012e-31	pink	2.00238
AXL	BNIP3	0.158751	6.74467e-08	pink	0.952506
AXL	CD40	0.427728	4.30328e-52	pink	2.56637
AXL	BCL2L11	0.208592	1.03302e-12	pink	1.25155
AXL	DDX58	0.345127	2.40916e-33	pink	2.07076
ID1	BCL2	-0.171775	5.00155e-09	#6495ED	1.03065
ID1	BACH2	-0.224967	1.3644e-14	#6495ED	1.3498
ID1	GATA3	-0.141123	1.65122e-06	#6495ED	0.84674
ID1	SPATA2	0.358384	5.3227e-36	pink	2.1503
ID1	KLF9	-0.292204	5.90067e-24	#6495ED	1.75322
ID1	HDAC9	-0.116256	8.10672e-05	#6495ED	0.697539
ID1	HSP90AA1	-0.156205	1.09512e-07	#6495ED	0.937231
ID1	CD40	-0.185276	2.71028e-10	#6495ED	1.11166
ID1	BCL2L11	-0.17916	1.04376e-09	#6495ED	1.07496
ID1	DDX58	-0.211472	4.94891e-13	#6495ED	1.26883
CDKN2A	SIRT1	-0.155605	1.22621e-07	#6495ED	0.933632
CDKN2A	MPG	0.126309	1.83029e-05	pink	0.757852
CDKN2A	BACH2	0.152975	2.0032e-07	pink	0.917847
CDKN2A	GATA3	0.194683	3.11066e-11	pink	1.1681
CDKN2A	ATRX	-0.123681	2.73104e-05	#6495ED	0.742085
CDKN2A	RNF31	0.130081	1.01627e-05	pink	0.780484
CDKN2A	IDH1	-0.157628	8.36068e-08	#6495ED	0.945767
CDKN2A	LEF1	0.197548	1.57393e-11	pink	1.18529
CDKN2A	TARDBP	-0.16379	2.52592e-08	#6495ED	0.982737
CDKN2A	APP	-0.158906	6.54722e-08	#6495ED	0.953435
HSPA4	STUB1	-0.151249	2.75177e-07	#6495ED	0.907493
HSPA4	HAT1	0.462639	9.58938e-62	pink	2.77583
HSPA4	SIRT2	-0.192589	5.08497e-11	#6495ED	1.15554
HSPA4	SIRT1	0.296285	1.29696e-24	pink	1.77771
HSPA4	PLK1	0.152996	1.9952e-07	pink	0.917977
HSPA4	MPG	-0.129105	1.18523e-05	#6495ED	0.774628
HSPA4	ATRX	0.221724	3.30428e-14	pink	1.33034
HSPA4	IDH1	0.258888	5.6377e-19	pink	1.55333
HSPA4	HSP90AA1	0.433379	1.40221e-53	pink	2.60027
HSPA4	DDX58	0.176983	1.66805e-09	pink	1.0619
HSPA4	TARDBP	0.238942	2.57226e-16	pink	1.43365
HSPA4	TNFRSF21	0.162101	3.52245e-08	pink	0.972606
BCL2	FLT3	0.201536	5.99307e-12	pink	1.20921
BCL2	SIRT1	0.194268	3.43099e-11	pink	1.16561
BCL2	PLK1	-0.157219	9.03678e-08	#6495ED	0.943316
BCL2	BACH2	0.214427	2.30013e-13	pink	1.28656
BCL2	GATA3	0.16308	2.9059e-08	pink	0.978481
BCL2	MYCN	0.15459	1.48346e-07	pink	0.927538
BCL2	SLC39A7	0.116415	7.92614e-05	pink	0.698488
BCL2	SPATA2	-0.171294	5.52593e-09	#6495ED	1.02777
BCL2	RNF31	0.143519	1.09244e-06	pink	0.861116
BCL2	KLF9	0.305994	3.19528e-26	pink	1.83596
BCL2	HDAC9	0.150783	2.99599e-07	pink	0.9047
BCL2	CD40	0.149365	3.87596e-07	pink	0.896189
BCL2	BCL2L11	0.184538	3.19747e-10	pink	1.10723
BCL2	EGFR	0.180959	7.05439e-10	pink	1.08575
BCL2	DDX58	0.211487	4.93019e-13	pink	1.26892
STUB1	HAT1	-0.229133	4.29138e-15	#6495ED	1.3748
STUB1	SIRT2	0.182894	4.60791e-10	pink	1.09736
STUB1	SIRT1	-0.275125	2.56902e-21	#6495ED	1.65075
STUB1	PLK1	0.348156	6.11302e-34	pink	2.08893
STUB1	MPG	0.561072	7.48547e-96	pink	3.36643
STUB1	ATRX	-0.338997	3.6916e-32	#6495ED	2.03398
STUB1	TERT	0.14414	9.8052e-07	pink	0.864839
STUB1	SLC39A7	0.114859	9.87915e-05	pink	0.689156
STUB1	IDH2	0.201042	6.7614e-12	pink	1.20625
STUB1	KLF9	-0.126739	1.71301e-05	#6495ED	0.760431
STUB1	HDAC9	-0.153348	1.86917e-07	#6495ED	0.92009
STUB1	HSP90AA1	-0.127475	1.52853e-05	#6495ED	0.76485
STUB1	BCL2L11	-0.130699	9.21432e-06	#6495ED	0.784192
STUB1	DDX58	-0.147745	5.18581e-07	#6495ED	0.886472
STUB1	TARDBP	-0.147627	5.29703e-07	#6495ED	0.88576
FLT3	BACH2	0.171682	5.09935e-09	pink	1.03009
FLT3	GATA3	0.149344	3.89086e-07	pink	0.896062
FLT3	RNF31	0.147227	5.68876e-07	pink	0.88336
FLT3	HDAC9	0.119992	4.72592e-05	pink	0.719954
FLT3	BCL2L11	0.160439	4.87015e-08	pink	0.962634
FLT3	EGFR	0.276469	1.61708e-21	pink	1.65882
HAT1	SIRT2	-0.201494	6.05401e-12	#6495ED	1.20897
HAT1	SIRT1	0.366309	1.19498e-37	pink	2.19785
HAT1	PLK1	0.178153	1.29746e-09	pink	1.06892
HAT1	MPG	-0.142457	1.31309e-06	#6495ED	0.854743
HAT1	ATRX	0.334665	2.44953e-31	pink	2.00799
HAT1	IDH1	0.305733	3.53604e-26	pink	1.8344
HAT1	HSP90AA1	0.530594	4.53492e-84	pink	3.18356
HAT1	BCL2L11	0.152938	2.01684e-07	pink	0.917627
HAT1	DDX58	0.224041	1.75868e-14	pink	1.34425
HAT1	TARDBP	0.38433	1.41809e-41	pink	2.30598
SIRT2	SIRT1	-0.1271	1.61996e-05	#6495ED	0.7626
SIRT2	MPG	0.143557	1.08535e-06	pink	0.861341
SIRT2	MYCN	0.131694	7.86173e-06	pink	0.790166
SIRT2	SPATA2	0.267416	3.47931e-20	pink	1.6045
SIRT2	RNF31	0.168641	9.53181e-09	pink	1.01184
SIRT2	HSP90AA1	-0.132012	7.47185e-06	#6495ED	0.792071
SIRT2	EGFR	0.243177	7.33476e-17	pink	1.45906
SIRT2	APP	0.172164	4.61261e-09	pink	1.03299
SIRT1	PLK1	-0.202034	5.30444e-12	#6495ED	1.2122
SIRT1	MPG	-0.308889	1.03017e-26	#6495ED	1.85334
SIRT1	BACH2	0.130263	9.87381e-06	pink	0.781577
SIRT1	MYCN	-0.150721	3.03031e-07	#6495ED	0.904325
SIRT1	ATRX	0.447342	2.23683e-57	pink	2.68405
SIRT1	RNF31	-0.130316	9.79047e-06	#6495ED	0.781898
SIRT1	IDH1	0.173261	3.66906e-09	pink	1.03956
SIRT1	IDH2	-0.117698	6.59513e-05	#6495ED	0.706189
SIRT1	KLF9	0.225188	1.28374e-14	pink	1.35113
SIRT1	HDAC9	0.21527	1.84508e-13	pink	1.29162
SIRT1	HSP90AA1	0.275034	2.65137e-21	pink	1.6502
SIRT1	BNIP3	0.154576	1.4872e-07	pink	0.927457
SIRT1	BCL2L11	0.251556	5.70109e-18	pink	1.50934
SIRT1	EGFR	0.154365	1.54709e-07	pink	0.926189
SIRT1	DDX58	0.241702	1.13857e-16	pink	1.45021
SIRT1	TARDBP	0.371842	7.91189e-39	pink	2.23105
SIRT1	APP	0.144861	8.64327e-07	pink	0.869164
SIRT1	TNFRSF21	0.165563	1.77455e-08	pink	0.99338
PLK1	MPG	0.234061	1.06051e-15	pink	1.40436
PLK1	BACH2	-0.238222	3.17623e-16	#6495ED	1.42933
PLK1	MYCN	0.187999	1.46502e-10	pink	1.12799
PLK1	ATRX	-0.194957	2.91594e-11	#6495ED	1.16974
PLK1	TERT	0.217934	9.13033e-14	pink	1.30761
PLK1	SLC39A7	0.213239	3.13432e-13	pink	1.27943
PLK1	SPATA2	0.184739	3.05641e-10	pink	1.10844
PLK1	RNF31	0.17824	1.27348e-09	pink	1.06944
PLK1	IDH2	0.364046	3.57162e-37	pink	2.18428
PLK1	KLF9	-0.327103	6.19908e-30	#6495ED	1.96262
PLK1	HDAC9	-0.278846	7.08616e-22	#6495ED	1.67308
PLK1	HSP90AA1	0.158039	7.73041e-08	pink	0.948232
PLK1	DDX58	-0.131744	7.79892e-06	#6495ED	0.790467
PLK1	APP	-0.239486	2.1922e-16	#6495ED	1.43692
MPG	BACH2	-0.121733	3.65522e-05	#6495ED	0.7304
MPG	ATRX	-0.292392	5.50682e-24	#6495ED	1.75435
MPG	TERT	0.119544	5.04649e-05	pink	0.717263
MPG	RNF31	0.133816	5.58355e-06	pink	0.802899
MPG	KLF9	-0.160717	4.61441e-08	#6495ED	0.964301
MPG	HDAC9	-0.166808	1.38208e-08	#6495ED	1.00085
MPG	BCL2L11	-0.208223	1.1344e-12	#6495ED	1.24934
MPG	DDX58	-0.158525	7.04313e-08	#6495ED	0.951152
MPG	TARDBP	-0.309015	9.80675e-27	#6495ED	1.85409
MPG	TNFRSF21	-0.115433	9.11185e-05	#6495ED	0.692595
BACH2	GATA3	0.425127	2.03573e-51	pink	2.55076
BACH2	MYCN	-0.16755	1.18963e-08	#6495ED	1.0053
BACH2	ATRX	0.128028	1.40262e-05	pink	0.768168
BACH2	TERT	-0.167872	1.11439e-08	#6495ED	1.00723
BACH2	SPATA2	-0.167013	1.326e-08	#6495ED	1.00208
BACH2	IDH1	-0.223221	2.2005e-14	#6495ED	1.33932
BACH2	IDH2	-0.185634	2.50123e-10	#6495ED	1.1138
BACH2	KLF9	0.395145	4.72825e-44	pink	2.37087
BACH2	HDAC9	0.458996	1.10164e-60	pink	2.75398
BACH2	LEF1	0.29685	1.04986e-24	pink	1.7811
BACH2	CD40	0.266624	4.52568e-20	pink	1.59974
BACH2	BCL2L11	0.235023	8.04127e-16	pink	1.41014
BACH2	DDX58	0.306582	2.54162e-26	pink	1.83949
GATA3	MYCN	-0.151977	2.40783e-07	#6495ED	0.911861
GATA3	TERT	-0.163422	2.71648e-08	#6495ED	0.98053
GATA3	SPATA2	-0.153448	1.83489e-07	#6495ED	0.920689
GATA3	IDH1	-0.202344	4.91584e-12	#6495ED	1.21406
GATA3	KLF9	0.185509	2.57221e-10	pink	1.11306
GATA3	HDAC9	0.332513	6.20047e-31	pink	1.99508
GATA3	LEF1	0.235842	6.34803e-16	pink	1.41505
GATA3	CD40	0.424731	2.57663e-51	pink	2.54838
GATA3	BCL2L11	0.265446	6.68145e-20	pink	1.59267
GATA3	DDX58	0.347486	8.28767e-34	pink	2.08492
MYCN	TERT	0.221589	3.42757e-14	pink	1.32953
MYCN	RNF31	0.291751	6.971e-24	pink	1.75051
MYCN	IDH1	0.165757	1.70712e-08	pink	0.994541
MYCN	IDH2	0.172477	4.32162e-09	pink	1.03486
MYCN	KLF9	-0.186239	2.18265e-10	#6495ED	1.11743
MYCN	HDAC9	-0.21855	7.75059e-14	#6495ED	1.3113
MYCN	LEF1	0.133993	5.42525e-06	pink	0.80396
MYCN	CD40	-0.134709	4.82753e-06	#6495ED	0.808254
MYCN	DDX58	-0.182942	4.55929e-10	#6495ED	1.09765
ALK	SLC39A7	0.134158	5.28188e-06	pink	0.804947
ALK	KLF9	0.132322	7.10862e-06	pink	0.793933
ALK	BCL2L11	0.126991	1.64746e-05	pink	0.761947
ATRX	SLC39A7	-0.201907	5.47239e-12	#6495ED	1.21144
ATRX	SPATA2	0.133965	5.45e-06	pink	0.803792
ATRX	IDH2	-0.147863	5.07796e-07	#6495ED	0.887177
ATRX	HDAC9	0.171879	4.89467e-09	pink	1.03127
ATRX	HSP90AA1	0.329129	2.63196e-30	pink	1.97477
ATRX	LEF1	0.159289	6.08205e-08	pink	0.955734
ATRX	BNIP3	0.156364	1.06269e-07	pink	0.938185
ATRX	EGFR	0.211329	5.13458e-13	pink	1.26797
ATRX	DDX58	0.144034	9.98781e-07	pink	0.864205
ATRX	TARDBP	0.448744	9.09159e-58	pink	2.69246
ATRX	APP	0.190739	7.81508e-11	pink	1.14443
TERT	SPATA2	0.141325	1.59518e-06	pink	0.84795
TERT	RNF31	0.29599	1.44871e-24	pink	1.77594
TERT	KLF9	-0.161338	4.08927e-08	#6495ED	0.968026
TERT	HDAC9	-0.19785	1.464e-11	#6495ED	1.1871
TERT	DDX58	-0.12679	1.69936e-05	#6495ED	0.760743
SLC39A7	RNF31	0.142846	1.22775e-06	pink	0.857076
SLC39A7	IDH2	0.139835	2.05623e-06	pink	0.839009
SLC39A7	KLF9	0.1961	2.22371e-11	pink	1.1766
SLC39A7	TARDBP	0.119304	5.22588e-05	pink	0.715827
SLC39A7	APP	0.128534	1.29617e-05	pink	0.771202
SLC39A7	TNFRSF21	0.227337	7.08443e-15	pink	1.36402
SPATA2	KLF9	-0.274166	3.56946e-21	#6495ED	1.645
SPATA2	HDAC9	-0.258841	5.72369e-19	#6495ED	1.55304
SPATA2	HSP90AA1	-0.162753	3.09917e-08	#6495ED	0.976519
SPATA2	CD40	-0.131795	7.73667e-06	#6495ED	0.790767
SPATA2	EGFR	0.20457	2.8358e-12	pink	1.22742
SPATA2	DDX58	-0.247299	2.11248e-17	#6495ED	1.48379
SPATA2	TARDBP	0.15293	2.01977e-07	pink	0.91758
RNF31	HSP90AA1	0.118397	5.96204e-05	pink	0.710384
RNF31	CD40	0.124634	2.36409e-05	pink	0.747806
RNF31	BCL2L11	0.145944	7.14222e-07	pink	0.875666
RNF31	EGFR	0.222516	2.66561e-14	pink	1.3351
IDH1	IDH2	0.137164	3.22033e-06	pink	0.822981
IDH1	HDAC9	-0.153893	1.68938e-07	#6495ED	0.923357
IDH1	HSP90AA1	0.218197	8.51375e-14	pink	1.30918
IDH1	LEF1	-0.127512	1.51984e-05	#6495ED	0.765071
IDH1	CD40	-0.191166	7.07978e-11	#6495ED	1.147
IDH1	EGFR	0.121797	3.6211e-05	pink	0.730779
IDH1	TARDBP	0.157425	8.68985e-08	pink	0.944551
IDH1	APP	0.194883	2.96752e-11	pink	1.1693
IDH1	TNFRSF21	0.143772	1.04554e-06	pink	0.862629
IDH2	KLF9	-0.117011	7.27904e-05	#6495ED	0.702065
IDH2	HDAC9	-0.226596	8.7018e-15	#6495ED	1.35958
IDH2	BCL2L11	-0.181371	6.4454e-10	#6495ED	1.08823
IDH2	EGFR	-0.14835	4.65349e-07	#6495ED	0.890099
IDH2	DDX58	-0.168017	1.08209e-08	#6495ED	1.0081
IDH2	APP	-0.131438	8.19006e-06	#6495ED	0.788631
KLF9	HDAC9	0.384139	1.56565e-41	pink	2.30483
KLF9	CD40	0.176876	1.70675e-09	pink	1.06126
KLF9	BCL2L11	0.315628	7.03733e-28	pink	1.89377
KLF9	DDX58	0.343831	4.31112e-33	pink	2.06299
KLF9	APP	0.163153	2.86418e-08	pink	0.978921
KLF9	TNFRSF21	0.262969	1.50561e-19	pink	1.57781
HDAC9	LEF1	0.131191	8.51985e-06	pink	0.787146
HDAC9	CD40	0.184075	3.54492e-10	pink	1.10445
HDAC9	BCL2L11	0.300011	3.18438e-25	pink	1.80006
HDAC9	EGFR	0.168093	1.06554e-08	pink	1.00856
HDAC9	DDX58	0.401145	1.82038e-45	pink	2.40687
HDAC9	TNFRSF21	0.233321	1.31074e-15	pink	1.39993
HSP90AA1	DDX58	0.177901	1.37001e-09	pink	1.0674
HSP90AA1	TARDBP	0.34491	2.65598e-33	pink	2.06946
BNIP3	CD40	0.183361	4.15439e-10	pink	1.10017
CD40	BCL2L11	0.212588	3.71029e-13	pink	1.27553
CD40	DDX58	0.307979	1.47274e-26	pink	1.84787
BCL2L11	EGFR	0.157096	9.25146e-08	pink	0.942574
BCL2L11	DDX58	0.333712	3.69932e-31	pink	2.00227
BCL2L11	TARDBP	0.153189	1.92534e-07	pink	0.919132
BCL2L11	TNFRSF21	0.264751	8.3974e-20	pink	1.58851
EGFR	APP	0.161785	3.74723e-08	pink	0.97071
EGFR	TNFRSF21	0.20753	1.35147e-12	pink	1.24518
DDX58	TARDBP	0.187478	1.6492e-10	pink	1.12487
DDX58	TNFRSF21	0.137129	3.23871e-06	pink	0.822776
APP	TNFRSF21	0.149126	4.04708e-07	pink	0.894754

## Sheet: S5
Table S5: The activation states of biological pathways in distinct necroptosis subtype by GSVA enrichment analysis
Pathway	logFC	AveExpr	t	P.Value	adj.P.Val	B
KEGG_TOLL_LIKE_RECEPTOR_SIGNALING_PATHWAY	-0.213566	0.00199377	-18.4374	1.03632e-66	1.90682e-64	141.031
KEGG_VIRAL_MYOCARDITIS	-0.256973	-0.00197307	-18.1142	1.02215e-64	9.40381e-63	136.47
KEGG_B_CELL_RECEPTOR_SIGNALING_PATHWAY	-0.199255	-0.00144922	-17.6908	3.9126e-62	2.39973e-60	130.563
KEGG_NATURAL_KILLER_CELL_MEDIATED_CYTOTOXICITY	-0.2067	-0.00521082	-17.4152	1.79993e-60	8.2797e-59	126.761
KEGG_LEISHMANIA_INFECTION	-0.276356	7.44672e-05	-17.1185	1.06679e-58	3.92579e-57	122.707
KEGG_CHEMOKINE_SIGNALING_PATHWAY	-0.194744	-0.000612421	-17.0165	4.29797e-58	1.31804e-56	121.323
KEGG_FC_GAMMA_R_MEDIATED_PHAGOCYTOSIS	-0.175357	-0.00178435	-17.0007	5.33162e-58	1.40146e-56	121.109
KEGG_FOCAL_ADHESION	-0.205016	-0.00554433	-16.5587	2.10664e-55	4.84527e-54	115.172
KEGG_LEUKOCYTE_TRANSENDOTHELIAL_MIGRATION	-0.185507	0.00117821	-16.3208	5.05936e-54	1.03436e-52	112.016
KEGG_SYSTEMIC_LUPUS_ERYTHEMATOSUS	-0.283631	-0.00453564	-16.3086	5.95256e-54	1.09527e-52	111.854
KEGG_RENAL_CELL_CARCINOMA	-0.179911	-0.000420204	-16.1964	2.63697e-53	4.41093e-52	110.377
KEGG_CELL_ADHESION_MOLECULES_CAMS	-0.229634	0.00150397	-16.0068	3.21702e-52	4.93277e-51	107.894
KEGG_PANCREATIC_CANCER	-0.154441	0.00134713	-15.7392	1.06422e-50	1.50627e-49	104.421
KEGG_REGULATION_OF_ACTIN_CYTOSKELETON	-0.139632	-0.00340825	-15.4801	3.0344e-49	3.98807e-48	101.095
KEGG_HEMATOPOIETIC_CELL_LINEAGE	-0.239169	8.95267e-05	-15.1967	1.13865e-47	1.39674e-46	97.4977
KEGG_ANTIGEN_PROCESSING_AND_PRESENTATION	-0.240595	-0.00776034	-15.1743	1.51246e-47	1.73933e-46	97.216
KEGG_GRAFT_VERSUS_HOST_DISEASE	-0.330159	-0.00701528	-14.9596	2.28301e-46	2.47102e-45	94.5226
KEGG_T_CELL_RECEPTOR_SIGNALING_PATHWAY	-0.164029	-0.00048034	-14.8817	6.06952e-46	6.2044e-45	93.5524
KEGG_APOPTOSIS	-0.145319	0.000859818	-14.5166	5.67802e-44	5.49871e-43	89.0498
KEGG_ECM_RECEPTOR_INTERACTION	-0.238012	-0.00800529	-14.2799	1.03439e-42	9.51641e-42	86.1708
KEGG_JAK_STAT_SIGNALING_PATHWAY	-0.139184	-0.000353164	-14.2256	2.00244e-42	1.75452e-41	85.5156
KEGG_ALLOGRAFT_REJECTION	-0.311784	-0.00752703	-14.1047	8.66507e-42	7.24715e-41	84.0627
KEGG_INTESTINAL_IMMUNE_NETWORK_FOR_IGA_PRODUCTION	-0.266621	-0.00164092	-13.964	4.71732e-41	3.77385e-40	82.3822
KEGG_FC_EPSILON_RI_SIGNALING_PATHWAY	-0.128974	-0.001566	-13.8238	2.52339e-40	1.9346e-39	80.7193
KEGG_NOD_LIKE_RECEPTOR_SIGNALING_PATHWAY	-0.173446	0.00235786	-13.6295	2.52788e-39	1.86052e-38	78.4344
KEGG_PATHWAYS_IN_CANCER	-0.105713	-0.000883601	-13.4877	1.33738e-38	9.46456e-38	76.7828
KEGG_PRION_DISEASES	-0.162422	-5.01442e-06	-13.4324	2.55499e-38	1.74118e-37	76.1411
KEGG_TYPE_I_DIABETES_MELLITUS	-0.251238	-0.00437366	-13.3177	9.7104e-38	6.16108e-37	74.8176
KEGG_CYTOKINE_CYTOKINE_RECEPTOR_INTERACTION	-0.161904	0.00150343	-12.9155	9.81172e-36	6.01786e-35	70.2431
KEGG_RIG_I_LIKE_RECEPTOR_SIGNALING_PATHWAY	-0.127967	-0.00173905	-12.7582	5.8004e-35	3.44282e-34	68.4824
KEGG_SMALL_CELL_LUNG_CANCER	-0.121626	-0.000498293	-12.4096	2.8076e-33	1.61437e-32	64.6391
KEGG_AMINOACYL_TRNA_BIOSYNTHESIS	0.235797	0.012683	12.3902	3.47659e-33	1.93846e-32	64.4274
KEGG_ASTHMA	-0.246058	-0.000836682	-12.3638	4.64473e-33	2.51362e-32	64.1405
KEGG_AUTOIMMUNE_THYROID_DISEASE	-0.224442	-9.04492e-05	-12.2651	1.36954e-32	7.19985e-32	63.0696
KEGG_PROSTATE_CANCER	-0.106889	0.000148605	-12.1402	5.32742e-32	2.7229e-31	61.7243
KEGG_RNA_POLYMERASE	0.201647	0.00155987	12.1375	5.48267e-32	2.72652e-31	61.6959
KEGG_GLYCOSPHINGOLIPID_BIOSYNTHESIS_GANGLIO_SERIES	-0.180396	0.00409168	-11.7203	4.7441e-30	2.29714e-29	57.2799
KEGG_SELENOAMINO_ACID_METABOLISM	0.148327	0.00259125	11.6096	1.51797e-29	7.16169e-29	56.1288
KEGG_VEGF_SIGNALING_PATHWAY	-0.100921	-0.002461	-11.3746	1.74155e-28	8.01113e-28	53.7144
KEGG_INOSITOL_PHOSPHATE_METABOLISM	-0.119142	-0.00291016	-11.3495	2.25468e-28	1.01186e-27	53.4589
KEGG_GLYCOSAMINOGLYCAN_BIOSYNTHESIS_CHONDROITIN_SULFATE	-0.20379	-0.0106892	-11.3115	3.33137e-28	1.45946e-27	53.0727
KEGG_MATURITY_ONSET_DIABETES_OF_THE_YOUNG	0.166672	0.00836059	11.2886	4.21502e-28	1.80364e-27	52.8399
KEGG_LYSOSOME	-0.136719	-0.00527055	-11.2289	7.75472e-28	3.24288e-27	52.2368
KEGG_BASE_EXCISION_REPAIR	0.177998	0.00351957	11.0338	5.59806e-27	2.28898e-26	50.2817
KEGG_RIBOSOME	0.232349	-0.00037008	11.022	6.30489e-27	2.52196e-26	50.1641
KEGG_GAP_JUNCTION	-0.104897	-0.00314099	-10.8098	5.2293e-26	2.04722e-25	48.0723
KEGG_COMPLEMENT_AND_COAGULATION_CASCADES	-0.149806	-0.000783818	-10.6627	2.22466e-25	8.52788e-25	46.641
KEGG_SNARE_INTERACTIONS_IN_VESICULAR_TRANSPORT	-0.122549	-0.00162199	-10.6458	2.62531e-25	9.85831e-25	46.4773
KEGG_EPITHELIAL_CELL_SIGNALING_IN_HELICOBACTER_PYLORI_INFECTION	-0.100651	-0.00247711	-10.145	3.1975e-23	1.13785e-22	41.7326
KEGG_PEROXISOME	0.13315	0.00265875	10.1444	3.21565e-23	1.13785e-22	41.727
KEGG_CIRCADIAN_RHYTHM_MAMMAL	-0.173999	-0.00352861	-10.1343	3.53548e-23	1.22741e-22	41.6333
KEGG_TYPE_II_DIABETES_MELLITUS	-0.101734	0.000137941	-9.9572	1.84299e-22	6.27983e-22	40.003
KEGG_PENTOSE_PHOSPHATE_PATHWAY	0.147497	-0.000604472	9.95101	1.95175e-22	6.52948e-22	39.9464
KEGG_ALDOSTERONE_REGULATED_SODIUM_REABSORPTION	-0.117143	0.000689966	-9.86339	4.37772e-22	1.43839e-21	39.1489
KEGG_GLYCOSAMINOGLYCAN_BIOSYNTHESIS_KERATAN_SULFATE	-0.160946	-0.00193633	-9.83248	5.81322e-22	1.87655e-21	38.869
KEGG_DORSO_VENTRAL_AXIS_FORMATION	-0.117452	0.00430481	-9.51181	1.05472e-20	3.23446e-20	36.0092
KEGG_PANTOTHENATE_AND_COA_BIOSYNTHESIS	-0.127612	0.00278771	-9.41369	2.51967e-20	7.60032e-20	35.1503
KEGG_PATHOGENIC_ESCHERICHIA_COLI_INFECTION	-0.111664	-0.00542822	-9.21591	1.42462e-19	4.09579e-19	33.4423
KEGG_AMINO_SUGAR_AND_NUCLEOTIDE_SUGAR_METABOLISM	-0.114644	-0.00314009	-9.19252	1.74495e-19	4.93956e-19	33.2424
KEGG_PRIMARY_IMMUNODEFICIENCY	-0.164911	-0.00386223	-9.16936	2.13228e-19	5.94454e-19	33.0448
KEGG_DILATED_CARDIOMYOPATHY	-0.112909	-0.00360848	-9.0917	4.16221e-19	1.12625e-18	32.3857
KEGG_ADHERENS_JUNCTION	-0.110178	0.000531786	-8.98385	1.04552e-18	2.74823e-18	31.4782
KEGG_HYPERTROPHIC_CARDIOMYOPATHY_HCM	-0.106295	-0.00246257	-8.89662	2.18706e-18	5.66787e-18	30.7511
KEGG_ACUTE_MYELOID_LEUKEMIA	-0.100054	-0.00100602	-8.80853	4.58023e-18	1.15447e-17	30.0232
KEGG_PYRUVATE_METABOLISM	0.119325	0.00124578	8.66041	1.56513e-17	3.89166e-17	28.8134
KEGG_ETHER_LIPID_METABOLISM	-0.106052	-0.00232822	-8.63284	1.96353e-17	4.81719e-17	28.5902
KEGG_PYRIMIDINE_METABOLISM	0.10843	0.00229297	8.50039	5.78656e-17	1.38276e-16	27.5267
KEGG_GLYCOSYLPHOSPHATIDYLINOSITOL_GPI_ANCHOR_BIOSYNTHESIS	0.123506	0.00362594	8.14615	9.70695e-16	2.28985e-15	24.7538
KEGG_OLFACTORY_TRANSDUCTION	0.10523	0.00658451	7.88164	7.45024e-15	1.67176e-14	22.752
KEGG_DNA_REPLICATION	0.171919	0.00597208	7.81998	1.18815e-14	2.572e-14	22.2938
KEGG_HOMOLOGOUS_RECOMBINATION	0.138051	0.000699609	7.61226	5.59049e-14	1.1961e-13	20.7742
KEGG_NON_HOMOLOGOUS_END_JOINING	0.137647	0.00221684	7.47146	1.56443e-13	3.30868e-13	19.7653
KEGG_GLYOXYLATE_AND_DICARBOXYLATE_METABOLISM	0.122659	-0.0012786	7.2787	6.22812e-13	1.2733e-12	18.4117
KEGG_GLYCOSAMINOGLYCAN_DEGRADATION	-0.107701	-0.00452579	-7.15273	1.51011e-12	3.0534e-12	17.5446
KEGG_STEROID_BIOSYNTHESIS	0.141708	0.00683048	6.99559	4.4725e-12	8.84881e-12	16.4823
KEGG_MISMATCH_REPAIR	0.132298	0.00353412	6.70599	3.12856e-11	5.93459e-11	14.5815
KEGG_CITRATE_CYCLE_TCA_CYCLE	0.104157	0.00125904	5.63189	2.23903e-08	3.61388e-08	8.18704

## Sheet: S6
Table S6: Prognostic analysis of 301 subtype-related genes using a univariate Cox regression model
id	HR	HR.95L	HR.95H	p-value
DPYD	1.20222	1.0294	1.40404	0.0200207
NR3C1	1.1421	1.00474	1.29822	0.0421159
ZEB2	1.32536	1.10892	1.58405	0.00195835
GNB4	1.19023	1.02213	1.38598	0.0249771
GPNMB	1.10403	1.01653	1.19905	0.0188196
NRP1	1.41541	1.20392	1.66405	2.58173e-05
RAB8B	1.17205	1.00124	1.37199	0.0482224
PLXDC2	1.1307	1.01204	1.26327	0.0298964
AHCY	0.842347	0.722567	0.981983	0.0283585
AXIN2	0.872866	0.788776	0.96592	0.00851744
CLIP4	1.32408	1.11816	1.56792	0.00113409
CD163	1.14248	1.03118	1.2658	0.0108622
MITF	1.25299	1.07449	1.46113	0.00402361
MRC1	1.09619	1.00817	1.19191	0.0315182
CTSL	1.19898	1.05787	1.35892	0.00450264
MS4A7	1.13026	1.00899	1.26611	0.0344778
MAFB	1.13453	1.01832	1.264	0.0220659
FCGR2B	1.16451	1.04381	1.29917	0.00637263
CSGALNACT2	1.48716	1.25508	1.76215	4.54917e-06
FRMD6	1.24403	1.12316	1.37792	2.82565e-05
BCAT1	1.21747	1.08211	1.36977	0.00106739
PALLD	1.15381	1.00071	1.33032	0.0488647
ASCL2	0.920652	0.850366	0.996747	0.0413129
ITGAM	1.13768	1.02048	1.26833	0.0200473
TRIB2	1.22813	1.09974	1.37151	0.000264844
QKI	1.3397	1.13747	1.57789	0.000460696
COLEC12	1.21422	1.10592	1.33313	4.6592e-05
IL1R1	1.23679	1.07099	1.42827	0.00380628
HIF1A	1.21202	1.0222	1.43709	0.0269239
MEIS2	1.23627	1.12326	1.36066	1.44884e-05
PMP22	1.31213	1.11854	1.53922	0.0008518
ANTXR2	1.22919	1.04094	1.45149	0.0149719
VGLL3	1.30765	1.14906	1.48813	4.7777e-05
MS4A4A	1.12622	1.01196	1.25338	0.0294242
TMEM45A	1.19297	1.08651	1.30987	0.00021604
NEXN	1.12672	1.03113	1.23117	0.00834456
JAZF1	1.2519	1.08437	1.44532	0.0021761
DNAJB4	1.23864	1.07371	1.42891	0.00333096
LINC01094	1.20837	1.04317	1.39974	0.0116226
PRRX1	1.15319	1.05078	1.26559	0.002665
DAPK1	1.24042	1.0953	1.40476	0.000688902
STOM	1.17776	1.01042	1.37282	0.0363919
SLC5A6	0.849583	0.735918	0.980803	0.0261162
DDR2	1.18919	1.06819	1.3239	0.00155203
CLMP	1.18148	1.05746	1.32005	0.00320535
CYBRD1	1.15924	1.05036	1.27939	0.00332027
TWSG1	1.17348	1.01568	1.35581	0.0299275
MSR1	1.17304	1.03306	1.33199	0.013833
ETS1	1.16878	1.00055	1.3653	0.0491934
WWTR1	1.2731	1.12715	1.43795	0.000101658
CD109	1.23509	1.11404	1.3693	6.0248e-05
PNMA1	1.33769	1.18347	1.51202	3.23797e-06
CHST11	1.24649	1.07958	1.43919	0.00266464
CCL8	1.10769	1.0183	1.20491	0.0171947
RAB31	1.11756	1.01872	1.226	0.0186488
RNF43	0.878615	0.799896	0.965081	0.0068896
ROMO1	0.830912	0.703033	0.982051	0.0298269
VIM	1.30048	1.144	1.47836	5.89993e-05
PKD2	1.25016	1.102	1.41824	0.000522207
SERPING1	1.10739	1.0112	1.21272	0.0277848
VSIG4	1.18433	1.08058	1.29804	0.000298236
GAS1	1.17968	1.08335	1.28457	0.000143598
FYN	1.23296	1.08266	1.40413	0.00159233
GPX8	1.20761	1.08287	1.34672	0.000696097
POSTN	1.19347	1.09256	1.30369	8.70692e-05
OLR1	1.13569	1.04417	1.23524	0.00299543
GPC6	1.15639	1.02189	1.3086	0.0212707
RGS2	1.14685	1.04699	1.25624	0.00319919
HEG1	1.21705	1.06733	1.38777	0.00335858
FCGR1B	1.17072	1.0291	1.33182	0.0165723
TPBG	1.26669	1.08898	1.4734	0.00217539
GFPT2	1.19808	1.0768	1.33303	0.000904224
CYP1B1	1.21743	1.11419	1.33025	1.35375e-05
TMEM263	1.1781	1.01234	1.37102	0.0341378
C5AR1	1.19562	1.07694	1.32737	0.000808917
CCDC80	1.13609	1.03009	1.25301	0.0106773
VEGFC	1.35607	1.185	1.55182	9.54395e-06
TNFSF10	0.862472	0.749062	0.993053	0.039698
PPP1R18	1.29859	1.12584	1.49785	0.00033392
SPON1	1.11739	1.03188	1.20998	0.00628546
TIMP2	1.17775	1.05531	1.31439	0.00348809
TNFAIP6	1.15562	1.0659	1.25289	0.000451762
ZFPM2	1.28258	1.13795	1.44559	4.5636e-05
SIGLEC1	1.2111	1.04768	1.4	0.00960424
GGH	0.869808	0.790047	0.957621	0.00447743
CHST15	1.35395	1.15796	1.58311	0.000145736
SFRP2	1.10146	1.04978	1.15569	8.11258e-05
PECAM1	1.19321	1.0249	1.38915	0.0227848
SPOCK1	1.15225	1.06917	1.24179	0.000205869
MFAP5	1.08231	1.00254	1.16843	0.042878
OSMR	1.19921	1.05309	1.36562	0.00614144
FBN1	1.1892	1.08173	1.30735	0.000336364
PLAGL2	0.817081	0.720879	0.926121	0.00157328
FGL2	0.901858	0.819375	0.992643	0.0347855
SRPX	1.13739	1.042	1.24151	0.00396975
IHH	0.85343	0.764773	0.952366	0.00462456
JAM2	1.15899	1.0132	1.32575	0.0314584
FBXO32	1.15211	1.0037	1.32246	0.0441762
FAP	1.15405	1.06192	1.25419	0.000738044
SPARCL1	1.19351	1.09131	1.30528	0.000107518
CXCL13	0.917155	0.862234	0.975573	0.00605285
ADAM12	1.19954	1.07625	1.33696	0.00100944
CFL2	1.19475	1.06734	1.33737	0.00198387
MSRB3	1.20994	1.08295	1.35182	0.000755602
LUM	1.11683	1.02024	1.22257	0.0166649
SPHK1	1.21356	1.08747	1.35427	0.000543991
APOE	1.09926	1.01603	1.18931	0.0184777
SNAI2	1.15958	1.04154	1.29099	0.00686977
TCF4	1.19242	1.03304	1.37638	0.0162146
CALD1	1.2388	1.10419	1.38981	0.000263409
MIR100HG	1.23179	1.12051	1.35413	1.59545e-05
BASP1	1.15651	1.00578	1.32984	0.0412645
TNFSF4	1.12988	1.01318	1.26002	0.0281308
LINC01315	0.845026	0.732971	0.974212	0.020346
FERMT2	1.21888	1.09518	1.35655	0.000288807
TSPYL5	1.19867	1.0528	1.36476	0.0061973
CAV2	1.32273	1.1492	1.52245	9.69029e-05
SULF1	1.11505	1.03198	1.2048	0.00583189
GSDME	1.19052	1.04544	1.35575	0.00853495
NAP1L3	1.22514	1.07786	1.39255	0.00188769
LOX	1.1898	1.07663	1.31485	0.000654368
GPR143	0.90333	0.828644	0.984747	0.0209402
NXN	1.22709	1.10751	1.35959	9.15402e-05
ARMCX1	1.15409	1.03453	1.28746	0.0102186
CCL2	1.11807	1.01969	1.22593	0.0175503
SLIT2	1.19824	1.08065	1.32862	0.000599739
RSPO3	1.11594	1.02188	1.21866	0.0146154
HHEX	1.16204	1.00952	1.33761	0.0364465
CNRIP1	1.17211	1.01635	1.35173	0.0290457
ZNF521	1.16854	1.02655	1.33018	0.0184558
ARL4C	1.26804	1.1215	1.43372	0.000150577
PLN	1.12806	1.05234	1.20922	0.00067579
PDGFRL	1.11711	1.01004	1.23553	0.0312166
ZNF532	1.41114	1.2366	1.61031	3.17947e-07
VCAN	1.16958	1.06996	1.27849	0.000563537
CAV1	1.17503	1.0489	1.31632	0.00536818
CLDN3	0.845018	0.756296	0.944148	0.00292561
NUAK1	1.2604	1.10911	1.43233	0.000389247
CD93	1.21253	1.05841	1.3891	0.00546181
EMP3	1.14529	1.01575	1.29136	0.0267504
CDX2	0.817474	0.742838	0.899608	3.69448e-05
CDKN2B	1.12387	1.00296	1.25937	0.0443491
GREM1	1.08479	1.01371	1.16084	0.0185814
PRR15	0.815411	0.731058	0.909497	0.000249641
MEIS1	1.16874	1.03563	1.31896	0.011488
C3orf80	1.20158	1.06403	1.35691	0.00307182
GPX2	0.829032	0.736413	0.933299	0.00192212
UBE2E2	1.1814	1.05821	1.31894	0.00300806
PLK2	1.27396	1.14804	1.41369	5.11814e-06
ANXA1	1.16957	1.04431	1.30985	0.00672464
HUNK	0.862173	0.76763	0.96836	0.0123319
RAMP1	1.10719	1.02975	1.19046	0.00591785
RAI14	1.22571	1.07307	1.40005	0.00270535
COL3A1	1.19485	1.08626	1.31429	0.00025034
COL10A1	1.09384	1.03437	1.15673	0.00166277
C1R	1.11623	1.00556	1.23908	0.0390068
MGP	1.16017	1.07123	1.2565	0.000261473
COL6A3	1.16602	1.06001	1.28263	0.00158732
NID2	1.1372	1.01273	1.27696	0.0297121
AOC3	1.18576	1.08829	1.29196	9.89728e-05
SPP1	1.1135	1.04581	1.18556	0.000779473
CDH11	1.18319	1.06629	1.3129	0.00152759
SGCE	1.16758	1.04971	1.2987	0.00432557
SDC2	1.14566	1.02347	1.28245	0.018126
TSPAN6	0.858224	0.761066	0.967786	0.0126264
ADAMTS2	1.15255	1.03331	1.28555	0.0108308
IL2RB	0.837627	0.729499	0.961782	0.0119865
TCEAL7	1.19212	1.06382	1.33588	0.00248651
SERPINF1	1.11246	1.00918	1.2263	0.0320427
ITGA5	1.25535	1.13155	1.39269	1.76133e-05
DDC	0.818422	0.750066	0.893007	6.70123e-06
CXCL10	0.934658	0.8748	0.998612	0.045381
COL5A2	1.18582	1.08368	1.29759	0.000208366
BAG2	1.26415	1.1133	1.43545	0.000299888
C10orf99	0.911164	0.869792	0.954505	8.71504e-05
PDLIM3	1.22454	1.09195	1.37325	0.00053173
AEBP1	1.15722	1.06319	1.25956	0.000732773
OLFML2B	1.19262	1.08203	1.31452	0.000388531
CTHRC1	1.13694	1.05759	1.22224	0.00050728
CLIC4	1.26996	1.12123	1.43842	0.000169526
COL15A1	1.09833	1.00065	1.20554	0.0484187
ADAMTS1	1.17896	1.05683	1.31522	0.00317294
SLC43A3	1.17034	1.05346	1.30019	0.00338955
THBS1	1.23597	1.08317	1.41034	0.0016526
ANO1	1.21249	1.10253	1.33341	7.1157e-05
GJA1	1.22645	1.09649	1.37181	0.000354505
SMARCA1	1.18904	1.0519	1.34405	0.00561831
CILP	1.15641	1.05377	1.26904	0.0021815
EGR2	1.23269	1.10385	1.37657	0.00020397
CXCL9	0.930764	0.872183	0.993279	0.030519
AKAP12	1.22822	1.12253	1.34388	7.55761e-06
HOXB2	1.27909	1.14007	1.43507	2.75419e-05
COL8A1	1.22309	1.10358	1.35555	0.000123705
TREM1	1.12024	1.01877	1.23182	0.0190902
SLC2A3	1.30143	1.18303	1.43168	6.17297e-08
PDGFC	1.16127	1.04145	1.29488	0.0071269
ASPN	1.11856	1.04611	1.19603	0.0010407
SCG2	1.24079	1.13212	1.35988	3.95549e-06
ANGPTL2	1.1744	1.0559	1.30621	0.0030551
NR1I2	0.868863	0.778496	0.969719	0.0121166
SLC39A5	0.86586	0.78364	0.956707	0.00466405
FNDC1	1.09194	1.01967	1.16933	0.011818
PTGIS	1.19752	1.06916	1.34129	0.0018337
DPYSL3	1.16634	1.04794	1.29812	0.0048426
TNS1	1.22956	1.10353	1.36999	0.000180171
TUBB6	1.20059	1.07427	1.34177	0.00126876
SNHG18	0.81941	0.732489	0.916646	0.000499203
MARCO	1.14643	1.04691	1.25541	0.0031852
ACE2	0.925777	0.871815	0.983079	0.0118381
ANTXR1	1.18396	1.05004	1.33495	0.00582921
COL6A2	1.18181	1.06573	1.31054	0.00154135
HTR2B	1.18888	1.07885	1.31013	0.000479811
SPARC	1.20363	1.08469	1.33561	0.000480474
SPINK1	0.888622	0.839804	0.940278	4.20285e-05
FABP4	1.18136	1.09642	1.27288	1.19768e-05
THBS2	1.13163	1.05875	1.20953	0.000271781
COL1A2	1.16699	1.06931	1.27358	0.000534727
PLA2G12B	0.904321	0.837923	0.975981	0.00974246
F13A1	1.12645	1.03738	1.22317	0.00460715
HSD17B6	1.12785	1.01522	1.25297	0.0249962
PXDN	1.23988	1.10706	1.38864	0.000199851
IGFBP5	1.18146	1.05695	1.32064	0.00333817
CD2	0.848451	0.758061	0.949618	0.00424433
HOXC6	1.18932	1.11777	1.26545	4.325e-08
NDN	1.12715	1.00984	1.2581	0.0327979
TMEM47	1.15736	1.04385	1.2832	0.00552254
C7	1.14664	1.04157	1.26231	0.00526071
COL11A1	1.12779	1.05113	1.21005	0.000813532
FSCN1	1.20623	1.10197	1.32034	4.79706e-05
INHBA	1.19465	1.08218	1.31881	0.000422608
NT5E	1.23962	1.11183	1.3821	0.000108952
TLE2	0.899396	0.811435	0.996892	0.0434624
COL5A1	1.18811	1.08255	1.30396	0.0002825
ARMCX2	1.27226	1.1404	1.41935	1.60671e-05
PPP1R14D	0.841078	0.775353	0.912374	3.05958e-05
IL7R	0.869718	0.772847	0.97873	0.0205144
PRELP	1.16072	1.0532	1.27922	0.00265595
BGN	1.18111	1.07762	1.29455	0.000374193
GEM	1.19818	1.07775	1.33208	0.000822197
S100A8	1.12978	1.03282	1.23583	0.00768795
TAGLN	1.15977	1.06333	1.26496	0.000819506
AGT	0.911728	0.832569	0.998412	0.0461244
SERPINE1	1.25461	1.14554	1.37405	1.017e-06
CXCL11	0.925639	0.874408	0.979872	0.00781634
LOXL1	1.19016	1.07307	1.32002	0.000985234
DACT1	1.15815	1.04625	1.28201	0.00462358
GPX3	1.15984	1.06022	1.26881	0.00121138
FN1	1.103	1.01656	1.19679	0.0185517
TWIST1	1.11904	1.01472	1.23409	0.0242846
SELENBP1	0.866907	0.803819	0.934946	0.000211513
MRGPRF	1.09942	1.00052	1.20809	0.0487456
IL1R2	0.914797	0.83845	0.998096	0.0451967
CRYAB	1.22384	1.10949	1.34998	5.44085e-05
GRM8	0.901914	0.816631	0.996104	0.0416517
PCOLCE	1.12353	1.00868	1.25147	0.0342568
AIFM3	0.847247	0.762335	0.941615	0.00209471
EMILIN1	1.18676	1.06648	1.3206	0.00168661
CDHR1	0.917414	0.854061	0.985466	0.018226
COL12A1	1.16303	1.04974	1.28855	0.00387319
HTRA1	1.21851	1.09607	1.35464	0.000254611
THBS4	1.08596	1.00454	1.17398	0.0380898
ISLR	1.15099	1.05667	1.25372	0.00126656
ENO2	1.20907	1.08937	1.34194	0.000358247
FLNA	1.22084	1.10884	1.34415	4.81637e-05
CXCL14	0.92671	0.868843	0.98843	0.020683
VAV3	0.881804	0.823945	0.943727	0.000280551
HSD11B2	0.837965	0.76423	0.918814	0.00016877
CKB	0.905837	0.848492	0.967059	0.00303845
SYNPO2	1.10125	1.01608	1.19357	0.0188573
LMOD1	1.11476	1.02197	1.21597	0.0142768
CTTNBP2	0.868617	0.788611	0.956739	0.00427677
CALB2	1.23904	1.13274	1.35531	2.82049e-06
COL1A1	1.16458	1.05856	1.28121	0.00175604
DUSP4	1.08758	1.00663	1.17504	0.0333897
GUCY2C	0.86437	0.79576	0.938895	0.000551872
A1CF	0.902508	0.820655	0.992524	0.034458
PPP1R14C	0.903412	0.836733	0.975405	0.0094173
TMEM252	0.845847	0.75424	0.948581	0.00420244
NOX1	0.860628	0.804115	0.921112	1.48277e-05
CKMT2	0.887202	0.82934	0.949102	0.000504984
FABP1	0.920345	0.873672	0.969511	0.00177184
CNN1	1.08893	1.01876	1.16394	0.0121844
SFRP4	1.0648	1.00223	1.13128	0.0421585
SERPINB2	1.10152	1.01255	1.1983	0.024435
FOXD1	1.17592	1.0873	1.27176	5.04042e-05
DEFA6	0.955341	0.912858	0.999801	0.0490083
PLCB4	0.905655	0.85163	0.963108	0.0015896
MAB21L2	1.0882	1.00529	1.17795	0.0365839
VIP	1.08767	1.0164	1.16394	0.0150781
PNLIPRP2	0.901396	0.831115	0.97762	0.0121949
MMP12	0.900098	0.842251	0.961918	0.00189914
MYH11	1.08264	1.00516	1.1661	0.0360904
CCL20	0.909623	0.849882	0.973563	0.00627621
COMP	1.12074	1.05417	1.19153	0.000264092
QPCT	0.911711	0.84481	0.98391	0.0174477
PLA2G2A	0.955815	0.915036	0.99841	0.0422068
HMGCS2	0.937907	0.885925	0.992939	0.0275573
MUC12	0.920799	0.86594	0.979134	0.00846867
KRT20	0.938464	0.888231	0.991537	0.0236494
OLFM4	0.961728	0.930753	0.993735	0.019479
SLC26A3	0.931208	0.889294	0.975097	0.00241963
